# Supplementary material
Source: publisher figshare collection journal article supplement (https://acs.figshare.com/ndownloader/files/4759891)

**The First Total Synthesis of (–)- and (+)-2-Hydroxy-24-oxooctacosanolide Using an Effective Lactonization**

Isamu Shiina,\* Takaaki Kikuchi and Akane Sasaki

*Department of Applied Chemistry, Faculty of Science, Tokyo University of Science,  
Kagurazaka, Shinjuku-ku, Tokyo 162-8601, Japan*

**Supporting Information**

|       |                        |
|-------|------------------------|
| S1    | General Information    |
| S2-16 | Experimental Procedure |

**General Information.** All reactions were carried out under argon atmosphere in dried glassware, unless otherwise noted. Dichloromethane was distilled from diphosphorus pentoxide, then calcium hydride, and dried over MS 4 Å, benzene, toluene and DMF were distilled from diphosphorus pentoxide, and dried over MS 4 Å, and THF was distilled from sodium/benzophenone immediately prior to use. All reagents were purchased from Tokyo Kasei Kogyo Co., Ltd., Kanto Chemical Co., Inc. or Aldrich Chemical Co., Inc., and used without further purification unless otherwise noted. Column chromatography was performed on Silica gel 60 (Merck) or Wakogel B5F. Thin layer chromatography was performed on Wakogel B5F. <sup>1</sup>H and <sup>13</sup>C NMR spectra were recorded with tetramethylsilane (TMS), chloroform (in chloroform-*d*) or benzene (in benzene-*d*<sub>6</sub>) as internal standard.

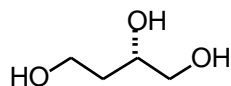

**(S)-(-)-1,2,4-Butanetriol:**<sup>1</sup> To a solution of borane-dimethylsulfide complex (11.4 mL, 120 mmol) at 0 °C was added trimethylborate (12.5 mL, 110 mmol) and THF (25 mL). The reaction mixture was stirred for 15 min at 0 °C and then (*S*)-malic acid (**6**) 5.00 g, 37.3 mmol) was added. After the reaction mixture had been stirred for 23 h at room temperature, methanol was added at 0 °C. The solvent was removed by evaporation and then the residue was filtered through a short pad of silica gel eluting with dichloromethane/methanol=4/1. The filtrate was concentrated, and the residue was filtered again through a short pad of absorbent cotton eluting with dichloromethane/methanol=9/1. Evaporation of the solvent gave (*S*)-(-)-1,2,4-butanetriol (3.84 g, 97%) as a colorless oil. The crude product was instantly used in the following reaction without further purification.

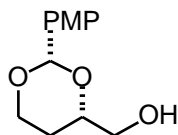

**(2S)-2,4-[(*S*)-*p*-Methoxybenzylidenedioxy]butanol:**<sup>1</sup> To a solution of (*S*)-(-)-1,2,4-butanetriol (3.64 g, 34.3 mmol) and *p*-methoxybenzaldehyde dimethylacetal (11.6 mL, 68.1 mmol) in dichloromethane (36.4 mL) at room temperature was added CSA (799 mg, 3.44 mmol). After the reaction mixture had been stirred for 19 h at room temperature, triethylamine was added. The mixture was concentrated by evaporation of the solvent and then the crude product was purified by column chromatography (eluant; hexane/ethyl acetate=1/1) to afford (2*S*)-2,4-[(*S*)-*p*-methoxybenzylidenedioxy]butanol (6.25 g, 81%) as a colorless oil: <sup>1</sup>H NMR (C<sub>6</sub>D<sub>6</sub>): 7.56 (ddd, *J* = 9.0, 3.0, 2.5 Hz, 2H, PMP), 6.82 (ddd, *J* = 9.0, 3.0, 2.5 Hz, 2H, PMP), 5.32 (s, 1H, CHPMP), 3.94 (ddd, *J* = 12.0, 5.0, 1.0 Hz, 1H, 4-H), 3.58 (dddd, *J* = 12.5, 6.0, 4.0, 2.5 Hz, 1H, 2-H), 3.49 (ddd, *J* = 12.0, 11.5, 3.0 Hz, 1H, 4-H), 3.48 (dd, *J* = 11.5, 6.0 Hz, 1H, 1-H), 3.44 (dd, *J* = 11.5, 4.0 Hz, 1H, 1-H), 3.29 (s, 3H, OMe), 2.21 (br s, 1H, OH), 1.62 (dddd, *J* = 13.0, 12.5, 11.5, 5.0 Hz, 1H, 3-H), 0.85 (dddd, *J* = 13.0, 3.0, 2.5, 1.0 Hz, 1H, 3-H); HR MS (ESI TOF): calcd for C<sub>12</sub>H<sub>16</sub>O<sub>4</sub>Na (M + Na<sup>+</sup>) 247.0941, found 247.0941.

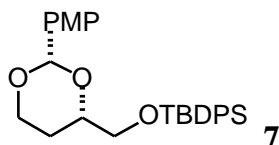

**(2S)-1-(*t*-Butyldiphenylsiloxy)-2,4-[(*S*)-*p*-**

**methoxybenzylidenedioxy]butane (7):**<sup>1</sup> To a solution of imidazole (555 mg, 8.15 mmol) and *t*-butylchlorodiphenylsilane (1.03 mL, 4.01 mmol) in DMF (6.68 mL) at 0 °C was added (2S)-2,4-[(*S*)-*p*-methoxybenzylidenedioxy]butanol (754.6 mg, 3.36 mmol) in DMF (6.68 mL). The reaction mixture was stirred for 1.5 h at room temperature and then water was added at 0 °C. The mixture was extracted with ethyl acetate, and the organic layer was washed with water and brine, dried over sodium sulfate. After filtration of the mixture and evaporation of the solvent, the crude product was purified by column chromatography on Silica gel 60N [spherical, neutral, Kanto Chem. Co., Inc.] (eluant; hexane/ethyl acetate=10/1) to afford TBDPS ether **7** (1.29 g, 83%) as a colorless oil: <sup>1</sup>H NMR (C<sub>6</sub>D<sub>6</sub>): 7.84-7.80 (m, 4H, TBDPS), 7.68 (ddd, *J* = 9.0, 3.2, 2.1 Hz, 2H, PMP), 7.24-7.19 (m, 6H, TBDPS), 6.82 (ddd, *J* = 9.0, 3.2, 2.1 Hz, 2H, PMP), 5.39 (s, 1H, CHPMP), 3.98 (ddd, *J* = 11.4, 5.4, 1.2 Hz, 1H, 4-H), 3.86 (dd, *J* = 9.9, 5.4 Hz, 1H, 1-H), 3.78 (dddd, *J* = 12.0, 5.4, 4.8, 2.1 Hz, 1H, 2-H), 3.68 (dd, *J* = 9.9, 4.8 Hz, 1H, 1-H), 3.52 (ddd, *J* = 11.4, 11.1, 2.7 Hz, 1H, 4-H), 3.26 (s, 3H, OMe), 1.70 (dddd, *J* = 12.3, 12.0, 11.1, 5.4 Hz, 1H, 3-H), 1.18 (s, 9H, TBDPS), 1.13 (dddd, *J* = 12.3, 2.7, 2.1, 1.2 Hz, 1H, 3-H); HR MS (ESI TOF): calcd for C<sub>28</sub>H<sub>34</sub>O<sub>4</sub>SiNa (M + Na<sup>+</sup>) 485.2119, found 485.2124.

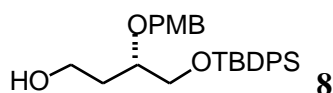

**(3S)-4-(*t*-Butyldiphenylsiloxy)-3-(*p*-methoxybenzyloxy)butanol (8):**<sup>1</sup> To a solution of *p*-methoxybenzylidene acetal **7** (7.05 g, 15.2 mmol) in dichloromethane (75.7 mL) at -78 °C was added DIBAL in dichloromethane (1.0 M, 75.7 mL, 75.7 mmol). After the reaction mixture had been stirred for 4.5 h at -78 °C, methanol was added. The mixture was allowed to warm to room temperature and then saturated aqueous potassium sodium tartrate was added. The mixture was extracted with dichloromethane, and the organic layer was washed with brine, dried over sodium sulfate. After evaporation of the solvent, the crude product was purified by column chromatography (eluant; hexane/ethyl acetate=2/1) to afford alcohol **8** (6.46 g, 92%) as a colorless oil: [α]<sub>D</sub><sup>23</sup> = -30.4 (c 1.03, benzene); IR (neat): 3436 cm<sup>-1</sup>; <sup>1</sup>H NMR (CDCl<sub>3</sub>): 7.71-7.66 (m, 4H, TBDPS), 7.48-7.36 (m, 6H, TBDPS), 7.23 (d, *J* = 8.4 Hz, 2H, PMP), 6.88 (d, *J* = 8.6 Hz, 2H, PMP), 4.66 (d, *J* = 11.3 Hz, 1H, PMB), 4.44 (d, *J* = 11.3 Hz, 1H, PMB), 3.80 (s, 3H, OMe), 3.78-3.65 (m, 5H, 1-H, 3-H, 4-H), 2.41 (br s, 1H, OH), 1.92-1.71 (m, 2H, 2-H), 1.08 (s, 9H, TBDPS); <sup>13</sup>C NMR (CDCl<sub>3</sub>): 159.2 (PMP), 135.6 (Ar), 135.6 (Ar), 133.3 (Ar), 133.2 (Ar), 130.4 (Ar), 129.8 (Ar), 129.5 (Ar), 129.4 (Ar), 127.7 (Ar), 127.7 (Ar), 113.8 (PMP), 78.4 (3),

71.8 (PMB), 65.9 (4), 60.5 (1), 55.3 (OMe), 34.1 (2), 26.8 (TBDPS), 19.2 (TBDPS); HR MS (ESI TOF): calcd for  $C_{28}H_{36}O_4SiNa$  ( $M + Na^+$ ) 487.2275, found 487.2293.

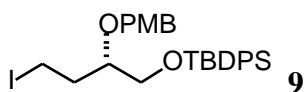

**(2S)-1-(*t*-Butyldiphenylsiloxy)-4-iodo-2-(*p*-methoxybenzyloxy)butane**

**(9):** To a solution of alcohol **8** (5.56 g, 12.0 mmol), imidazole (2.05 g, 30.1 mmol) and triphenylphosphine (7.88 g, 30.1 mmol) in benzene (60 mL) at 0 °C was added iodine (6.07 g, 24.0 mmol). The reaction mixture was stirred for 5 h at room temperature and then saturated aqueous sodium thiosulfate was added. The mixture was extracted with diethyl ether and the organic layer was washed with water and brine, dried over sodium sulfate. After filtration of the mixture and evaporation of the solvent, the crude product was purified by column chromatography (eluant; hexane/ethyl acetate=20/1) to afford iodide **9** (6.66 g, 96%) as a colorless oil:  $[\alpha]_D^{21} = -10.0$  (c 0.313, benzene); IR (neat): 3071, 2928, 2855  $cm^{-1}$ ;  $^1H$  NMR ( $CDCl_3$ ): 7.68-7.63 (m, 4H, TBDPS), 7.46-7.34 (m, 6H, TBDPS), 7.25-7.23 (m, 2H, PMP), 6.87-6.84 (m, 2H, PMP), 4.57 (d,  $J = 9.7$  Hz, 1H, PMB), 4.39 (d,  $J = 9.7$  Hz, 1H, PMB), 3.86-3.75 (m, 1H, 1-H), 3.81 (s, 3H, OMe), 3.79-3.54 (m, 1H, 2-H), 3.72 (dd,  $J = 9.3, 4.6$  Hz, 1H, 1-H), 3.35 (dd,  $J = 9.5, 4.9$  Hz, 1H, 4-H), 3.31 (dd,  $J = 7.7, 3.9$  Hz, 1H, 4-H), 1.96-1.71 (m, 2H, 3-H), 1.05 (s, 9H, TBDPS);  $^{13}C$  NMR ( $CDCl_3$ ): 159.2 (PMP), 135.6 (Ar), 135.6 (Ar), 133.3 (Ar), 133.3 (Ar), 130.6 (Ar), 129.7 (Ar), 129.5 (Ar), 129.4 (Ar), 127.7 (Ar), 127.7 (Ar), 113.8 (PMP), 78.4 (2), 71.8 (PMB), 65.9 (1), 55.3 (OMe), 34.1 (3), 26.8 (TBDPS), 19.2 (TBDPS), 3.34 (4); HR MS (FAB): calcd for  $C_{28}H_{35}O_3ISi$  ( $M + H^+$ ) 574.1400, found 574.1298.

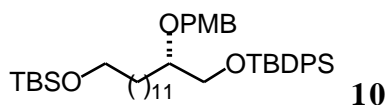

**(2S)-14-(*t*-Butyldimethylsiloxy)-1-(*t*-butyldiphenylsiloxy)-2-(*p*-methoxybenzyloxy)tetradecane (10):**

To a solution of cuprous(I) iodide (3.42 mg, 18.0  $\mu$ mol) and 2,2'-bipyridyl (2.81 mg, 18.0  $\mu$ mol) in THF (1 mL) at room temperature was added iodide **9** (100 mg, 17.9 mmol) in THF (5 mL). After the reaction mixture had been stirred for 5 min at room temperature, a solution of Grignard reagent **A** (0.90 M, 0.70 mL, 0.63 mmol) was added at -20 °C. The reaction mixture was stirred for 1 h at room temperature and then saturated aqueous ammonium chloride was added. The mixture was extracted with diethyl ether, and the organic layer was washed with brine, dried over sodium sulfate. After filtration of the mixture and evaporation of the solvent, the crude product was purified by thin layer chromatography (eluant;

hexane/ethyl acetate=20/1) to afford 14-carbons unit **10** (116.1 mg, 90%) as a colorless oil:  $[\alpha]_{\text{D}}^{23} = -14.5$  (c 0.800, benzene); IR (neat): 3071, 2928, 2855  $\text{cm}^{-1}$ ;  $^1\text{H}$  NMR ( $\text{CDCl}_3$ ): 7.70-7.67 (m, 4H, TBDPS), 7.45-7.34 (m, 6H, TBDPS), 7.23 (d,  $J = 8.9$  Hz, 2H, PMP), 6.85 (d,  $J = 8.9$  Hz, 2H, PMP), 4.60 (d,  $J = 11.3$  Hz, 1H, PMB), 4.44 (d,  $J = 11.1$  Hz, 1H, PMB), 3.80 (s, 3H, OMe), 3.73 (dd,  $J = 10.5, 5.7$  Hz, 1H, 1-H), 3.65-3.53 (m, 1H, 1-H), 3.60 (t,  $J = 4.1$  Hz, 2H, 14-H), 3.50-3.42 (m, 1H, 2-H), 1.56-1.48 (m, 5H), 1.39-1.12 (m, 17H), 1.06 (s, TBDPS, 9H), 0.90 (s, 9H, TBS), 0.05 (s, 6H, TBS);  $^{13}\text{C}$  NMR ( $\text{CDCl}_3$ ): 160.9 (PMP), 135.6 (Ar), 133.7 (Ar), 131.0 (Ar), 129.6 (Ar), 129.3 (Ar), 127.6 (Ar), 113.7 (PMP), 79.5 (2), 71.8 (PMB), 66.0 (1), 63.4 (14), 55.3 (OMe), 32.9 (13), 31.7 (3), [29.6 and 29.5] (5 to 11), 26.8 (TBDPS), 26.0 (TBS), 25.8 (12), 25.3 (4), 19.5 (TBDPS), 18.4 (TBS), -5.3 (TBS); HR MS (FAB): calcd for  $\text{C}_{44}\text{H}_{70}\text{O}_4\text{Si}_2$  ( $\text{M} + \text{H}^+$ ) 718.4813, found 718.4709.

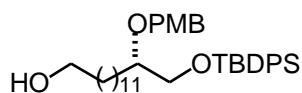

**(13S)-14-(*t*-Butyldiphenylsiloxy)-13-(*p*-methoxybenzyloxy)tetradecanol:**

To a solution of silyl ether **10** (868 mg, 1.21 mmol) in THF (120 mL) at 0 °C was added 1 M hydrochloric acid (60 mL). The reaction mixture was stirred for 6 h at room temperature and then saturated aqueous sodium hydrogencarbonate was added at 0 °C. The mixture was extracted with diethyl ether and the organic layer was washed with brine, dried over sodium sulfate. After filtration of the mixture and evaporation of the solvent, the crude product was purified by column chromatography (eluant; hexane/ethyl acetate=3/1) to afford (13S)-14-(*t*-butyldiphenylsiloxy)-13-(*p*-methoxybenzyloxy)tetradecanol (710 mg, 96%) as a colorless oil:  $[\alpha]_{\text{D}}^{23} = -16.5$  (c 1.00, benzene); IR (neat): 3374  $\text{cm}^{-1}$ ;  $^1\text{H}$  NMR ( $\text{CDCl}_3$ ): 7.72-7.64 (m, 4H, TBDPS), 7.40-7.32 (m, 6H, TBDPS), 7.26-7.17 (m, 2H, PMP), 6.87-6.81 (m, 2H, PMP), 4.60 (d,  $J = 11.3$  Hz, 1H, PMB), 4.44 (d,  $J = 11.1$  Hz, 1H, PMB), 3.80 (s, 3H, OMe), 3.73 (dd,  $J = 10.5, 5.9$  Hz, 1H, 1-H), 3.68-3.60 (m, 3H, 1-H, 14-H), 3.53-3.43 (m, 1H, 2-H), 1.66-1.18 (m, 23H), 1.11 (s, 9H, TBDPS);  $^{13}\text{C}$  NMR ( $\text{CDCl}_3$ ): 160.9 (PMP), 135.6 (Ar), 133.7 (Ar), 131.0 (Ar), 129.6 (Ar), 129.3 (Ar), 127.6 (Ar), 113.7 (PMP), 79.5 (2), 71.8 (PMB), 66.0 (1), 63.1 (14), 55.3 (OMe), 32.8 (13), 31.7 (3), [29.7, 29.6 and 29.4] (5 to 11), 26.8 (TBDPS), 25.7 (12), 25.4 (4), 19.4 (TBDPS); HR MS (FAB): calcd for  $\text{C}_{38}\text{H}_{56}\text{O}_4\text{Si}$  ( $\text{M} + \text{H}^+$ ) 604.3948, found 604.3848.

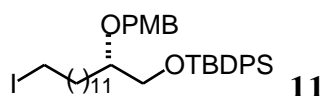

**(2S)-1-(*t*-Butyldiphenylsiloxy)-14-iodo-2-(*p*-**

**methoxybenzyloxy)tetradecane (11):** To a solution of (13S)-14-(*t*-butyldiphenylsiloxy)-13-(*p*-methoxybenzyloxy)tetradecanol (710 mg, 1.17 mmol), imidazole (200 mg, 2.93 mmol) and triphenylphosphine (770 mg, 2.93 mmol) in benzene (9.4 mL) at 0 °C was added iodine (595 mg, 2.35 mmol). The reaction mixture was stirred for 30 min at room temperature and then saturated aqueous sodium thiosulfate was added. The mixture was extracted with diethyl ether and the organic layer was washed with water and brine, dried over sodium sulfate. After filtration of the mixture and evaporation of the solvent, the crude product was purified by column chromatography (eluant; hexane/ethyl acetate=30/1) to afford iodide **11** (770 mg, 92%) as a colorless oil:  $[\alpha]_D^{21} = -6.61$  (c 0.947, benzene); IR (neat): 3070, 3048, 2998, 2927, 2854  $\text{cm}^{-1}$ ;  $^1\text{H}$  NMR ( $\text{CDCl}_3$ ): 7.71-7.63 (m, 4H, TBDPS), 7.46-7.33 (m, 6H, TBDPS), 7.26-7.23 (m, 2H, PMP), 6.88-6.84 (m, 2H, PMP), 4.61 (d,  $J = 11.3$  Hz, 1H, PMB), 4.44 (d,  $J = 11.1$  Hz, 1H, PMB), 3.80 (s, 3H, OMe), 3.73 (dd,  $J = 10.5$ , 5.9 Hz, 1H, 1-H), 3.63 (dd,  $J = 10.5$ , 4.6 Hz, 1H, 1-H), 3.53-3.43 (m, 1H, 2-H), 3.19 (t,  $J = 7.0$  Hz, 2H, 14-H), 1.82 (d, t,  $J = 14.3$ , 7.0 Hz, 2H), 1.60-1.18 (m, 20H), 1.07 (s, 9H, TBS);  $^{13}\text{C}$  NMR ( $\text{CDCl}_3$ ): 160.9 (PMP), 135.6 (Ar), 133.6 (Ar), 131.2 (Ar), 129.6 (Ar), 129.3 (Ar), 127.6 (Ar), 113.6 (PMP), 79.4 (2), 71.8 (PMB), 66.4 (1), 55.3 (OMe), 33.6 (13), 31.6 (3), 30.5 (12), [29.7, 29.6 and 29.4] (5 to 10), 28.5 (11), 26.8 (TBDPS), 25.4 (4), 19.2 (TBDPS), 7.4 (14); HR MS (FAB): calcd for  $\text{C}_{38}\text{H}_{55}\text{O}_3\text{Si}$  ( $\text{M} + \text{H}^+$ ) 714.2965, found 714.2864.

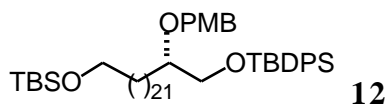**(2S)-24-(*t*-Butyldimethylsiloxy)-1-(*t*-butyldiphenylsiloxy)-2-(*p*-**

**methoxybenzyloxy)tetracosane (12):** To a solution of cuprous(I) iodide (285 mg, 1.50 mmol) and 2,2'-bipyridyl (235 mg, 1.50 mmol) in THF (1.1 mL) at room temperature was added iodide **11** (3.57 g, 5.00 mmol) in THF (10 mL). After the reaction mixture had been stirred for 5 min at room temperature, a solution of Grignard reagent **A** (0.555 M, 1.84 mL, 10.2 mmol) was added at -17 °C. The reaction mixture was stirred for 1 h at room temperature and then saturated aqueous ammonium chloride was added. The mixture was filtered through a short pad of Celite, and the filtrate was extracted with diethyl ether. The organic layer was washed with brine, dried over sodium sulfate. After filtration of the mixture and evaporation of the solvent, the crude product was purified by thin layer chromatography (eluant; hexane/ethyl acetate=10/1) to afford 24-carbons unit **12** (4.10 g, 96%) as a colorless oil:  $[\alpha]_D^{21} = -12.1$  (c 1.01, benzene); IR (neat): 3071, 3049, 2999, 2926, 2854  $\text{cm}^{-1}$ ;  $^1\text{H}$  NMR ( $\text{CDCl}_3$ ): 7.72-

7.65 (m, 4H, TBDPS), 7.46-7.35 (m, 6H, TBDPS), 7.26-7.23 (m, 2H, PMP), 6.88-6.84 (m, 2H, PMP), 4.61 (d,  $J = 11.3$  Hz, 1H, PMB), 4.45 (d,  $J = 11.3$  Hz, 1H, PMB), 3.81 (s, 3H, OMe), 3.74 (dd,  $J = 10.5, 5.9$  Hz, 1H, 1-H), 3.63 (dd,  $J = 10.5, 4.6$  Hz, 1H, 1-H), 3.61 (t,  $J = 6.8$  Hz, 2H, 24-H), 3.54-3.43 (m, 1H, 2-H), 1.63-1.49 (m, 4H), 1.37-1.19 (m, 38H), 1.08 (s, 9H, TBDPS), 0.91 (s, 9H, TBS), 0.06 (s, 6H, TBS);  $^{13}\text{C}$  NMR ( $\text{CDCl}_3$ ): 159.0 (PMP), 135.6 (Ar), 133.6 (Ar), 131.2 (Ar), 129.6 (Ar), 129.3 (Ar), 127.6 (Ar), 113.6 (PMP), 79.4 (2), 71.8 (PMB), 66.3 (1), 63.3 (24), 55.2 (OMe), 32.8 (23), 31.6 (3), [29.7, 29.6 and 29.4] (5 to 21), 26.8 (TBDPS), 26.0 (TBS), 25.8 (22), 25.4 (4), 19.2 (TBDPS), 18.4 (TBS), -5.3 (TBS); HR MS (ESI TOF): calcd for  $\text{C}_{54}\text{H}_{90}\text{O}_4\text{Si}_2\text{Na}$  ( $\text{M} + \text{Na}^+$ ) 881.6270, found 881.6249.

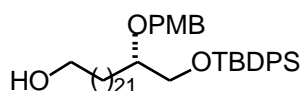

**(23S)-24-(*t*-Butyldiphenylsiloxy)-23-(*p*-methoxybenzyloxy)tetradecanol:**

To a solution of silyl ether **12** (254 mg, 0.296 mmol) in THF (30 mL) at 0 °C was added 1 M hydrochloric acid (14.8 mL). The reaction mixture was stirred for 6 h at room temperature and then saturated aqueous sodium hydrogencarbonate was added at 0 °C. The mixture was extracted with diethyl ether and the organic layer was washed with brine, dried over sodium sulfate. After filtration of the mixture and evaporation of the solvent, the crude product was purified by thin layer chromatography (eluant; hexane/ethyl acetate=5/1) to afford alcohol (23S)-24-(*t*-butyldiphenylsiloxy)-23-(*p*-methoxybenzyloxy)tetradecanol (216 mg, 99%) as a colorless oil:  $[\alpha]_{\text{D}}^{27} = -9.90$  (c 1.03, benzene); IR (neat):  $3357\text{ cm}^{-1}$ ;  $^1\text{H}$  NMR ( $\text{CDCl}_3$ ): 7.75-7.72 (m, 4H), 7.51-7.35 (m, 6H), 7.29-7.26 (m, 2H), 6.90-6.87 (m, 2H), 4.64 (d,  $J = 11.3$  Hz, 1H), 4.48 (d,  $J = 11.3$  Hz, 1H), 3.82 (s, 3H), 3.81-3.61 (m, 2H, 1-H), 3.65 (t,  $J = 6.6$  Hz, 2H, 24-H), 3.56-3.46 (m, 1H, 2-H), 1.65-1.18 (m, 42H), 1.11 (s, 9H);  $^{13}\text{C}$  NMR ( $\text{CDCl}_3$ ): 159.0 (PMP), 135.6 (Ar), 133.6 (Ar), 131.1 (Ar), 129.6 (Ar), 129.3 (Ar), 127.6 (Ar), 113.6 (PMP), 79.4 (2), 71.7 (PMB), 66.3 (1), 63.0 (24), 55.2 (OMe), 32.7 (23), 31.6 (3), [29.7, 29.6 and 29.4] (5 to 21), 26.8 (TBDPS), 25.7 (22), 25.3 (4), 19.2 (TBDPS); HR MS (ESI TOF): calcd for  $\text{C}_{48}\text{H}_{76}\text{O}_4\text{SiNa}$  ( $\text{M} + \text{Na}^+$ ) 767.5405, found 767.5406.

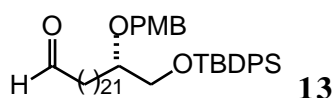

**(23S)-24-(*t*-Butyldiphenylsiloxy)-23-(*p*-methoxybenzyloxy)tetradecanal**

**(13):** To a solution of (23S)-24-(*t*-butyldiphenylsiloxy)-23-(*p*-methoxybenzyloxy)tetradecanol (100 mg, 0.134 mmol) in dichloromethane (1.5 mL)

was added PCC (43.3 mg, 0.201 mmol). The reaction mixture was stirred for 22 h at room temperature and then it was diluted with diethyl ether. After filtration of the mixture through a short pad of Celite and evaporation of the solvent, the crude product was purified by thin layer chromatography (eluant; hexane/ethyl acetate=3/1) to afford aldehyde **13** (85.0 mg, 85%) as a colorless oil:  $[\alpha]_D^{22} = -14.3$  (c 1.03, benzene); IR (neat): 1727  $\text{cm}^{-1}$ ;  $^1\text{H}$  NMR ( $\text{CDCl}_3$ ): 9.76 (s, 1H, CHO), 7.70-7.67 (m, 4H, TBDPS), 7.45-7.34 (m, 6H, TBDPS), 7.23 (d,  $J = 8.7$  Hz, 2H, PMP), 6.85 (d,  $J = 9.0$  Hz, 2H, PMP), 4.60 (d,  $J = 11.4$  Hz, 1H, PMB), 4.44 (d,  $J = 11.4$  Hz, 1H), 3.80 (s, 3H, PMB), 3.73 (dd,  $J = 11.9, 5.9$  Hz, 1H, 1-H), 3.62 (dd,  $J = 10.8, 4.8$  Hz, 1H, 1-H), 3.50-3.44 (m, 1H, 2-H), 2.42 (t, d,  $J = 7.4, 1.8$  Hz, 2H, 23-H), 1.65-1.44 (m, 4H, 3-H, 22-H), 1.35-1.18 (m, 38H, 4-H to 21-H), 1.06 (s, 9H, TBDPS);  $^{13}\text{C}$  NMR ( $\text{CDCl}_3$ ): 203.0 (24), 159.0 (PMP), 135.6 (Ar), 133.6 (Ar), 131.2 (Ar), 129.6 (Ar), 129.3 (Ar), 127.6 (Ar), 113.6 (PMP), 79.4 (2), 71.7 (PMB), 66.4 (1), 55.2 (OMe), 43.9 (23), 31.6 (3), [29.70, 29.63, 29.59, 29.41, 29.34 and 29.14] (5 to 21), 26.8 (TBDPS), 25.4 (4), 22.1 (22), 19.2 (TBDPS); HR MS (ESI TOF): calcd for  $\text{C}_{48}\text{H}_{74}\text{O}_4\text{SiNa}$  ( $\text{M} + \text{Na}^+$ ) 765.5249, found 765.5270.

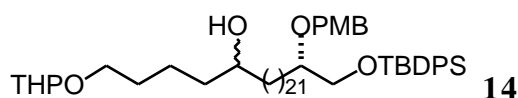

**(2S)-1-(*t*-Butyldiphenylsiloxy)-2-(*p*-methoxybenzyloxy)-28-(tetrahydro-2H-pyran-2-yloxy)octacosane-24-ol (**14**):** To a solution of aldehyde **13** (565 mg, 0.760 mmol) in THF (2.5 mL) at 0 °C was added a solution of Grignard reagent **B** (0.556 M, 3.0 mL, 16.7 mmol). The reaction mixture was stirred for 1.5 h at 0 °C and then saturated aqueous ammonium chloride was added. The mixture was extracted with diethyl ether and the organic layer was washed with brine, dried over sodium sulfate. After filtration of the mixture and evaporation of the solvent, the crude product was purified by column chromatography (eluant; hexane/ethyl acetate=10/1) to afford alcohol **14** (557 mg, 81%) as a colorless oil: IR (neat): 3448  $\text{cm}^{-1}$ ;  $^1\text{H}$  NMR ( $\text{CDCl}_3$ ): 7.78-7.64 (m, 4H, TBDPS), 7.47-7.33 (m, 6H, TBDPS), 7.28-7.20 (m, 2H, PMP), 6.89-6.81 (m, 2H, PMP), 4.61 (d,  $J = 11.1$  Hz, 1H, PMB), 4.59 (s, 1H, THP), 4.45 (d,  $J = 11.1$  Hz, 1H, PMB), 3.93-3.36 (m, 8H, 1-H, 2-H, 24-H, 28-H, THP), 3.80 (s, 3H, OMe), 1.89-1.15 (m, 54H);  $^{13}\text{C}$  NMR ( $\text{CDCl}_3$ ): 159.0 (PMP), 135.6 (Ar), 133.6 (Ar), 131.2 (Ar), 129.6 (Ar), 129.3 (Ar), 127.6 (Ar), 113.6 (PMP), 98.9 (THP), 79.4 (2), 71.7 (PMB), 67.5 (24), 66.4 (1), 64.3 (28), 62.3 (THP), 55.2 (OMe), 37.5 (23), 37.1 (25), 31.6 (3), 30.7 (27), [29.7 and 29.6] (5 to 21), 26.8 (TBDPS), [25.6 and 25.3] (4, 26), 22.3 (22), 19.6 (TBDPS), 19.2 (THP); HR MS (ESI TOF): calcd for  $\text{C}_{57}\text{H}_{92}\text{O}_6\text{SiNa}$  ( $\text{M} + \text{Na}^+$ ) 923.6555, found 923.6554.



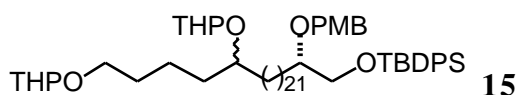

**(2S)-1-(*t*-Butyldiphenylsiloxy)-2-(*p*-methoxybenzyloxy)-24,28-di(tetrahydro-2H-pyran-2-yloxy)octacosane (15):** To a solution of alcohol **14** (1.38 mg, 1.53 mmol) and 3,4-dihydro-2H-pyran (0.200 mL, 2.19 mmol) in dichloromethane (6 mL) at 0 °C was added *p*-toluenesulfonic acid monohydrate (32.7 mg, 0.190 mmol). The reaction mixture had been stirred for 2 h at room temperature and then saturated aqueous sodium hydrogencarbonate was added. The mixture was extracted with dichloromethane and the organic layer was washed with brine, dried over sodium sulfate. After filtration of the mixture and evaporation of the solvent, the crude product was purified by column chromatography (eluant; hexane/ethyl acetate=15/1) to afford THP ether **15** (1.30 g, 86%) as a colorless oil: IR (neat): 3070, 3044, 2924, 2853  $\text{cm}^{-1}$ ;  $^1\text{H}$  NMR ( $\text{CDCl}_3$ ): 7.71-7.67 (m, 4H, TBDPS), 7.47-7.35 (m, 6H, TBDPS), 7.26-7.17 (m, 2H, PMP), 6.88-6.80 (m, 2H, PMP), 4.60 (d,  $J = 11.1$  Hz, 1H, PMB), 4.58 (s, 1H, THP), 4.44 (d,  $J = 11.3$  Hz, 1H, PMB), 3.92-3.32 (m, 8H, 1-H, 2-H, 24-H, 28-H, THP), 3.80 (s, 3H, OMe), 1.88-1.11 (m, 54H), 1.07 (s, 9H, TBDPS);  $^{13}\text{C}$  NMR ( $\text{CDCl}_3$ ): 158.9 (PMP), 135.6 (Ar), 133.6 (Ar), 131.1 (Ar), 129.6 (Ar), 129.3 (Ar), 127.6 (Ar), 113.6 (PMP), 100.5 (THP), 95.4 (THP), 79.4 (2), 71.8 (PMB), 67.5 (24), 66.4 (1), 62.7 (28), 62.2 (THP), 62.1 (THP), 55.3 (OMe), 35.0 (23), 34.8 (25), 30.8 (3), 30.7 (27), [29.9 and 29.5] (5 to 21), 26.8 (TBDPS), [25.5 and 25.0] (4, 26), 22.3 (22), 20.0 (TBDPS), 19.7 (THP), 19.6 (THP); HR MS (ESI TOF): calcd for  $\text{C}_{62}\text{H}_{100}\text{O}_7\text{SiNa}$  ( $\text{M} + \text{Na}^+$ ) 1007.7131, found 1007.7123.

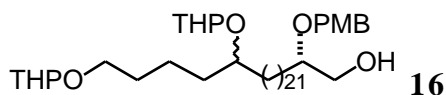

**(2S)-2-(*p*-Methoxybenzyloxy)-24,28-di(tetrahydro-2H-pyran-2-yloxy)octacosanol (16):** To a solution of TBDPS ether **15** (655 mg, 0.664 mmol) in THF (7.2 mL) at 0 °C were added acetic acid (0.12 mL, 2.10 mmol) and a solution of TBAF in THF (1.0 M, 2.00 mL, 2.00 mmol). After the reaction mixture had been stirred for 22.5 h at room temperature, saturated aqueous sodium hydrogencarbonate was added. The mixture was extracted with ethyl acetate, and the organic layer was washed with water and brine, dried over sodium sulfate. After filtration of the mixture and evaporation of the solvent, the crude product was purified by column chromatography (eluant; hexane/ethyl acetate=3/1) to afford alcohol **16** (474 mg, 96%) as a colorless oil: IR (neat): 3466  $\text{cm}^{-1}$ ;  $^1\text{H}$  NMR ( $\text{CDCl}_3$ ): 7.27 (d,  $J = 8.4$  Hz, 2H, PMP), 6.91-6.86 (m, 2H, PMP), 4.67-4.62 (m, 1H, THP), 4.60-4.55 (m, 1H, THP), 4.56 (d,  $J = 11.3$

Hz, 1H, PMB), 4.46 (d,  $J = 11.1$  Hz, 1H, PMB), 3.95-3.34 (m, 10H, 1-H, 2-H, 24-H, 28-H, THP), 3.81 (s, 3H, OMe), 1.86-1.38 (m, 20H, 3-H, 23-H, 25-H, 27-H, THP), 1.38-1.16 (m, 40H);  $^{13}\text{C}$  NMR ( $\text{CDCl}_3$ ): 159.2 (PMP), 130.6 (PMP), 129.3 (PMP), 113.8 (PMP), 98.8 (THP), 97.6 (THP), 79.4 (2), 71.1 (PMB), 67.5 (24), 64.3 (1), 62.7 (28), 62.3 (THP), 62.2 (THP), 55.3 (OMe), 35.0 (23), 34.8 (25), 30.8 (3), 30.7 (27), [29.9 and 29.5] (5 to 21), [25.5 and 25.0] (4, 26), 22.3 (22), 20.0 (THP), 19.6 (THP); HR MS (ESI TOF): calcd for  $\text{C}_{46}\text{H}_{82}\text{O}_7\text{Na}$  ( $\text{M} + \text{Na}^+$ ) 769.5953, found 769.5953.

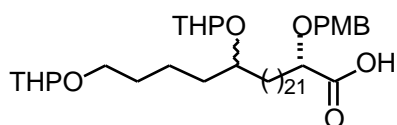

**(2S)-2-(*p*-Methoxybenzyloxy)-24,28-di(tetrahydro-2H-pyran-2-**

**ylxy)octacosanoic acid:** To a solution of alcohol **16** (588.1 mg, 0.787 mmol) in acetonitrile (3.9 mL) at room temperature were added TEMPO (18.0 mg, 0.110 mmol) and phosphate buffer (pH=7, 2.95 mL). After the reaction mixture had been warmed up to 35 °C, a solution of sodium chlorite in water (2.0 M, 0.394 mL, 3.15 mmol) and a solution of sodium hypochlorite in water (available chlorine >0.25%, 0.414 mL, 31.5  $\mu\text{mol}$ ) were added. The mixture was stirred for 8.5 h at 35 °C and then water (5.9 mL) was added at room temperature. A solution of 6% sodium sulfite in water was added to the reaction mixture at 0 °C, and the solution was acidified to pH=6 by addition of 1 M hydrochloric acid. The mixture was extracted with diethyl ether, and the organic layer was filtered through a short pad of silica eluting with chloroform/methanol=10/1. Evaporation of the solvent gave (2S)-2-(*p*-methoxybenzyloxy)-24,28-di(tetrahydro-2H-pyran-2-yloxy)octacosanoic acid (604 mg, quant.) as a colorless oil. The crude product was instantly used in the following reaction without further purification. For the analysis, the carboxylic acid was purified by column chromatography (eluant;  $\text{CH}_2\text{Cl}_2 \Rightarrow 5\%$  MeOH in  $\text{CH}_2\text{Cl}_2$ ) on Silica gel 60N (spherical, neutral, Kanto Chem. Co., Inc.) and the resulted salt was washed with hexane under argon atmosphere to give pure (2S)-2-(*p*-methoxybenzyloxy)-24,28-di(tetrahydro-2H-pyran-2-yloxy)octacosanoic acid as a colorless oil: IR (neat): 3446, 1700  $\text{cm}^{-1}$ ;  $^1\text{H}$  NMR ( $\text{CDCl}_3$ ): 7.27 (d,  $J = 8.7$  Hz, 2H, PMP), 6.89 (d,  $J = 8.7$  Hz, 2H, PMP), 4.58 (s, 2H, THP), 4.55 (d,  $J = 11.3$  Hz, 1H, PMB), 4.47 (d,  $J = 11.1$  Hz, 1H, PMB), 3.93-3.34 (m, 8H, 2-H, 24-H, 28-H, THP), 3.80 (s, 3H, OMe), 1.95-1.16 (m, 60H); HR MS (ESI TOF): calcd for  $\text{C}_{46}\text{H}_{80}\text{O}_8\text{Na}$  ( $\text{M} + \text{Na}^+$ ) 783.5745, found 783.5739.

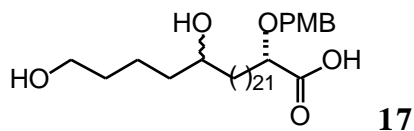

**(2S)-24,28-Dihydroxy-2-(p-methoxybenzyloxy)octacosanoic acid (17):** To a solution of crude (2S)-2-(p-methoxybenzyloxy)-24,28-di(tetrahydro-2H-pyran-2-yloxy)octacosanoic acid (604 mg, 0.793 mmol) in THF (40 mL) at 0 °C was added 1 M hydrochloric acid (4 mL). The reaction mixture was stirred for 71 h at room temperature. The mixture was extracted with ethyl acetate and the organic layer was washed with brine, dried over sodium sulfate. After filtration of the mixture and evaporation of the solvent, the crude product was purified by thin layer chromatography (eluant; dichloromethane/methanol=10/1) to afford -hydroxycarboxylic acid **17** (262.3 mg, 56% for 2 steps) as a white solid: Mp. 62-63 °C; IR (neat): 3416, 1716  $\text{cm}^{-1}$ ;  $^1\text{H}$  NMR ( $\text{CDCl}_3$ ): 7.29-7.26 (m, 2H, PMP), 6.92-6.87 (m, 2H, PMP), 4.60 (d,  $J = 11.4$  Hz, 1H, PMB), 4.46 (d,  $J = 11.4$  Hz, 1H, PMB), 3.98 (t,  $J = 5.9$  Hz, 1H, 2-H), 3.81 (s, 3H, OMe), 3.67 (t,  $J = 6.3$  Hz, 2H, 28-H), 3.61 (m, 1H, 24-H), 1.82-1.72 (m, 2H), 1.61-1.25 (m, 48H);  $^{13}\text{C}$  NMR ( $\text{CDCl}_3$ ): 174.7 (1), 159.3 (PMP), 129.8 (PMP), 129.0 (PMP), 113.9 (PMP), 72.3 (2), 72.0 (PMB), 70.0 (24), 62.8 (28), 55.3 (OMe), 37.5 (23), 36.9 (25), 32.5 (26), 32.3 (3), [29.6 and 29.4] (5 to 21), 29.2 (27), [25.6 and 24.8] (4, 26), 21.8 (22); HR MS (ESI TOF): calcd for  $\text{C}_{36}\text{H}_{64}\text{O}_6\text{Na}$  ( $\text{M} + \text{Na}^+$ ) 615.4595, found 615.4597.

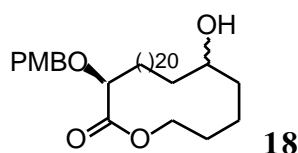

**(2S)-24-Hydroxy-2-(p-methoxybenzyloxy)octacosanolide (18):** To a solution of MNBA (24.8 mg, 72.0  $\mu\text{mol}$ ), DMAPO (1.7 mg, 12.3  $\mu\text{mol}$ ) and triethylamine (0.02 mL, 0.161 mmol) in dichloromethane (9.6 mL) at 50 °C was slowly added a solution of seco-acid **17** (31.8 mg, 53.6  $\mu\text{mol}$ ) in THF (16.3 mL) with a mechanically driven syringe over a 12 h period. After the reaction mixture had been stirred for 1 h at room temperature, saturated aqueous sodium hydrogencarbonate was added at 0 °C. The mixture was extracted with dichloromethane, and the organic layer was washed with water and brine, and dried over sodium sulfate. After filtration of the mixture and evaporation of the solvent, the crude product was purified by thin layer chromatography (eluant; hexane/ethyl acetate=3/1) to afford lactone **18** (23.6 mg, 77%) as a colorless oil: IR (neat): 3446, 1636  $\text{cm}^{-1}$ ;  $^1\text{H}$  NMR ( $\text{CDCl}_3$ ): 7.28 (d,  $J = 8.5$  Hz, 2H, PMP), 6.88 (d,  $J = 8.5$  Hz, 2H, PMP), 4.63 (d,  $J = 11.0$  Hz, 1H, PMB), 4.34 (d,  $J = 11.0$  Hz, 1H, PMB), 4.22-4.18 (m, 1H, 28-H), 4.16-4.09 (m, 1H, 28-H), 3.90 (t,

$J = 6.5$  Hz, 1H, 2-H), 3.80 (s, 3H, OMe), 3.66-3.55 (m, 1H, 24-H), 1.76-1.26 (m, 48H);  $^{13}\text{C}$  NMR ( $\text{CDCl}_3$ ): 174.0 (1), 159.3 (PMP), 131.9 (PMP), 129.7 (PMP), 113.7 (PMP), 77.4 (2), 71.8 (24), 71.6 (PMB), 64.7 (28), 55.3 (OMe), 37.3 (23), 36.8 (25), 33.0 (3), [29.35, 29.25, 29.17, 29.10, 29.03, 28.90, 28.86, 28.75, 28.66, 28.61 and 28.56] (5 to 21), 25.4 (26), 25.3 (4), 25.0 (22), 22.1 (27); HR MS (ESI TOF): calcd for  $\text{C}_{36}\text{H}_{62}\text{O}_5\text{Na}$  ( $\text{M} + \text{Na}^+$ ) 597.4489, found 597.4489.

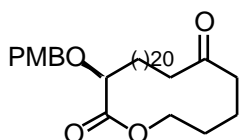

**(2S)-2-(*p*-Methoxybenzyloxy)-24-oxooctacosanolide:** To a mixture of MS 4Å (3.1 mg) and alcohol **18** (3.20 mg, 5.57  $\mu\text{mol}$ ) in dichloromethane (0.5 mL) at room temperature was added NMO (1.84 mg, 15.7  $\mu\text{mol}$ ). After the reaction mixture had been stirred for 5 min at room temperature, TPAP (0.37 mg, 1.05  $\mu\text{mol}$ ) was added at 0 °C. The reaction mixture was stirred for 30 min at 0 °C and then it was filtered through a pre-cooled short pad of silica gel eluting with ethyl acetate. The mixture and evaporation of the solvent, the crude product was purified by thin layer chromatography (eluant; benzene/diethyl ether=3/1) to afford (2S)-2-(*p*-methoxybenzyloxy)-24-oxooctacosanolide (3.0 mg, 94%) as a colorless oil:  $[\alpha]_{\text{D}}^{22} = -34.4$  (c 0.753, benzene); IR (neat): 1737, 1712  $\text{cm}^{-1}$ ;  $^1\text{H}$  NMR ( $\text{CDCl}_3$ ): 7.30-7.26 (m, 2H, PMP), 6.90-6.84 (m, 2H, PMP), 4.62 (d,  $J = 11.1$  Hz, 1H, PMB), 4.33 (d,  $J = 11.3$  Hz, 1H, PMB), 4.20-4.07 (m, 2H, 28-H), 3.89 (t,  $J = 6.5$  Hz, 1H, 2-H), 3.80 (s, 3H, OMe), 2.45 (t,  $J = 7.0$  Hz, 2H, 25-H), 2.38 (t,  $J = 7.4$  Hz, 2H, 23-H), 1.78-1.50 (m, 10H), 1.45-1.18 (m, 34H);  $^{13}\text{C}$  NMR ( $\text{CDCl}_3$ ): 210.8 (24), 173.0 (1), 159.3 (PMP), 132.7 (PMP), 129.7 (PMP), 113.3 (PMP), 71.9 (2), 64.4 (28), 55.3 (OMe), 42.8 (23), 42.0 (25), 33.0 (3), [29.32, 29.23, 29.18, 29.09, 28.98, 28.78, 28.72, 28.64 and 28.59] (5 to 21), 28.2 (26), 25.2 (4), 23.8 (22), 20.3 (27); HR MS (ESI TOF): calcd for  $\text{C}_{36}\text{H}_{60}\text{O}_5\text{Na}$  ( $\text{M} + \text{Na}^+$ ) 595.4333, found 595.4333.

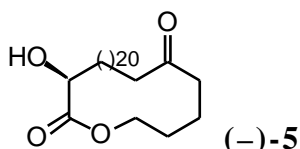

**(2S)-2-Hydroxy-24-oxooctacosanolide ((-)-5):** To a suspension of (2S)-2-(*p*-methoxybenzyloxy)-24-oxooctacosanolide (3.00 mg, 5.20  $\mu\text{mol}$ ) in dichloromethane (0.47 mL) and water (0.05 mL) at 0 °C was added DDQ (1.43 mg, 6.30  $\mu\text{mol}$ ). The reaction mixture was stirred for 2.5 h at room temperature and then phosphate buffer (pH=7) was added. The mixture was extracted with dichloromethane, and the organic

layer was washed with water and brine, dried over sodium sulfate. After filtration of the mixture and evaporation of the solvent, the crude product was purified by thin layer chromatography (eluant; benzene/diethyl ether=3/1) to afford (2*S*)-2-hydroxy-24-oxooctacosanolide ((-)-**5**) (1.9 mg, 80%) as a white solid: Mp. 67-68 °C;  $[\alpha]_D^{21} = -9.6$  (c 0.96, benzene); IR (neat): 3445, 1739, 1713  $\text{cm}^{-1}$ ;  $^1\text{H}$  NMR ( $\text{CDCl}_3$ ): 4.28-4.24 (m, 1H, 28-H), 4.18-4.16 (m, 1H, 2-H), 4.13-4.09 (m, 1H, 28-H), 2.45 (t,  $J = 7.0$  Hz, 2H, 25-H), 2.40 (t,  $J = 7.5$  Hz, 2H, 23-H), 1.81-1.75 (m, 2H, 3-H), 1.69-1.63 (m, 2H, 27-H), 1.67-1.61 (m, 2H, 26-H), 1.61-1.56 (m, 2H, 22-H), 1.56-1.45 (m, 2H, 4-H), 1.45-1.17 (m, 34H, 5-H to 21-H);  $^{13}\text{C}$  NMR ( $\text{CDCl}_3$ ): 210.7 (24), 175.6 (1), 70.4 (2), 65.4 (28), 42.8 (23), 42.0 (25), 34.4 (3), [29.40, 29.29, 29.27, 29.20, 29.12, 28.98, 28.92, 28.89, 28.81, 28.74, 28.72, 28.67, 28.60, 28.58, 28.50] (5 to 21), 28.1 (26), 24.7 (4), 23.7 (22), 20.2 (27); HR MS (ESI TOF): calcd for  $\text{C}_{28}\text{H}_{52}\text{O}_4\text{Na}$  ( $\text{M} + \text{Na}^+$ ) 475.3758, found 475.3758.

#### (Natural Product **5**)<sup>2</sup>

Amorphous solid;  $^1\text{H}$  NMR ( $\text{CDCl}_3$ ): 4.24 and 4.10 (m, 2H, 28-H), 4.15 (m, 1H, 2-H), 2.73 (d,  $J = 5$  Hz, 1H, OH), 2.44 (t,  $J = 6.5$  Hz, 2H, 25-H), 2.38 (t,  $J = 7$  Hz, 2H, 23-H), 1.76 and 1.63 (m, 2H, 3-H), 1.65 (m, 2H, 27-H), 1.63 (m, 2H, 26-H), 1.58 (m, 2H, 22-H), 1.45-1.30 (m, 2H, 4-H), 1.25 (m, 34H, 5-H to 21-H);  $^{13}\text{C}$  NMR ( $\text{CDCl}_3$ ): 210.4 (24), 176.2 (1), 71.1 (2), 66.0 (28), 43.5 (23), 42.7 (25), 35.1 (3), 29.0 (5 to 21), 28.8 (26), 25.3 (4), 24.4 (22), 20.8 (27);  $\text{M}^+$  at  $m/z$  452.3867 (calcd for  $\text{C}_{28}\text{H}_{50}\text{O}_4$  452.3865).

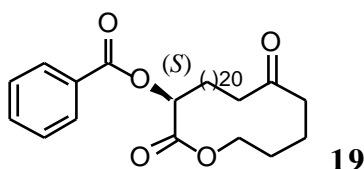

**(2*S*)-2-Benzoyloxy-24-oxooctacosanolide (19):** To a solution of (2*S*)-2-hydroxy-24-oxooctacosanolide ((-)-**5**) (1.00 mg, 2.21  $\mu\text{mol}$ ) in dichloromethane (0.2 mL) at 0 °C were added DMAP (0.60 mg, 5.3  $\mu\text{mol}$ ) and benzoic anhydride (1.43 mg, 6.30  $\mu\text{mol}$ ). The reaction mixture was stirred for 21 h at room temperature and then saturated aqueous sodium hydrogencarbonate was added. The mixture was extracted with dichloromethane, and the organic layer was washed with water and brine, dried over sodium sulfate. After filtration of the mixture and evaporation of the solvent, the crude product was purified by thin layer chromatography (eluant; hexane/ethyl acetate=5/1) to afford benzoate **19** (1.2 mg, quant.) as a colorless oil: IR (neat): 1757, 1726  $\text{cm}^{-1}$ ;  $^1\text{H}$  NMR ( $\text{CDCl}_3$ ): 8.10-8.07 (m, 2H, Bz), 7.65-7.55 (m, 1H, Bz), 7.48-7.31 (m, 2H, Bz), 5.21 (t,  $J = 6.8$  Hz, 1H, 2-H), 4.23-4.16 (m, 2H, 28-H), 2.43 (t,  $J$

= 6.8 Hz, 2H, 25-H), 2.38 (t,  $J$  = 7.3 Hz, 2H, 23-H), 1.82-1.48 (m, 2H, 3-H), 1.70-1.62 (m, 2H, 26-H), 1.70-1.62 (m, 2H, 27-H), 1.62-1.48 (m, 2H, 22-H), 1.62-1.48 (m, 2H, 4-H), 1.27-1.25 (m, 34H, 5-H to 21-H); HPLC (CHIRALCEL OD-H\*2, *i*-PrOH/hexane = 1/20, flow rate = 0.3 mL/min):  $t_R$  = 46.6 min (<1%),  $t_R$  = 47.6 min (>99%); HR MS (ESI TOF): calcd for C<sub>35</sub>H<sub>56</sub>O<sub>5</sub>Na (M + Na<sup>+</sup>) 579.4020, found 579.4020.

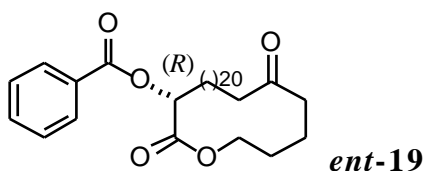

**(2R)-2-Benzoyloxy-24-oxooctacosanolide (*ent*-19):** To a solution of (2*S*)-2-hydroxy-24-oxooctacosanolide((-)-**5**) (1.40 mg, 1.89  $\mu$ mol), benzoic acid (1.40 mg, 11.4  $\mu$ mol) and triphenylphosphine (2.30 mg, 8.70  $\mu$ mol) in THF (0.1 mL) at 0 °C was added DEAD (5.00 mg, 28.3  $\mu$ mol). The reaction mixture was stirred for 9 h at room temperature and then saturated aqueous sodium hydrogencarbonate was added. The mixture was extracted with diethyl ether, and the organic layer was washed with water and brine, dried over sodium sulfate. After filtration of the mixture and evaporation of the solvent, the crude product was purified by thin layer chromatography (eluant; hexane/ethyl acetate=5/1) to afford benzoate ***ent*-19** (1.7 mg, quant.) as a colorless oil: IR (neat): 1752, 1730 cm<sup>-1</sup>; <sup>1</sup>H NMR (CDCl<sub>3</sub>): 8.10-8.07 (m, 2H, Bz), 7.65-7.55 (m, 1H, Bz), 7.48-7.31 (m, 2H, Bz), 5.21 (t,  $J$  = 6.8 Hz, 1H, 2-H), 4.23-4.16 (m, 2H, 28-H), 2.43 (t,  $J$  = 6.8 Hz, 2H, 25-H), 2.38 (t,  $J$  = 7.3 Hz, 2H, 23-H), 1.82-1.48 (m, 2H, 3-H), 1.70-1.62 (m, 2H, 26-H), 1.70-1.62 (m, 2H, 27-H), 1.62-1.48 (m, 2H, 22-H), 1.62-1.48 (m, 2H, 4-H), 1.27-1.25 (m, 34H, 5-H to 21-H); HPLC (CHIRALCEL OD-H\*2, *i*-PrOH/hexane = 1/20, flow rate = 0.3 mL/min):  $t_R$  = 46.6 min (>99%),  $t_R$  = 47.6 min (<1%); HR MS (ESI TOF): calcd for C<sub>35</sub>H<sub>56</sub>O<sub>5</sub>Na (M + Na<sup>+</sup>) 579.4020, found 579.4020.

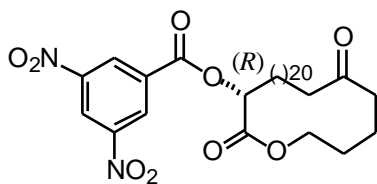

**(2R)-2-(3,5-Dinitrobenzoyloxy)-24-oxooctacosanolide:** To a solution of (2S)-2-hydroxy-24-oxooctacosanolide ((-)-**5**) (5.40 mg, 11.9  $\mu$ mol), triphenylphosphine (6.50 mg, 24.8  $\mu$ mol) and 3,5-dinitrobenzoic (6.50 mg, 30.6  $\mu$ mol) acid in THF (0.12 mL) at room temperature was added diisopropyl azodicarboxylate (4.80 mg, 23.9  $\mu$ mol). The reaction mixture was stirred for 2 h at room temperature and then saturated aqueous sodium hydrogencarbonate was added. The mixture was extracted with hexane and the organic layer was washed with water and brine, dried over sodium sulfate. After filtration of the mixture and evaporation of the solvent, the crude product was purified by thin layer chromatography (eluant; hexane/ethyl acetate=3/1) to afford dinitrobenzoate (2R)-2-(3,5-dinitrobenzoyloxy)-24-oxooctacosanolide (6.0 mg, 78%) and recovered (-)-**5** (1.2 mg, 22%) as colorless oils.

**(2R)-2-(3,5-Dinitrobenzoyloxy)-24-oxooctacosanolide:**

IR (neat): 1736, 1714, 1547  $\text{cm}^{-1}$ ;

$^1\text{H}$  NMR ( $\text{CDCl}_3$ ): 9.26 (t,  $J = 2.0$  Hz, 1H, Ar), 9.19 (t,  $J = 2.0$  Hz, 2H, Ar), 5.32 (dd,  $J = 12.5, 5.0$  Hz, 1H, 2-H), 4.24-4.21 (m, 1H, 28-H), 4.18-4.15 (m, 1H, 28-H), 2.45 (t,  $J = 6.0$  Hz, 2H, 25-H), 2.40 (t,  $J = 7.0$  Hz, 2H, 23-H), 2.08-2.03 (m, 2H, 3-H), 1.67-1.66 (m, 2H, 27-H), 1.67-1.66 (m, 2H, 26-H), 1.55-1.49 (m, 2H, 4-H), 1.48-1.39 (m, 2H, 22-H), 1.35-1.25 (m, 34H, 5-H to 21-H);

HR MS (ESI TOF): calcd for  $\text{C}_{35}\text{H}_{54}\text{N}_2\text{O}_9\text{Na}$  ( $\text{M} + \text{Na}^+$ ) 669.3722, found 669.3722.

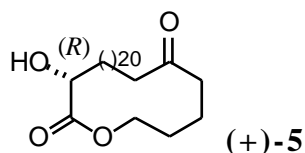

**(2R)-2-Hydroxy-24-oxooctacosanolide ((+)-5):** To a solution of dinitrobenzoate **(2R)-2-(3,5-dinitrobenzoyloxy)-24-oxooctacosanolide** (6.00 mg, 9.28  $\mu\text{mol}$ ) in methanol (0.1 mL) at room temperature was added triethylamine (6.5  $\mu\text{L}$ ). The reaction mixture was stirred for 30 min at room temperature and then saturated aqueous sodium hydrogencarbonate was added at 0 °C. The mixture was extracted with ethyl acetate and the organic layer was washed with brine, dried over sodium sulfate. After filtration of the mixture and evaporation of the solvent, the crude product was purified by thin layer chromatography (eluant; hexane/ethyl acetate=3/1) to afford (2R)-2-hydroxy-24-oxooctacosanolide ((+)-**5**) (3.5 mg, 83%) as a colorless oil:

Mp. 69-70 °C;

$[\alpha]_{\text{D}}^{22} = +9.54^\circ$  (c 0.44, benzene);

HR MS (ESI TOF): calcd for  $\text{C}_{28}\text{H}_{52}\text{O}_4\text{Na}$  ( $\text{M} + \text{Na}^+$ ) 475.3758, found 475.3758.



- 
- (1) Toshima, H.; Maru, K.; Saito, M.; Ichikawa, A. *Tetrahedron* **1999**, *55*, 5793-5808.
  - (2) Plasman, V.; Daloze, D.; Braekman, J.-C.; Connétable, S.; Robert, A.; Bordereau, C. *Tetrahedron Lett.* **1999**, *40*, 9229-9232.

acetal

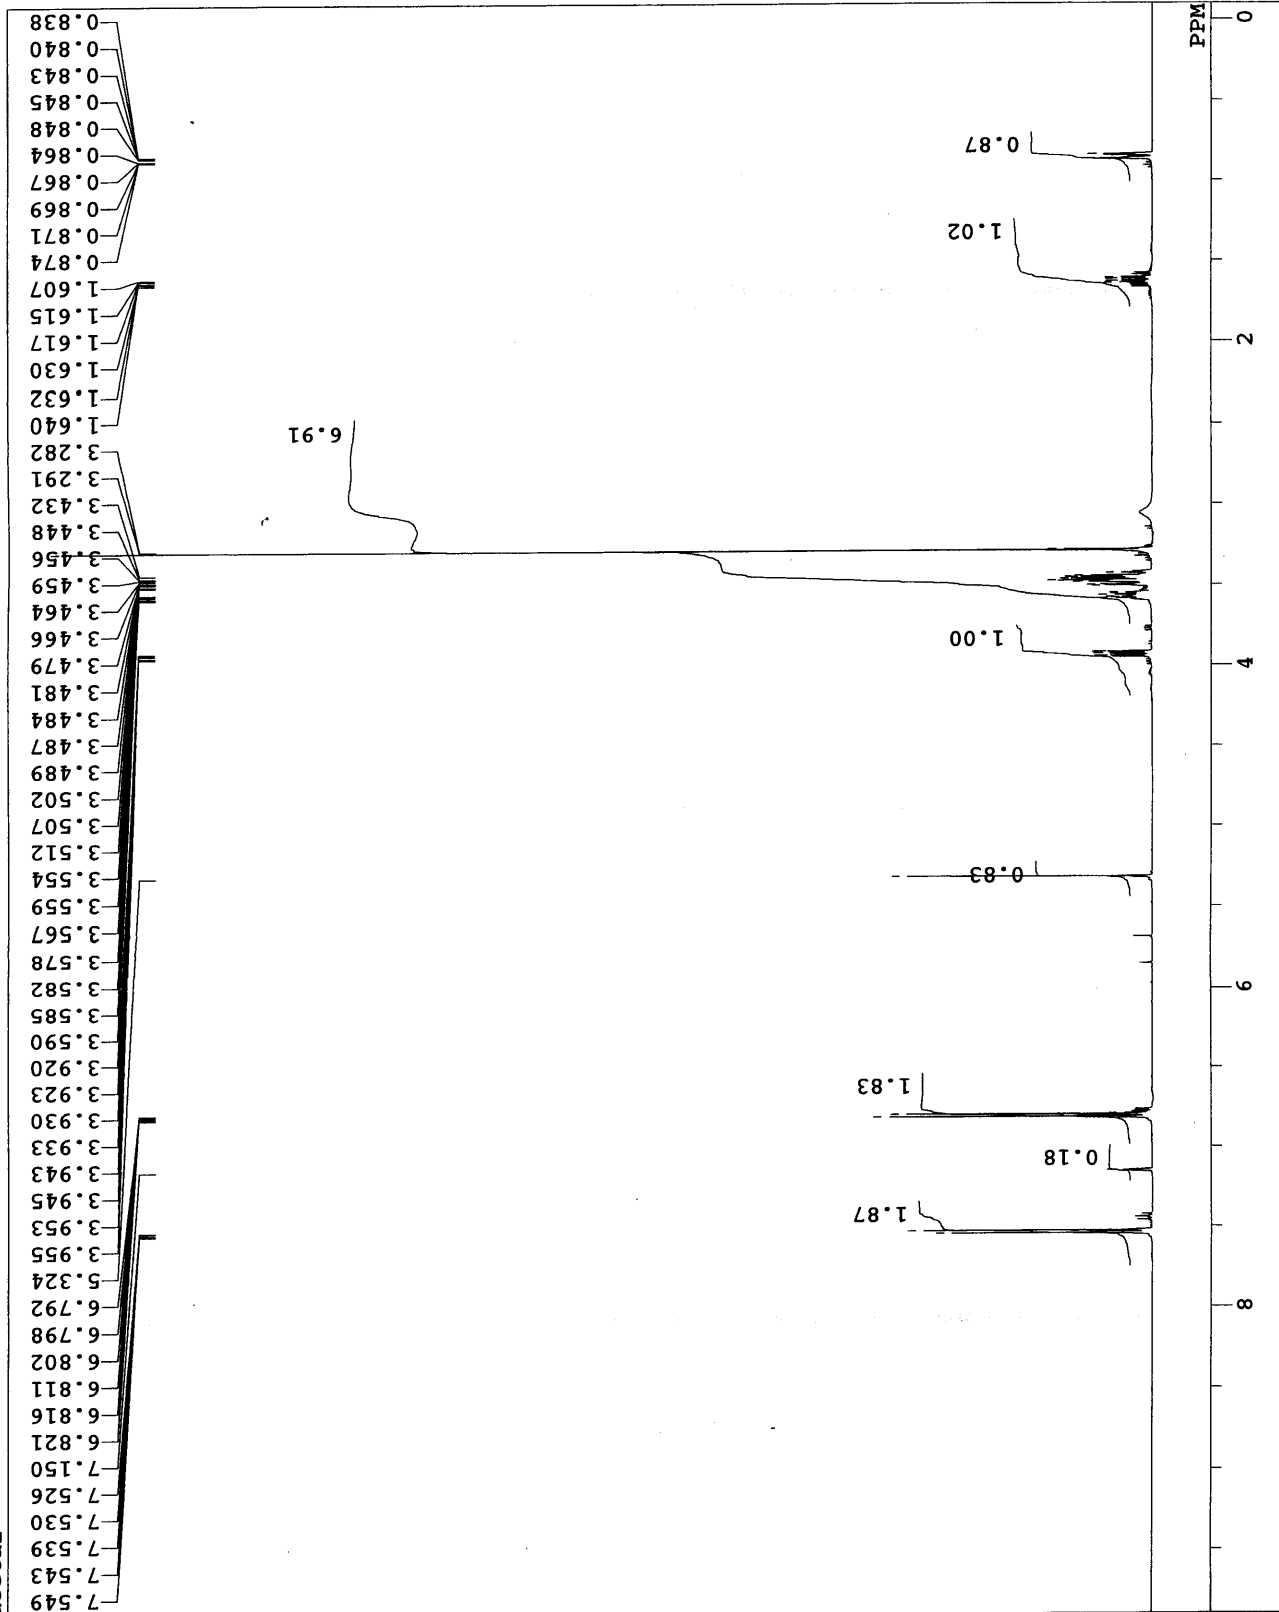

DFILE C:\WinLambda\TEMPDATA\Autolnon\_E1  
 OBNUC 1H  
 EXMOD non  
 OFR 500.00 MHz  
 OBSET 0.00 KHz  
 OBFIN 162160.00 Hz  
 POINT 32768  
 FREQU 10000.00 Hz  
 SCANS 8  
 ACQTM 3.2768 sec  
 PD 3.7232 sec  
 PW1 6.38 usec  
 IRN 25.0 C  
 CTEMP C6D6  
 SLVNT 7.15 ppm  
 EXREF 0.12 Hz  
 BF 10  
 RGAIN

18-TM

DFILE COMNT  
18-TM  
DATIM Wed Jun 01 10:52:25 2005  
OBNUC 1H  
EXMOD NON  
OBFRQ 300.40 MHz  
OBSET 130.00 KHz  
OBFIN 1150.0 Hz  
POINT 32768  
FREQU 6020.4 Hz  
SCANS 64  
ACQTM 5.443 sec  
PD 1.554 sec  
PW1 5.4 us  
IRNUC 1H  
CTEMP 21.0 c  
SLVNT C6D6  
EXREF 7.15 ppm  
BF 0.12 Hz  
RGAIN 18

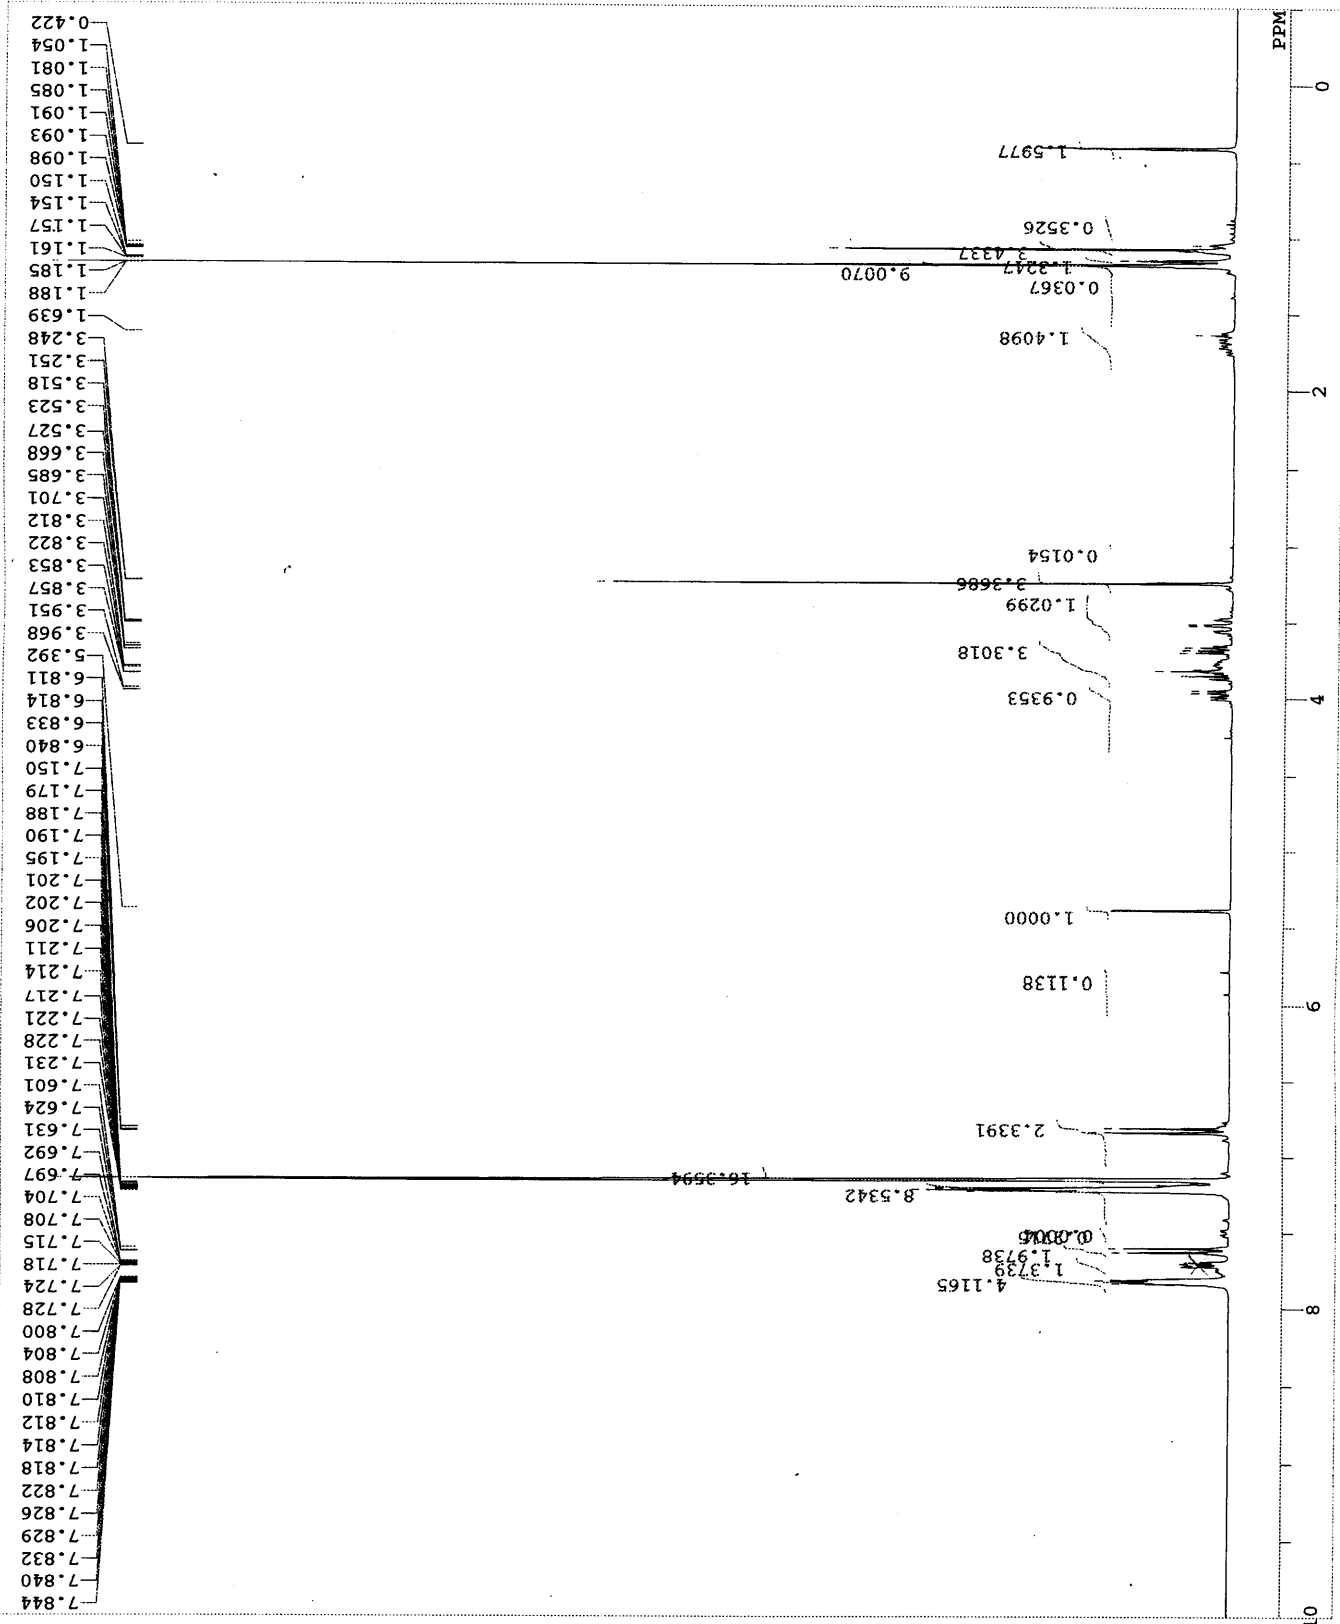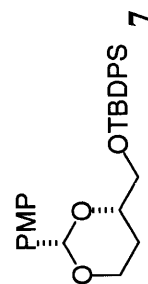



DFILE COMNT R44\_2  
 DATIM Sun Aug 28 17:42:37 2005  
 EXMOD BCM  
 OBNUC 13C  
 OBFRQ 67.80 MHz  
 OBSET 135.00 KHz  
 OBFIN 5200.0 Hz  
 POINT 32768  
 FREQU 18348.6 Hz  
 CLPNT 1  
 TODAT 1  
 CLFRQ 500.0 Hz  
 SCANS 512  
 ACQTM 1.786 sec  
 PD 1.211 sec  
 PW1 3.8 us  
 PW2 10.0 us  
 PW3 10.0 us  
 P11 1.000 ms  
 P12 1.000 ms  
 P13 1.00 ms  
 IRNUC 1H  
 CTEMP 20.9 C  
 SLVNT CDCL3  
 EXREF 77.00 ppm  
 CLEXR 0.00  
 RGAIN 30  
 OBATN 511  
 LOOP1 1

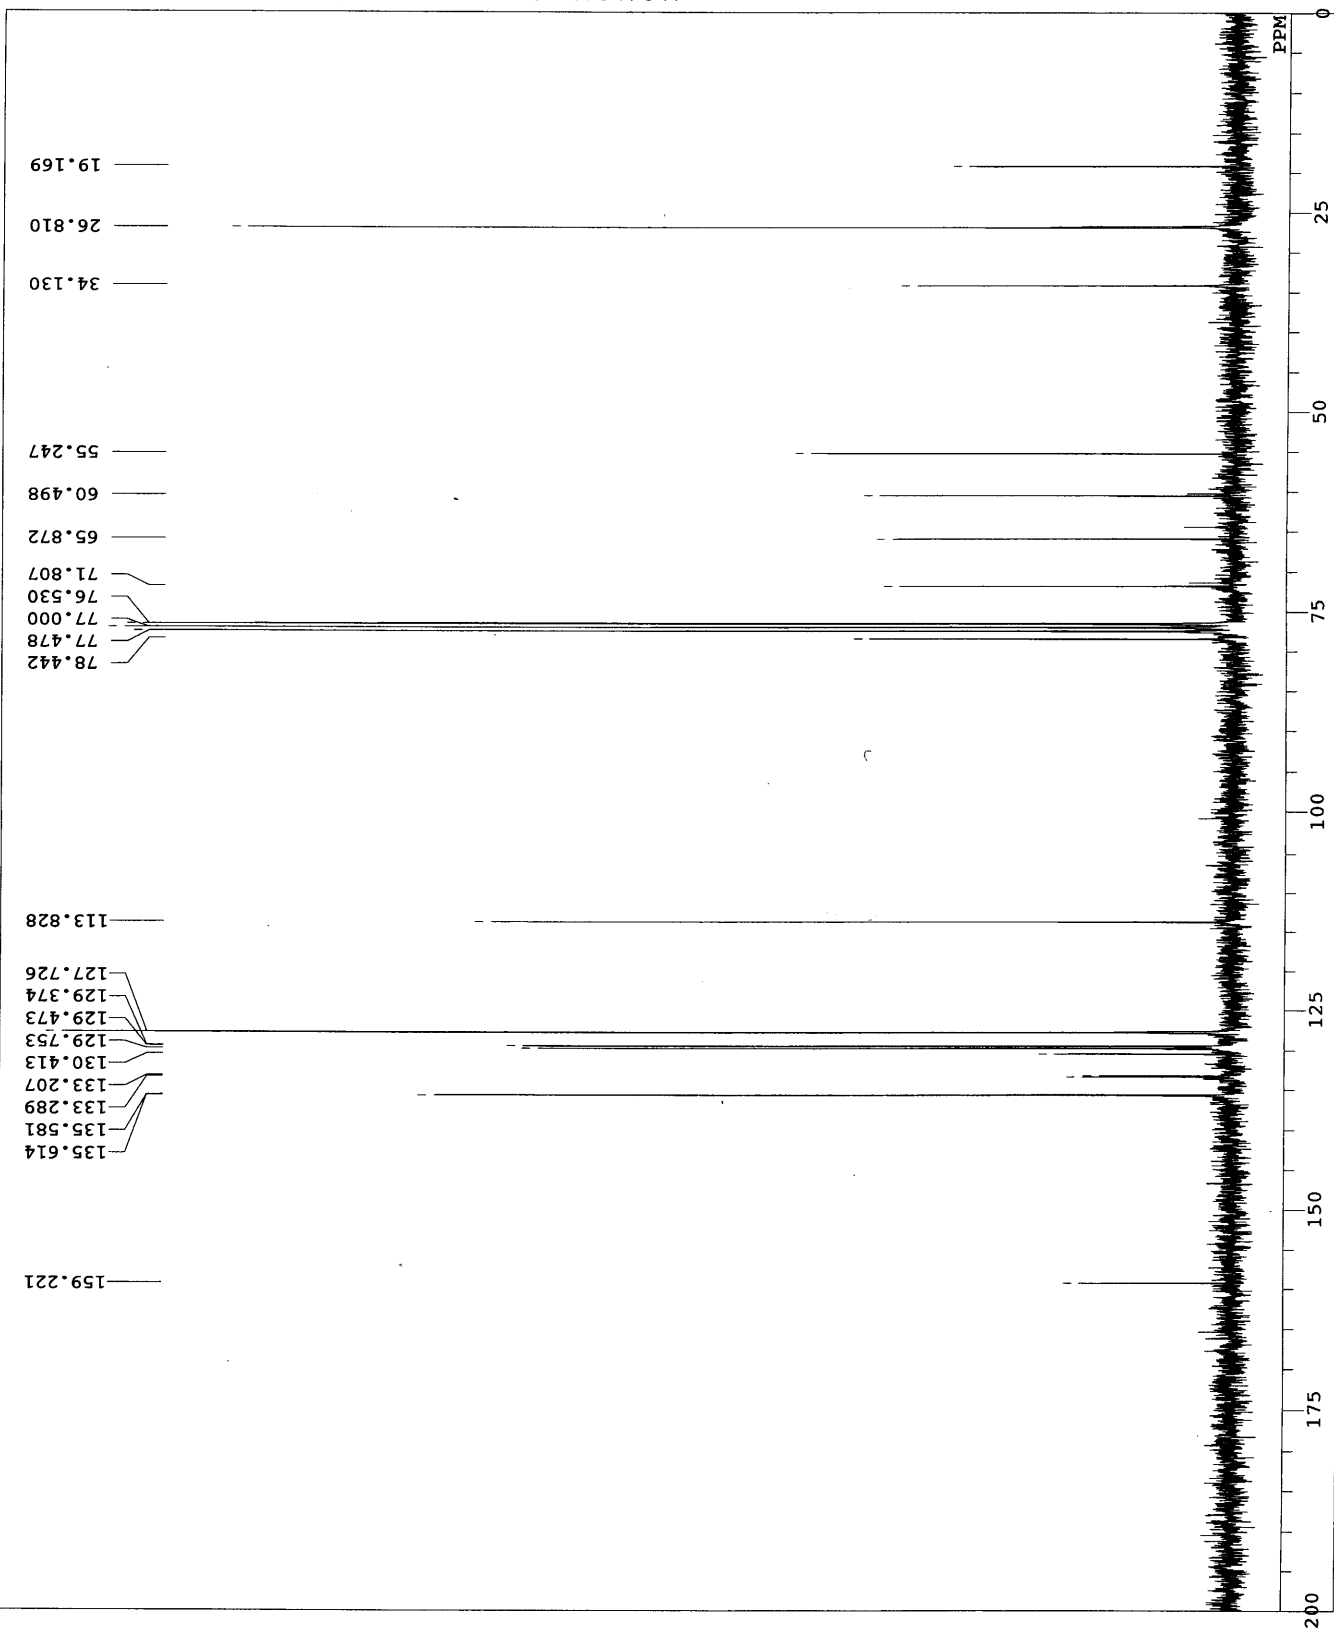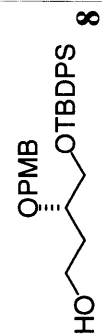

C:\WINNMR95\DATA\Auto1NON E1 FT.a.

Sat Aug 27 16:53:51 2005

|       |            |
|-------|------------|
| 1H    | 300.40 MHz |
| NON   | 130.00 KHz |
|       | 1150.0 Hz  |
|       | 32768      |
|       | 6020.4 Hz  |
|       | 32         |
|       | 5.443 sec  |
|       | 1.554 sec  |
|       | 5.4 us     |
| 1H    | 22.0 c     |
| CDCL3 | 7.26 ppm   |
|       | 0.12 Hz    |
|       | 22         |

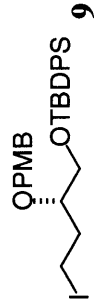

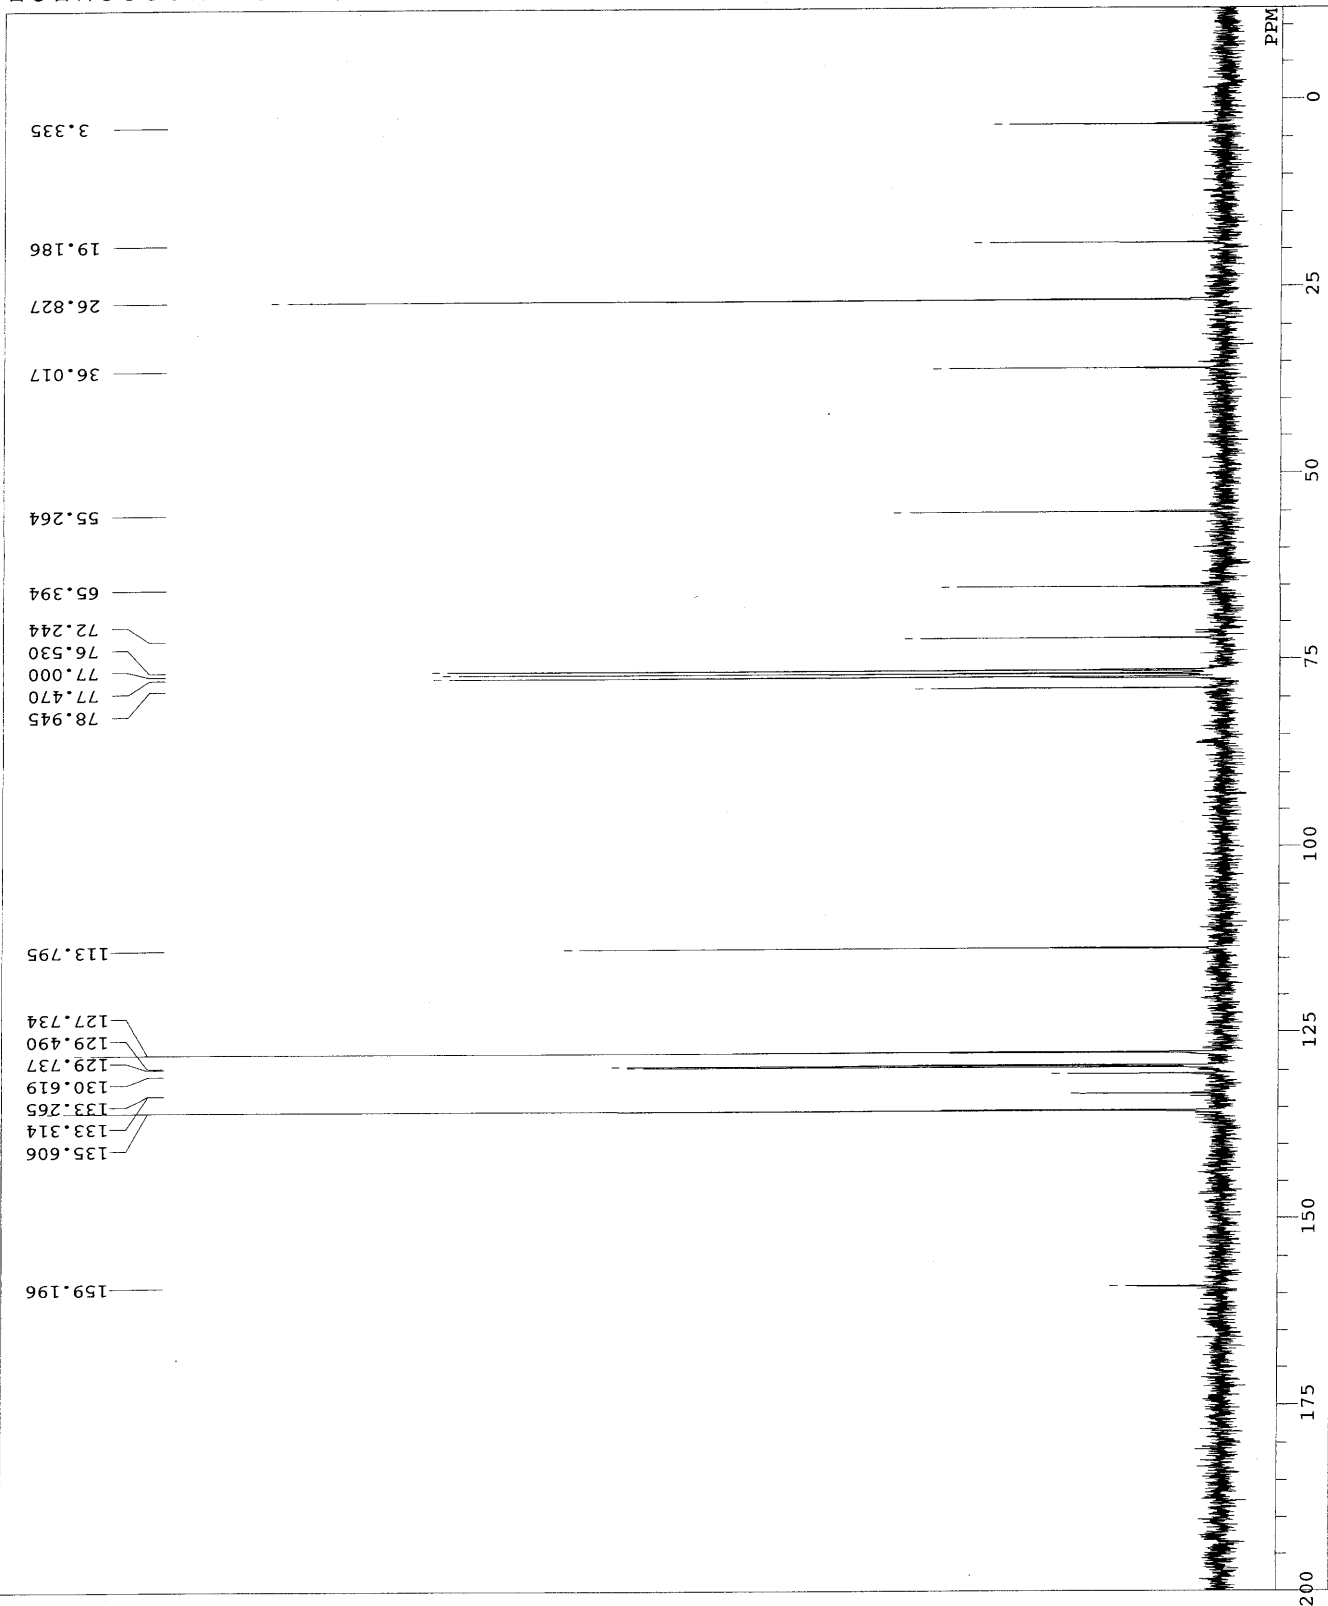

DFILE C:\WINNR98\TEMPDATA\Auto2BCM\_E1\_F  
COMNT Term-6  
DATIM Sun Sep 04 14:31:51 2005  
EXMOD BCM  
OBNUC 13C  
OBFRQ 67.80 MHz  
OBSET 135.00 KHz  
OBFIN 5200.0 Hz  
POINT 32768  
FREQU 18348.6 Hz  
CLPNT 1  
TODAT 1  
CLFRQ 500.0 Hz  
SCANS 512  
ACQTM 1.786 sec  
PD 1.211 sec  
PW1 3.8 us  
PW2 10.0 us  
PW3 10.0 us  
PI1 1.000 ms  
PI2 1.000 ms  
PI3 1.00 ms  
IRNUC 1H  
CTEMP 21.1 c  
SLVNT CDCL3  
EXREF 77.00 ppm  
CLEXR 0.00  
RGAIN 30  
OBATN 511  
LOOP1 1

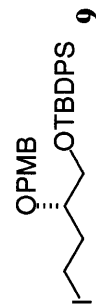

DFILE COMNT  
 DATIM Tue Sep 27 19:31:05 2005  
 EXMOD NON  
 OBNUC 1H  
 OBFRQ 270.05 MHz  
 OBSET 112.00 KHz  
 OBFIN 5800.0 Hz  
 POINT 32768  
 FREQU 5405.4 Hz  
 CLPNT 1  
 TODAT 1  
 CLFRQ 100.0 Hz  
 SCANS 64  
 ACQTM 6.062 sec  
 PD 0.935 sec  
 PW1 6.0 us  
 PW2 10.0 us  
 PW3 10.0 us  
 PI1 1.000 ms  
 PI2 1.000 ms  
 PI3 1.00 ms  
 IRNUC 1H  
 CTMP 24.0 C  
 SLVNT CDCL3  
 EXREF 7.26 ppm  
 CLEXR 0.00  
 RGAIN 18  
 OBATN 511  
 LOOP1 1

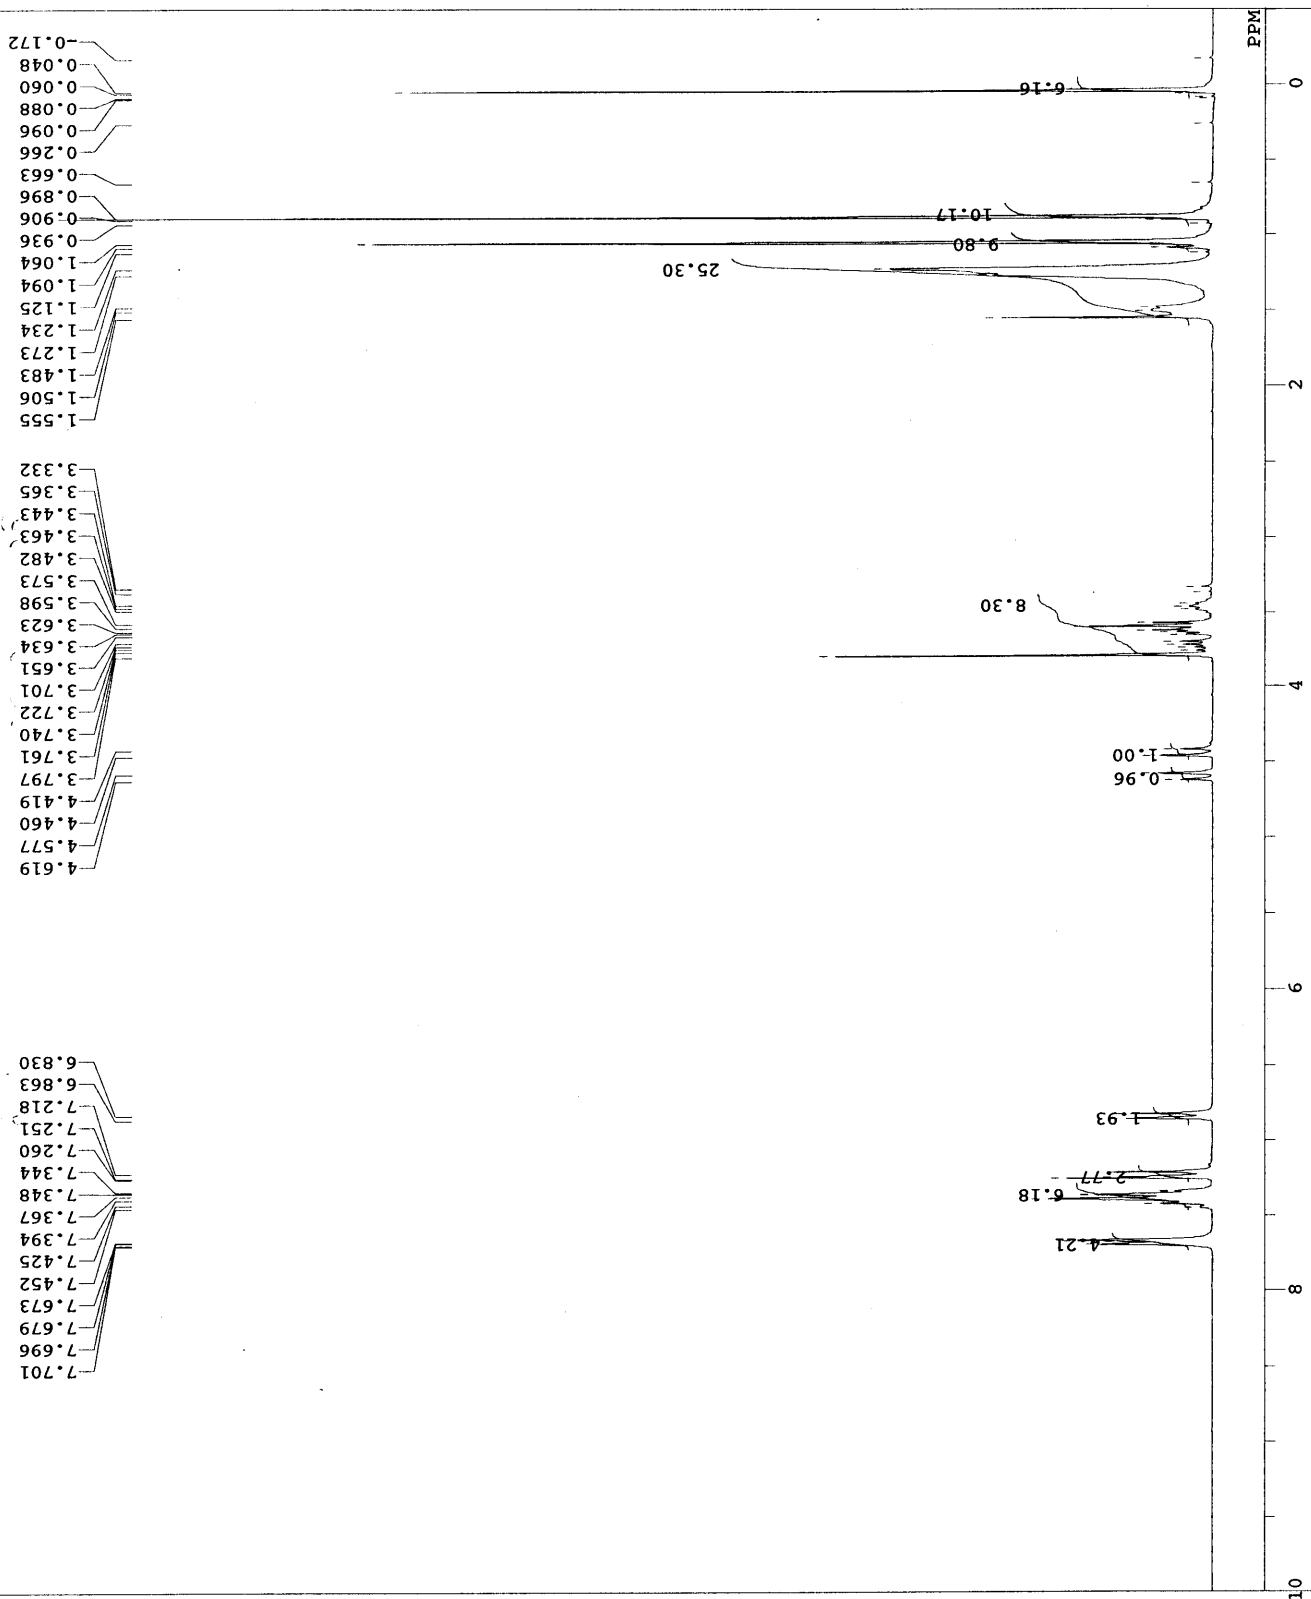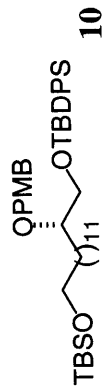



C:\WINNR98\TEMPDATA\Auto2BCM\_E1\_F  
Term  
Date Tue Sep 27 19:57:04 2005  
BCM  
EXMOD BCM  
OBNUC 13C

OBFRQ 67.80 MHz  
OBSET 135.00 KHz  
OBFIN 5200.0 Hz  
POINT 32768  
FREQU 18348.6 Hz  
CLPNT 1  
TODAT 1  
CLFRQ 500.0 Hz  
SCANS 512  
ACQTM 1.786 sec  
PD 1.211 sec  
PW1 3.8 us  
PW2 10.0 us  
PW3 10.0 us  
PI1 1.000 ms  
PI2 1.000 ms  
PI3 1.00 ms  
IRNUC 1H  
CTEMP 23.7 C  
SIVNT CDCL3  
EXREF 77.00 ppm  
CLEXR 0.00  
RGAIN 30  
OBATN 511  
LOOP1 1

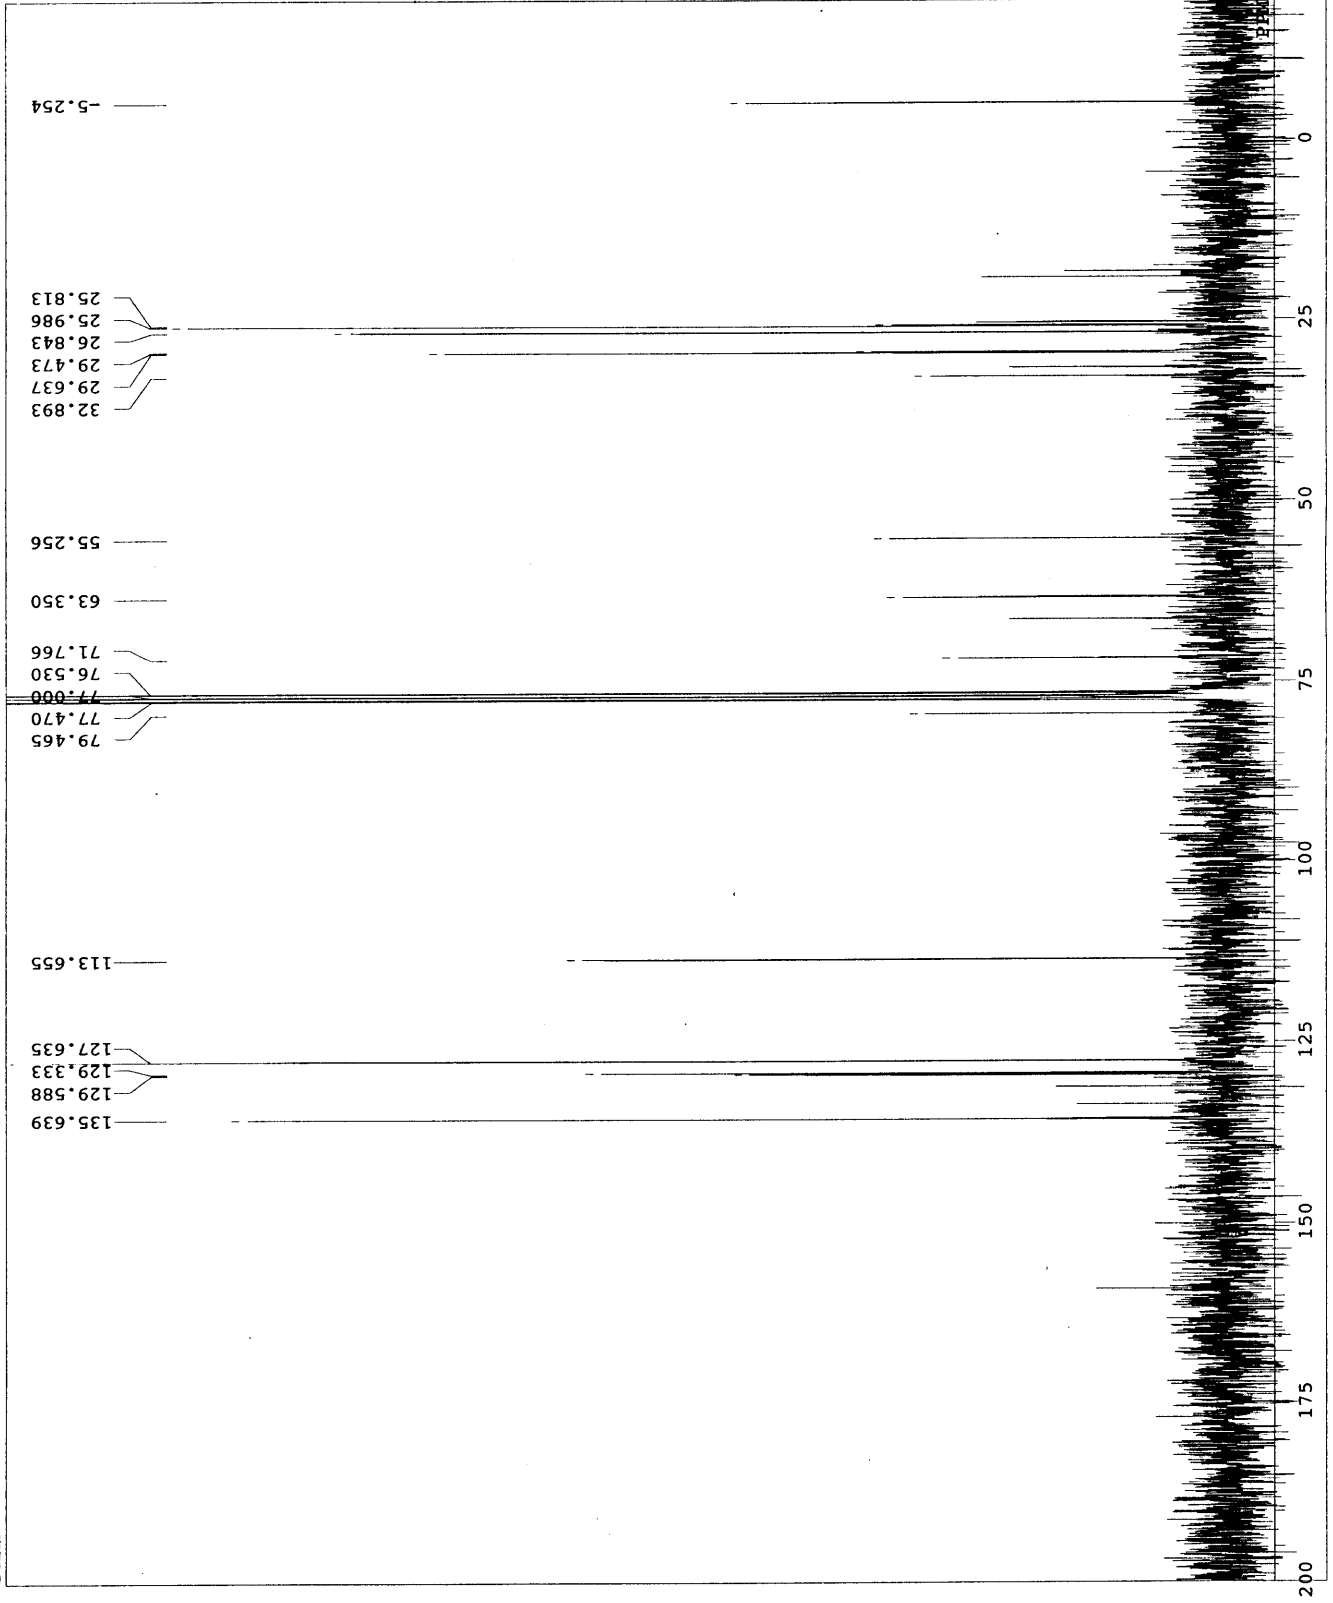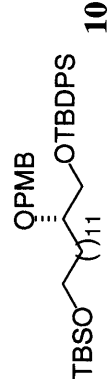

C:\winmr98\DATA\Auto1NON\_E1\_FT.al

Mon Nov 28 10:15:22 2005

# HT NON

|  |        |            |
|--|--------|------------|
|  | OBPQ   | 270.05 MHz |
|  | OBSSET | 112.00 KHz |
|  | OBFIN  | 5800.0 Hz  |
|  | POINT  | 32768      |
|  | FREQU  | 5405.4 Hz  |
|  | CPLNT  | 1          |
|  | TODAT  | 1          |
|  | CLFRQ  | 100.0 Hz   |
|  | SCANS  | 32         |
|  | ACQTM  | 6.062 sec  |
|  | PD     | 0.935 sec  |
|  | PW1    | 6.0 us     |
|  | PW2    | 10.0 us    |
|  | PW3    | 10.0 us    |
|  | P11    | 1.000 ms   |
|  | P12    | 1.000 ms   |
|  | P13    | 1.00 ms    |
|  | IRNUC  | 1H         |
|  | CTEMP  | 24.2 C     |
|  | SOLVT  | CDCl3      |
|  | EXREF  | 7.26 ppm   |
|  | CLEXR  | 0.00       |
|  | RGAIN  | 18         |
|  | OBATN  | 511        |
|  | LOOP1  | 1          |

OCC(COP(=O)([O-])C1=CC=C(C)C=C1)CCCCOC(=O)c1ccc(cc1)S(=O)(=O)c2ccccc2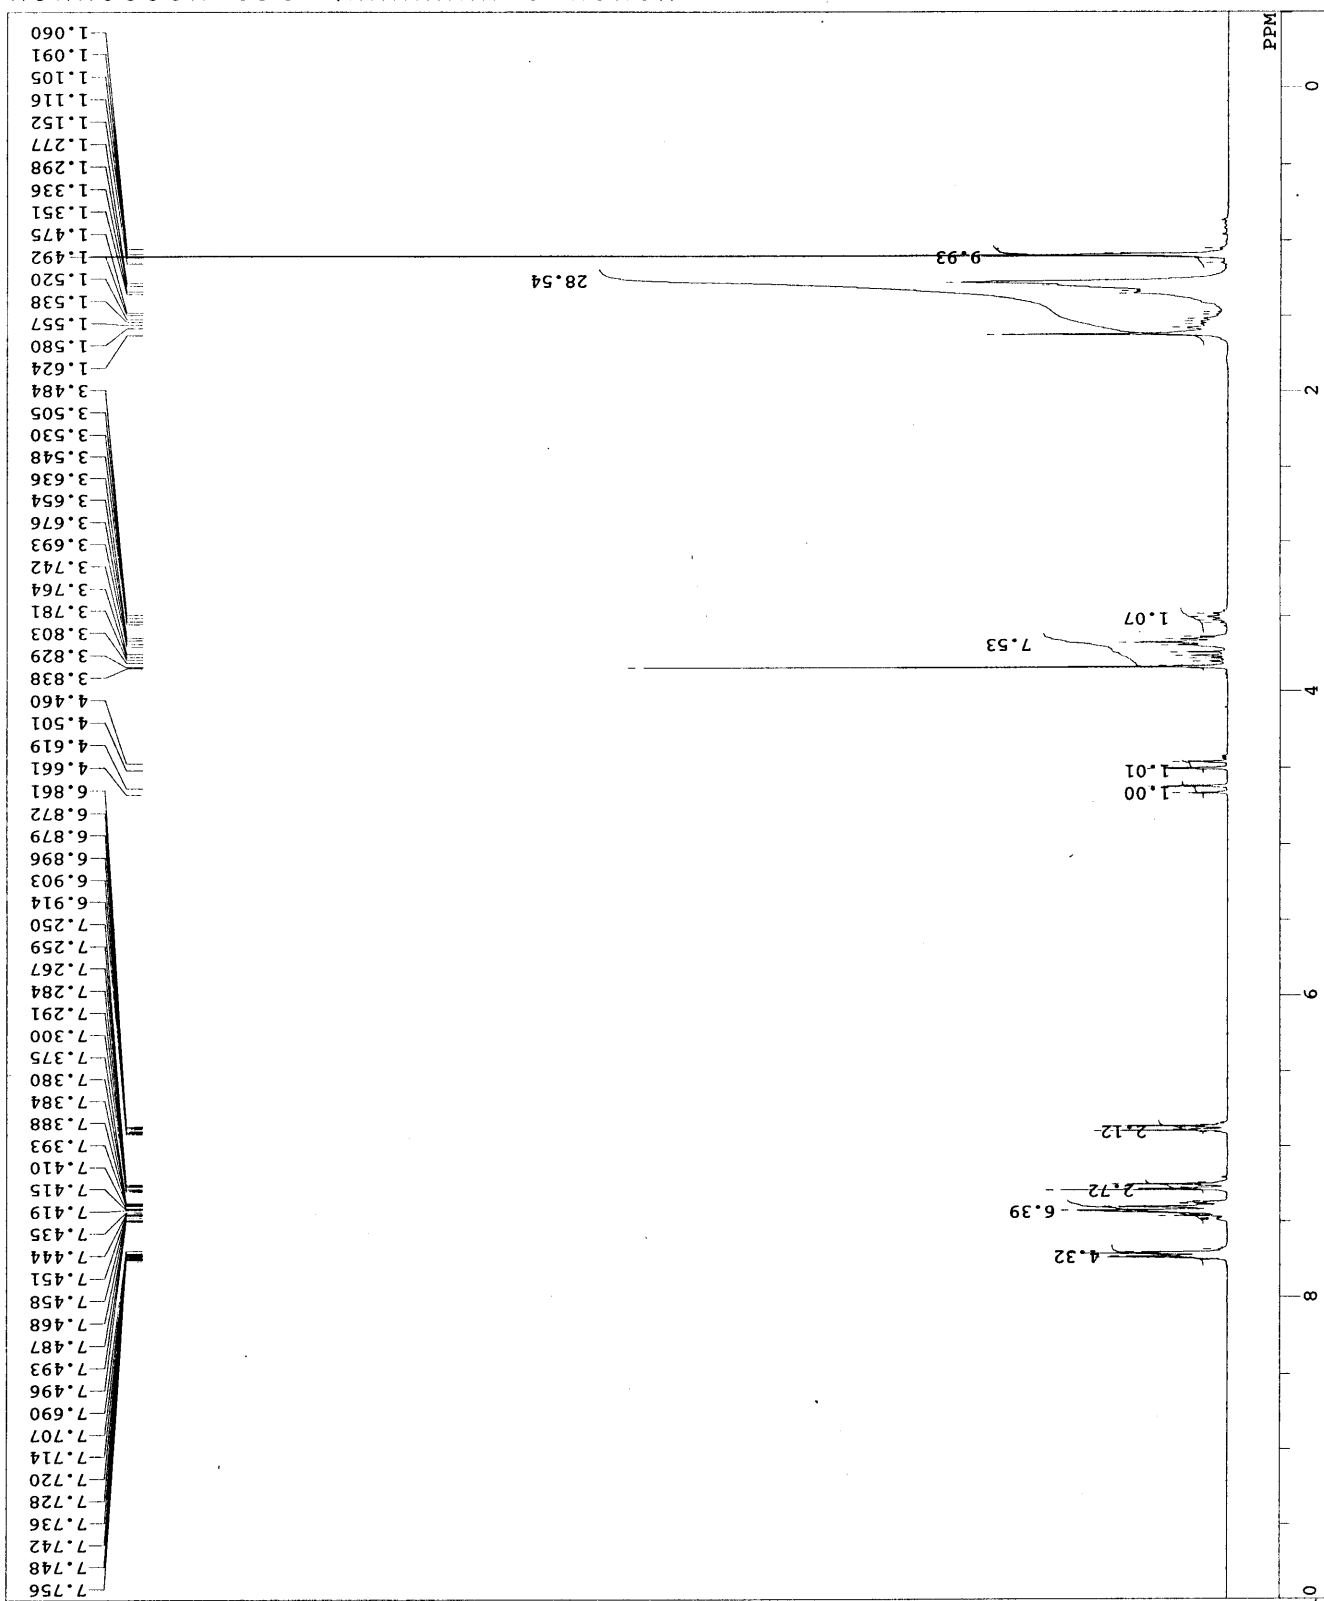

DFILE C:\WINNMR98\TEMPDATA\Auto2BCM\_EI\_FT\_ F  
CONNT Mon Nov 28 10:30:48 2005  
DATIM BCM  
EXMOD 13C  
OBNUC 13C

OBFREQ 67.80 MHz  
OBSET 135.00 KHz  
OBFIN 5200.0 Hz  
POINT 32768  
FREQU 18348.6 Hz  
CLPNT 1  
TODAT 1  
CLFRQ 500.0 Hz  
SCANS 300  
ACQTM 1.786 sec  
PD 1.211 sec  
PW1 3.8 us  
PW2 10.0 us  
PW3 10.0 us  
PI1 1.000 ms  
PI2 1.000 ms  
PI3 1.00 ms  
IRNUC 1H  
CTEMP 23.5 C  
SLVNT CDCL3  
EXREF 77.00 ppm  
CLEXR 0.00  
RGAIN 31  
OBATN 511  
LOOP1 1

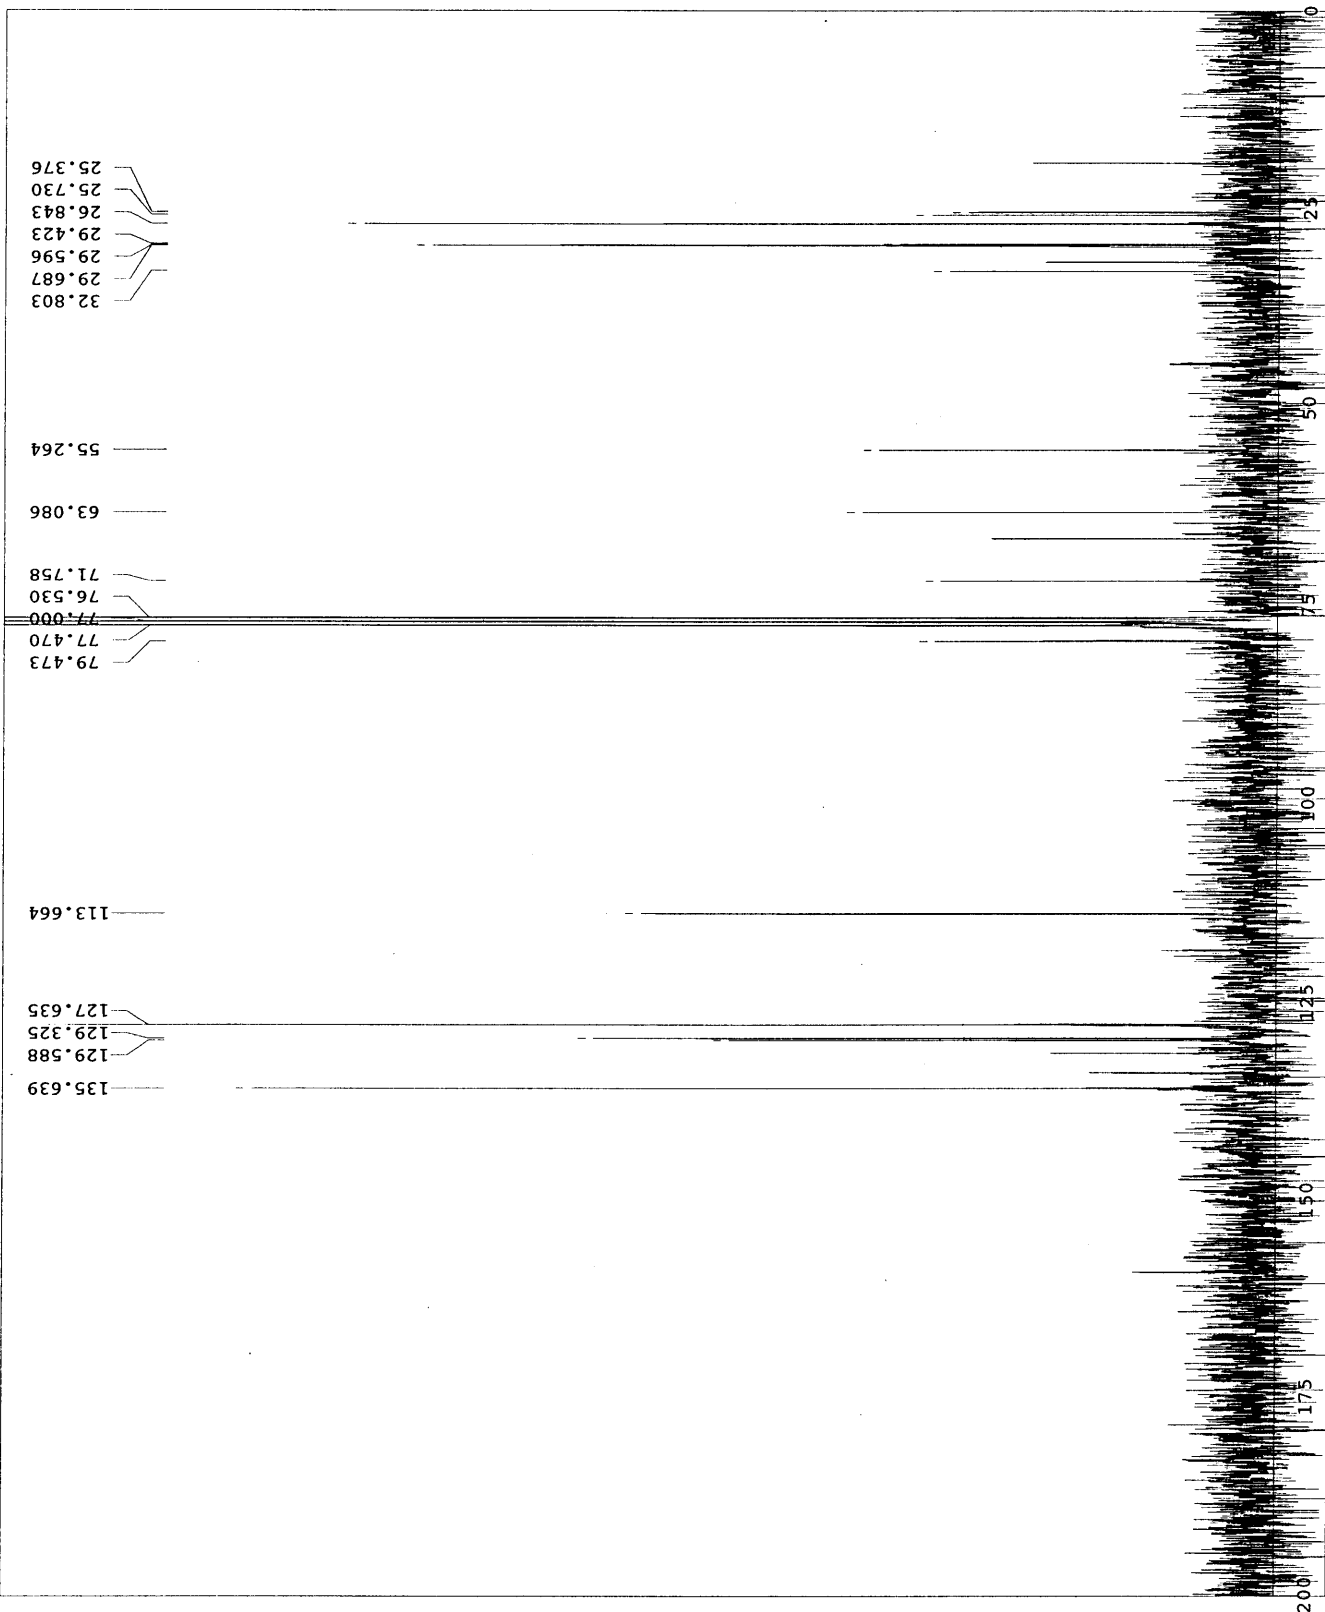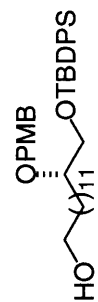

Sun Dec 25 14:34:37 2005

|       |       |       |       |       |       |       |       |       |       |       |       |       |       |       |    |     |     |     |     |     |     |       |       |       |       |       |       |       |       |
|-------|-------|-------|-------|-------|-------|-------|-------|-------|-------|-------|-------|-------|-------|-------|----|-----|-----|-----|-----|-----|-----|-------|-------|-------|-------|-------|-------|-------|-------|
| DFILE | COMMT | DATIM | EXMOD | OBNUC | OBFRQ | OBSET | OBFIN | POINT | FREQU | CLPNT | TODAT | CLFRQ | SCANS | ACQTM | PD | PW1 | PW2 | PW3 | PI1 | PI2 | PI3 | IRNUC | CTEMP | SLVNT | EXREF | CLEXR | RGAIN | OBATN | LOOP1 |
|-------|-------|-------|-------|-------|-------|-------|-------|-------|-------|-------|-------|-------|-------|-------|----|-----|-----|-----|-----|-----|-----|-------|-------|-------|-------|-------|-------|-------|-------|

4.628  
-4.586  
-4.464  
-3.820  
-3.764  
-3.742  
-3.703  
-3.654  
-3.615  
-3.598  
-3.493  
-3.468  
-3.447  
-3.216  
-3.190  
-2.052  
-1.875  
-1.849  
-1.823  
-1.796  
-1.770  
-1.577  
-1.499  
-1.481  
-1.356  
-1.238  
-1.114  
-1.067  
-0.833

7.712  
7.706  
7.700  
7.684  
7.678  
7.671  
7.459  
7.433  
7.410  
7.400  
7.376  
7.353  
7.349  
7.260  
7.257  
7.225  
6.878  
6.868  
6.860  
6.844  
6.836

|        |            |
|--------|------------|
| OBFRQ  | 270.05 MHz |
| OBSSET | 112.00 KHz |
| OBFIN  | 5800.0 Hz  |
| POINT  | 32768      |
| FREQU  | 5405.4 Hz  |
| CLPNT  | 1          |
| TODAT  | 1          |
| CLFRQ  | 100.0 Hz   |
| SCANS  | 128        |
| ACQTM  | 6.062 sec  |
| PD     | 0.935 sec  |
| PW1    | 6.0 us     |
| PW2    | 10.0 us    |
| PW3    | 10.0 us    |
| P11    | 1.000 ms   |
| P12    | 1.000 ms   |
| P13    | 1.00 ms    |
| IRNUC  | 1H         |
| CTEMP  | 18.9 C     |
| SLVNT  | CDCL3      |
| EXREF  | 7.26 ppm   |
| CLEXR  | 0.00       |
| RGAIN  | 17         |
| OBATN  | 511        |
| LOOP1  | 1          |

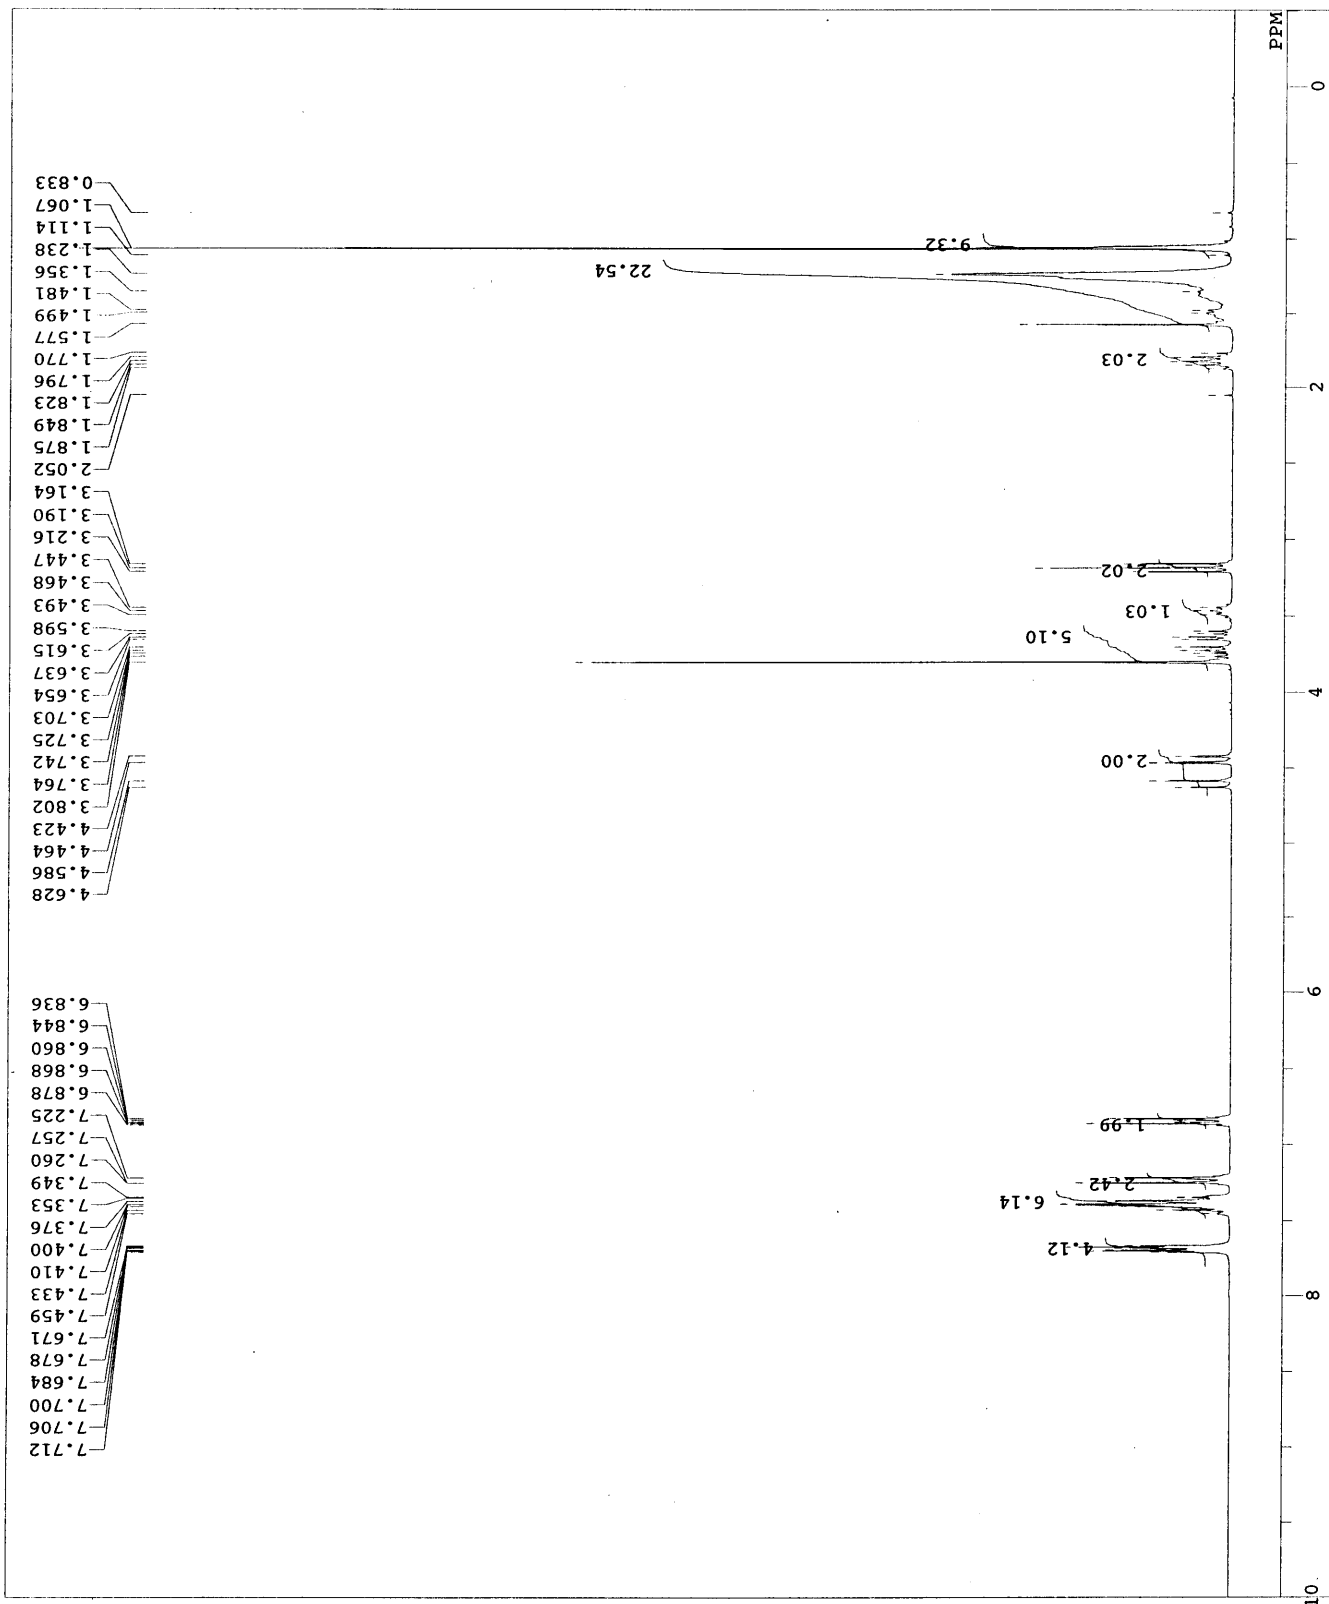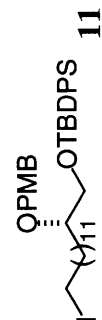

DFILE COMNT  
COMNT  
DATIM Sun Dec 25 14:55:04 2005  
EXMOD BCM  
EXMOD BCM  
OBNUC 13C  
OBFREQ 67.80 MHz  
OBSET 135.00 KHz  
OBFIN 5200.0 Hz  
POINT 32768  
FREQ 18348.6 Hz  
CLPNT 1  
TODAT 1  
CLFRQ 500.0 Hz  
SCANS 400  
ACQTM 1.786 sec  
PD 1.211 sec  
PW1 3.8 us  
PW2 10.0 us  
PW3 10.0 us  
PI1 1.000 ms  
PI2 1.000 ms  
PI3 1.000 ms  
IRNUC 1H  
CTEMP 19.6 c  
SLVNT CDCL3  
EXREF 77.00 ppm  
CLEXR 0.00  
RGAIN 30  
OBATN 511  
LOOP1 1

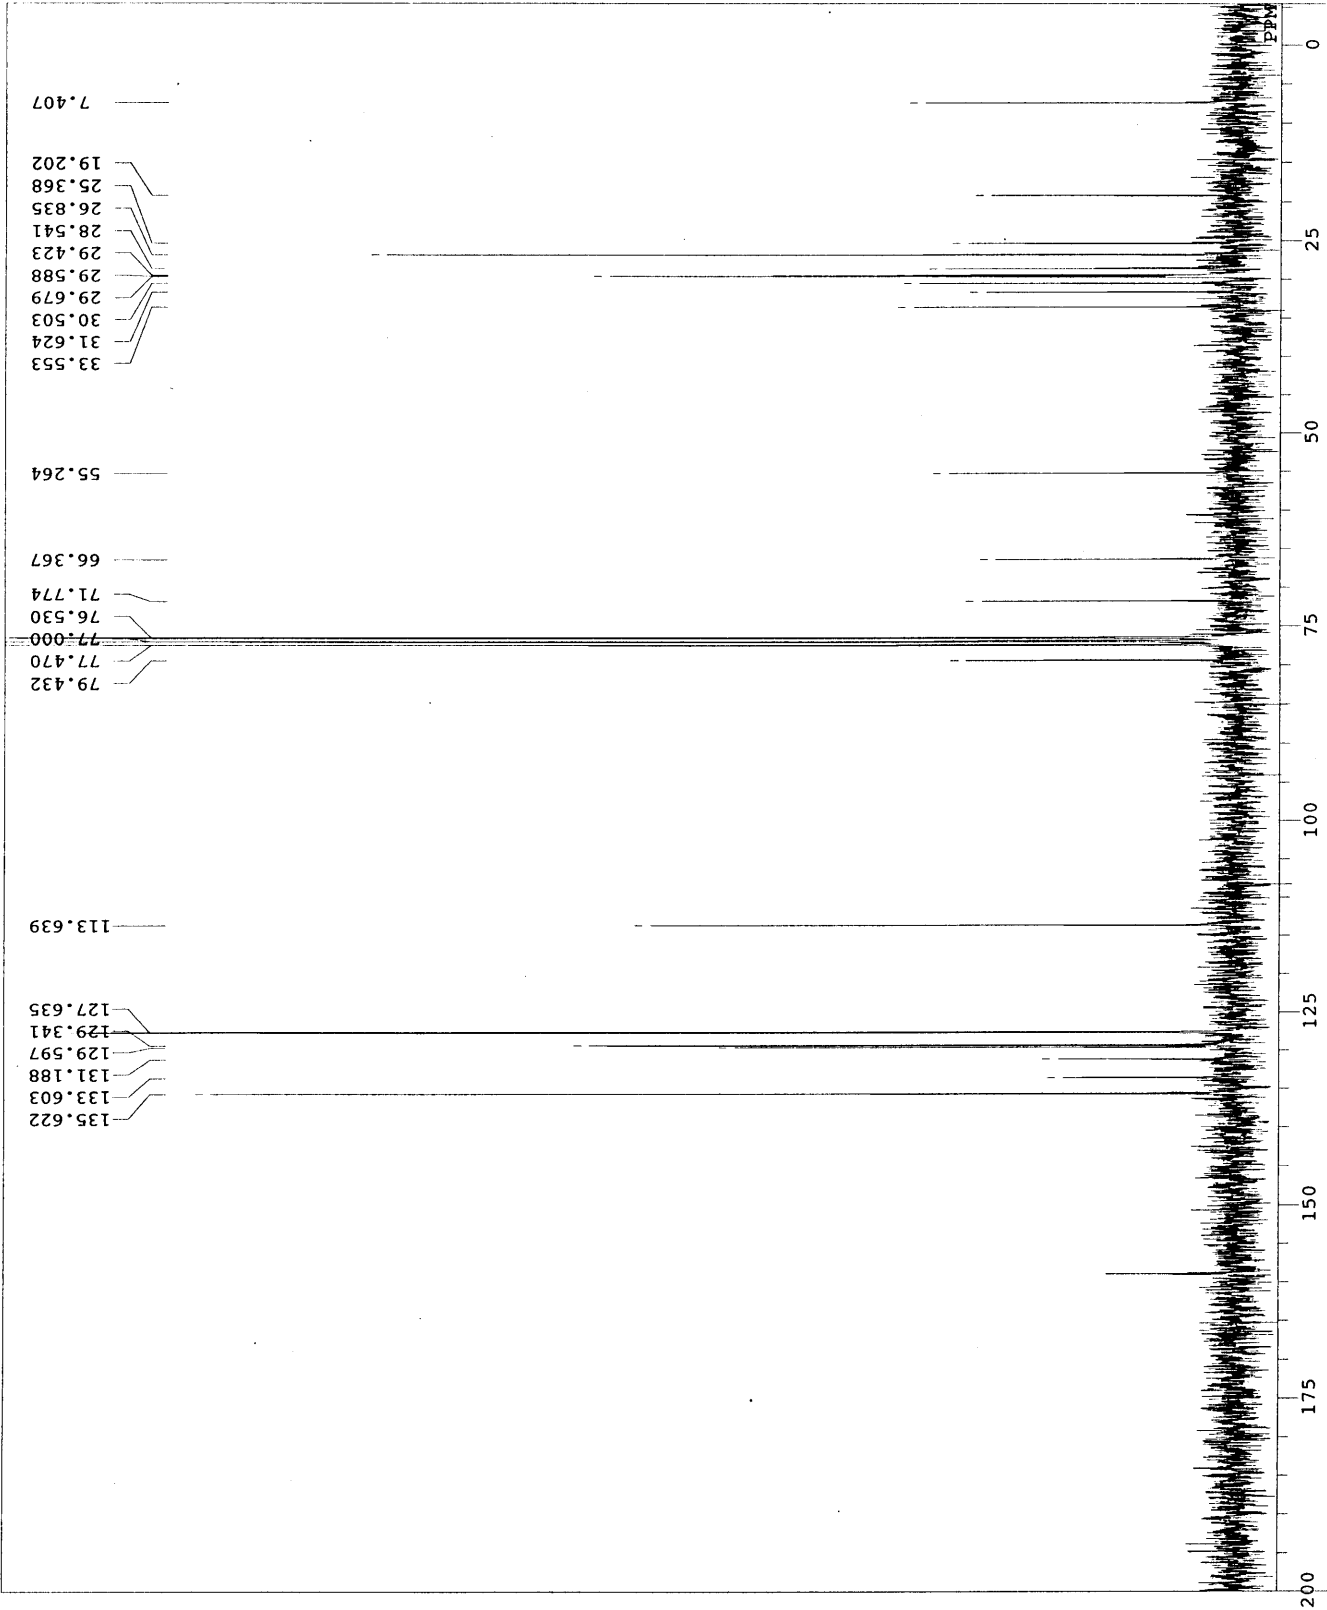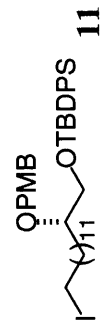





C:\WINNMR95\DATA\Auto1NON\_E1\_FT.als  
03.02.24 No.113  
Wed Feb 25 14:23:46 2004

DFILE COMNT DATIM OBNUC EXMOD OBFRQ OBSET OBFIN POINT FREQU SCANS ACQTM PD PW1 IRNUC CTEMP SLVNT EXREF BF RGAIN

0.000  
-0.072

1.973  
1.583  
1.489  
1.467  
1.182  
0.990  
0.976  
0.809

Figure 1 is a line graph showing the variation of the ratio of the maximum value of the function to the value of the function at the point of maximum value, plotted against the parameter  $\alpha$ . The x-axis is labeled  $\alpha$  and ranges from 0 to 1. The y-axis is labeled with values from 7.623 to 7.755. The graph shows a series of curves that generally increase as  $\alpha$  increases, with some curves showing a sharp increase near  $\alpha = 1$ .

|            |  |
|------------|--|
| 300.40 MHz |  |
| 130.00 KHz |  |
| 1150.0 Hz  |  |
| 32768      |  |
| 6020.4 Hz  |  |
| 32         |  |
| 5.443 sec  |  |
| 1.554 sec  |  |
| 5.5 us     |  |
| 1H         |  |
| 21.3 c     |  |
| CDCL3      |  |
| 0.00 ppm   |  |
| 0.12 Hz    |  |
| 14         |  |

HOCH2CH2C(O)C(COP(=O)(O)C1=CC=C(C=C1)C=C2C=CC(=C2)C=C1)COP(=O)(O)C3=CC=C(C=C1)C=C2C=CC(=C2)C=C1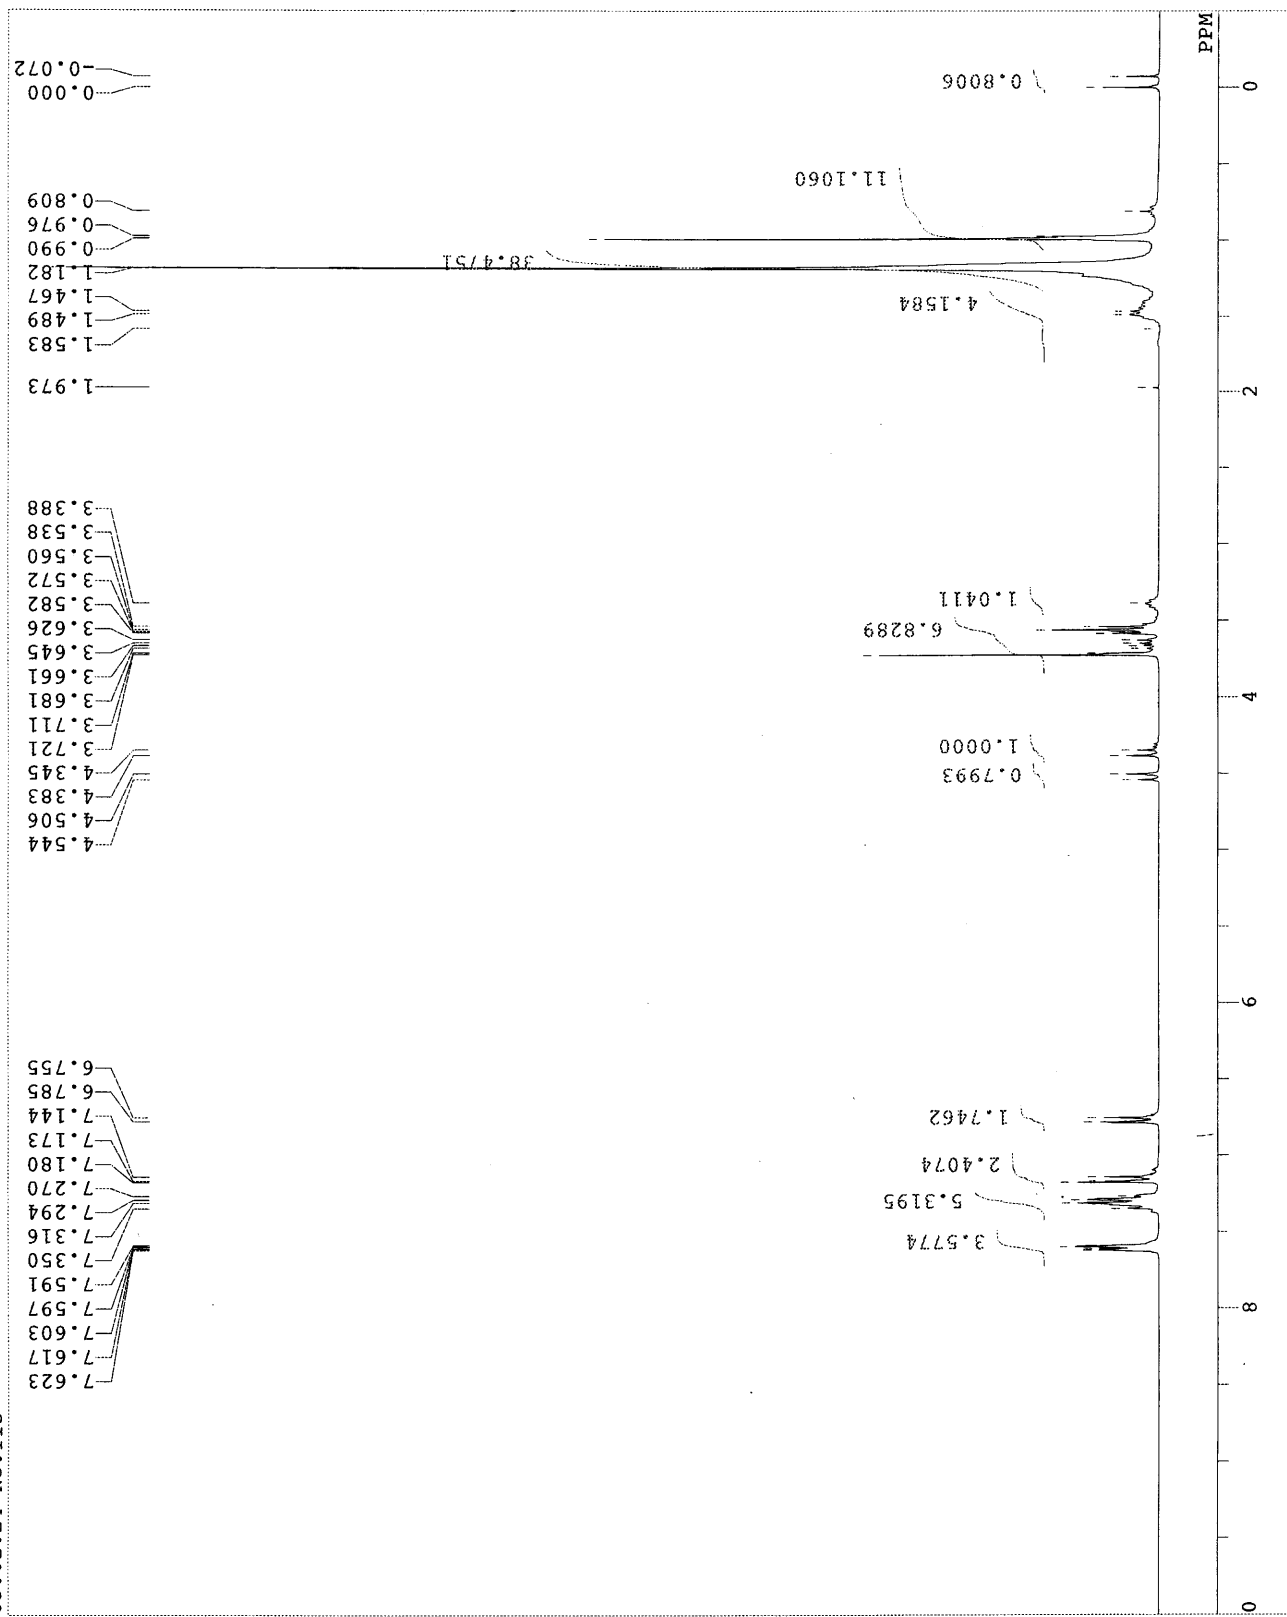



DFILE C:\WINMR95\TEMPDATA\AUTO2BCM\_E1\_FT  
COMNT 03.02.24 No.113  
DATIM Wed Feb 25 14:49:52 2004  
OBNUC 13C  
EXMOD BCM

OBFRQ 75.45 MHz  
OBSET 124.00 KHz  
OBFIN 1840.0 Hz  
POINT 32768  
FREQU 20408.1 Hz  
SCANS 512  
ACQTM 1.606 sec  
PD 1.394 sec  
PWL 4.2 us  
IRNUC 1H  
CTEMP 21.0 c  
SLVNT CDCL3  
EXREF 77.00 ppm  
BF 1.20 Hz  
RGAIN 25

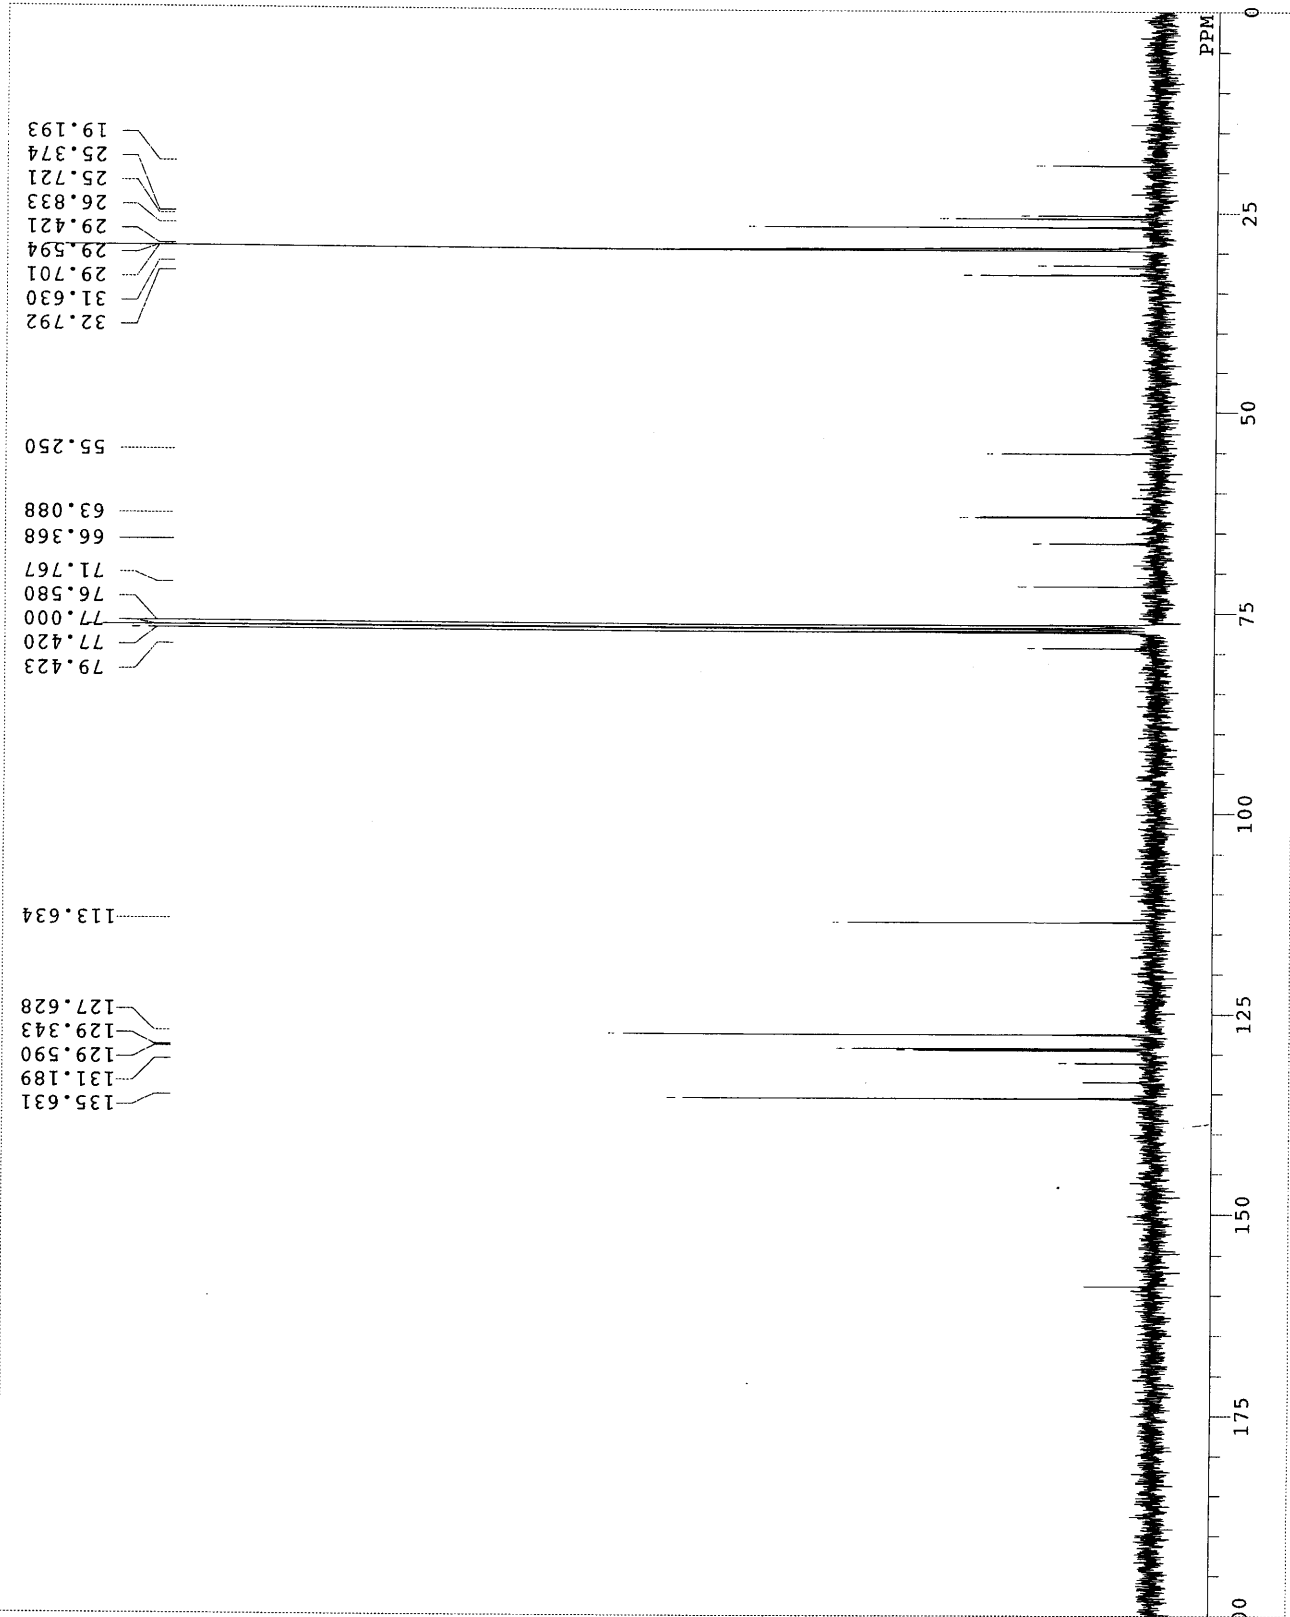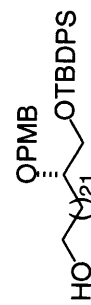

C:\WINMR98\DATA\Auto1NON\_E1\_FT.als  
04.04.02

DFILE  
COMMT  
DATIM  
OBNUC  
EXMOD  
OBFRQ  
OBSET  
OBFIN  
POINT  
FREQU  
SCANS  
ACQTM  
PD  
PW1  
IRNUC  
CTEMP  
SLVNT  
EXREF  
BF  
RGAIN

C:\WINMR98\DATA\Auto1NON\_E1\_FT.a  
04.04.02  
Fri Apr 02 18:32:54 2004  
1H  
NON  
270.05 MHz  
112.00 KHz  
5800.0 Hz  
32768  
5405.4 Hz  
64  
6.062 sec  
0.935 sec  
5.5 us  
1H  
20.9 C  
CDCL3  
7.24 ppm  
0.12 Hz  
19

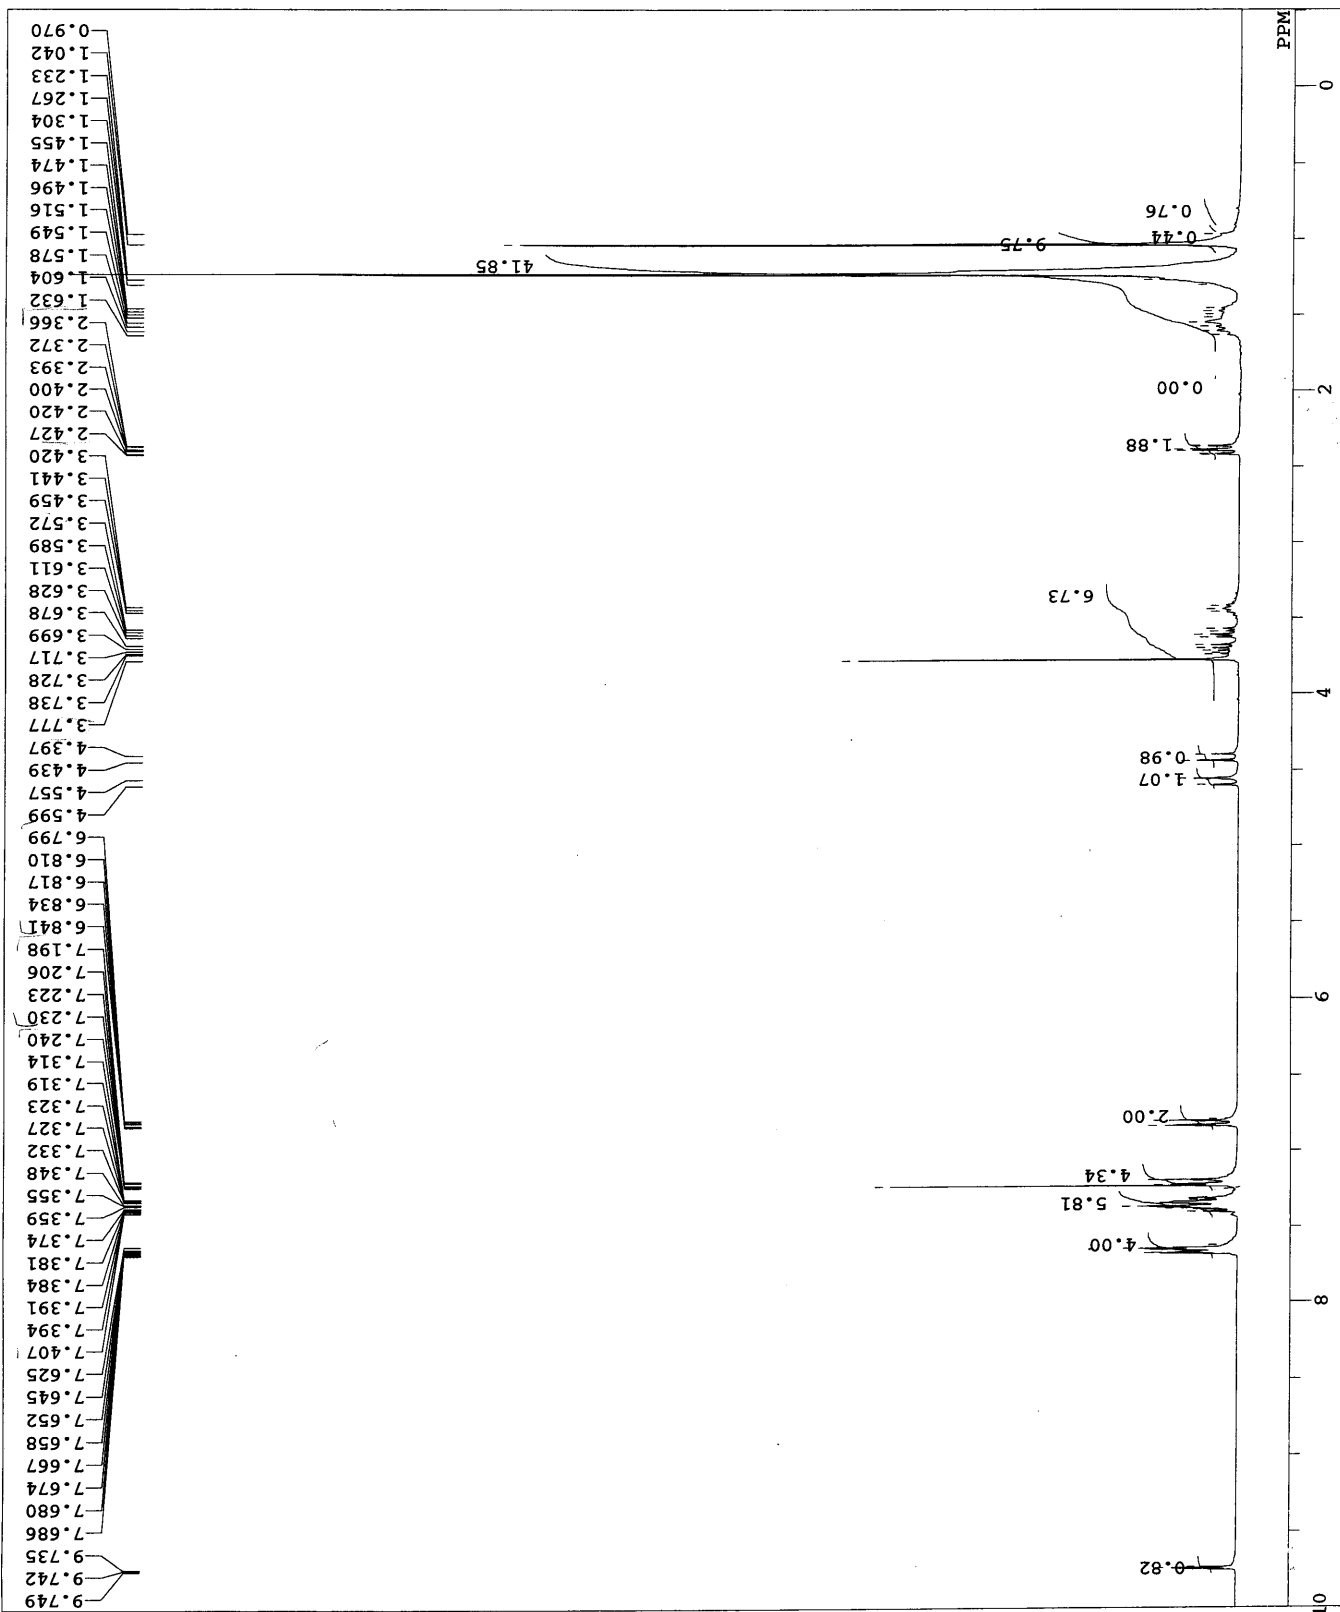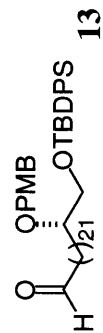

-CHO

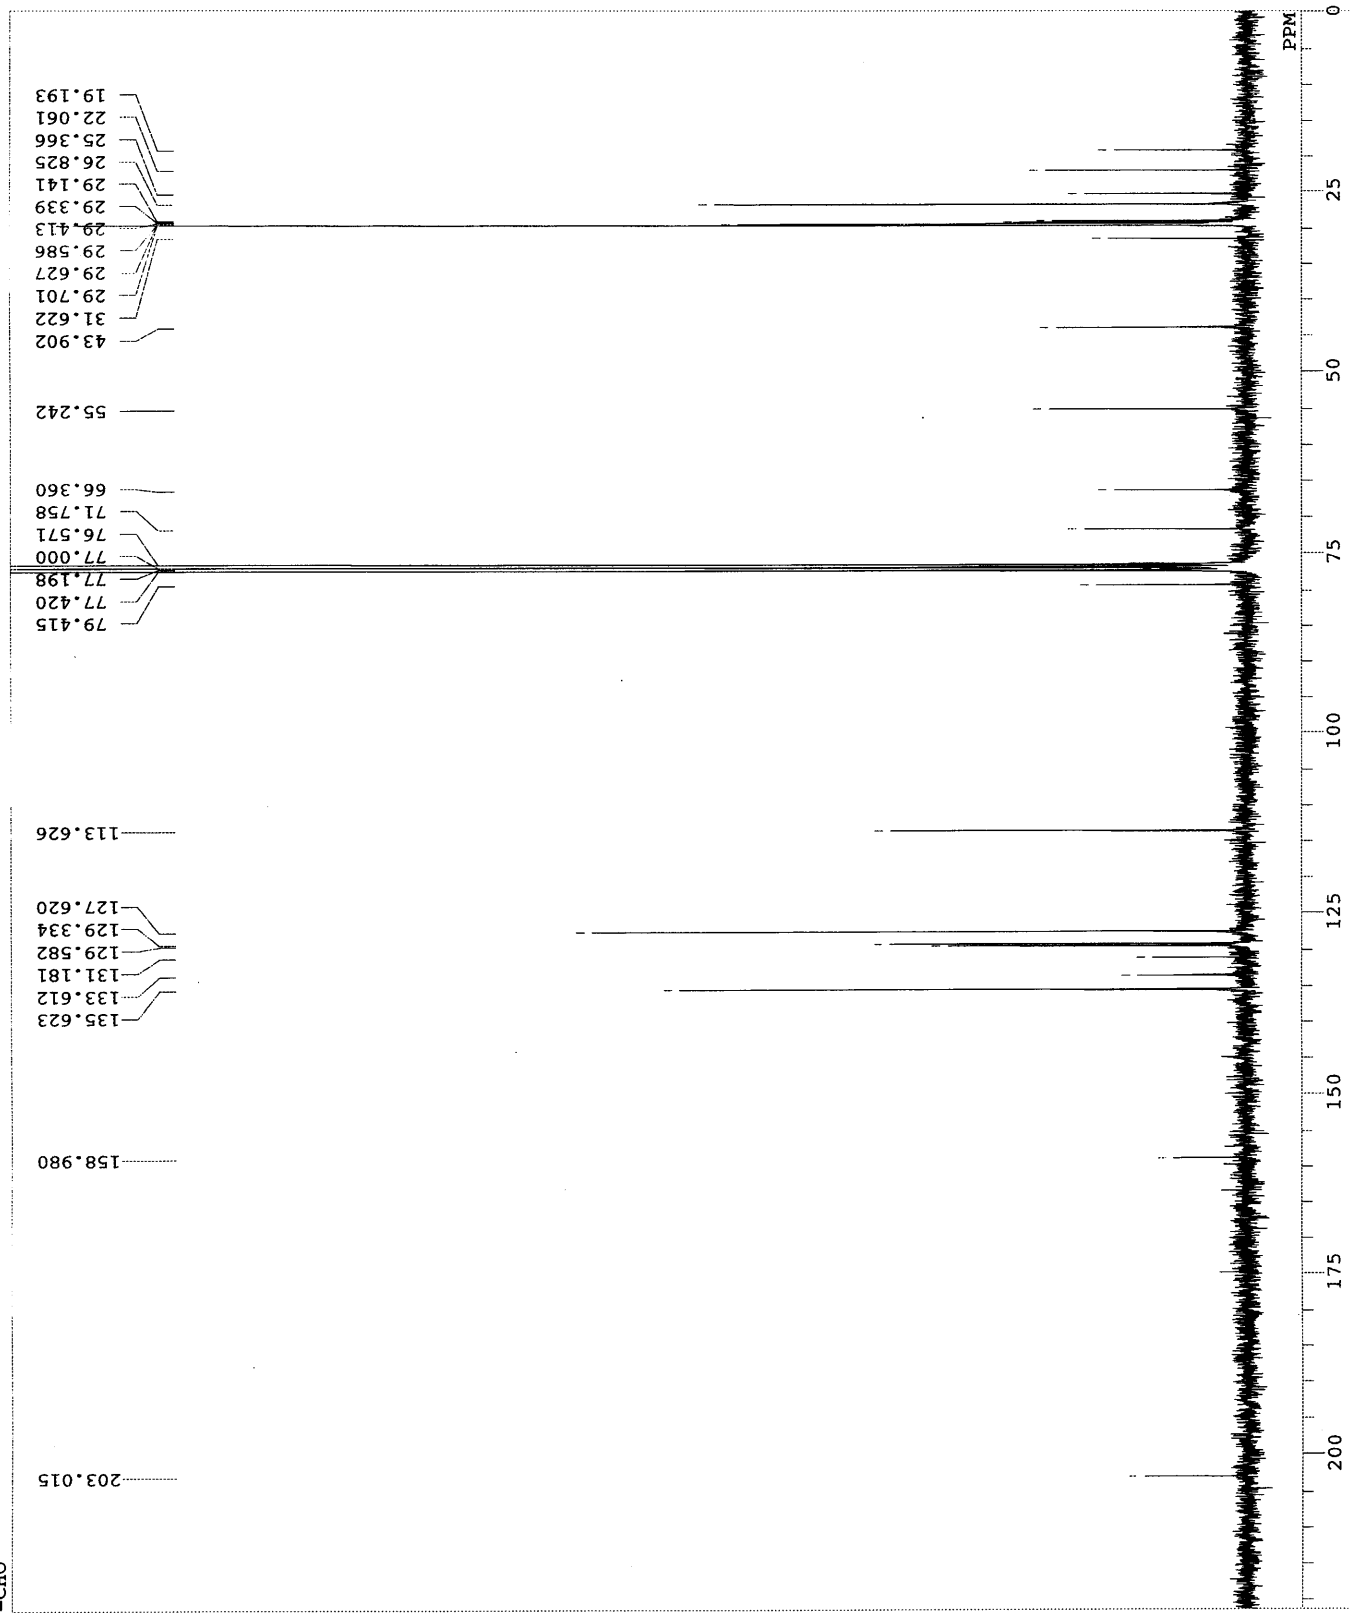

DFILE -CHO  
CONNT Sat Feb 11 13:18:22 2006  
DATIM 13C  
OBNUC BCM  
EXMOD BCM  
OBFRO 75.45 MHz  
OBSET 124.00 KHz  
OBFIN 1840.0 Hz  
POINT 32768  
FREQU 20408.1 Hz  
SCANS 960  
ACQTM 1.606 sec  
PD 1.394 sec  
PWI 4.1 us  
IRNUC 1H  
CTEMP 20.5 c  
SLVNT CDCL3  
EXREF 77.00 ppm  
BF 1.20 Hz  
RGAIN 22

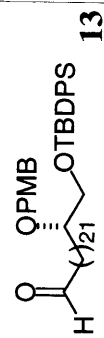

C:\winmr98\DATA\Auto1NON E1 FT.al

Sun Dec 11 17:22:22 2005  
NON  
1H

|       |            |  |
|-------|------------|--|
| OBRFQ | 270.05 MHz |  |
| OBSBT | 112.00 KHz |  |
| OBRIN | 5800.0 Hz  |  |
| POINT | 32768      |  |
| FREQU | 5405.4 Hz  |  |
| CLPNT | 1          |  |
| TODAT | 1          |  |
| CLFRQ | 100.0 Hz   |  |
| SCANS | 128        |  |
| ACQTM | 6.062 sec  |  |
| PPD   | 0.935 sec  |  |
| PW1   | 6.0 us     |  |
| PW2   | 10.0 us    |  |
| PW3   | 10.0 us    |  |
| PI1   | 1.000 ms   |  |
| PI2   | 1.000 ms   |  |
| PI3   | 1.00 ms    |  |
| IRNUC | 1H         |  |
| CTEMP | 22.6 C     |  |
| SLVNT | CDCL3      |  |
| EXREF | 7.26 ppm   |  |
| CLEXR | 0.00       |  |
| RGAIN | 11         |  |
| OBATN | 511        |  |
| LOOP1 | 1          |  |

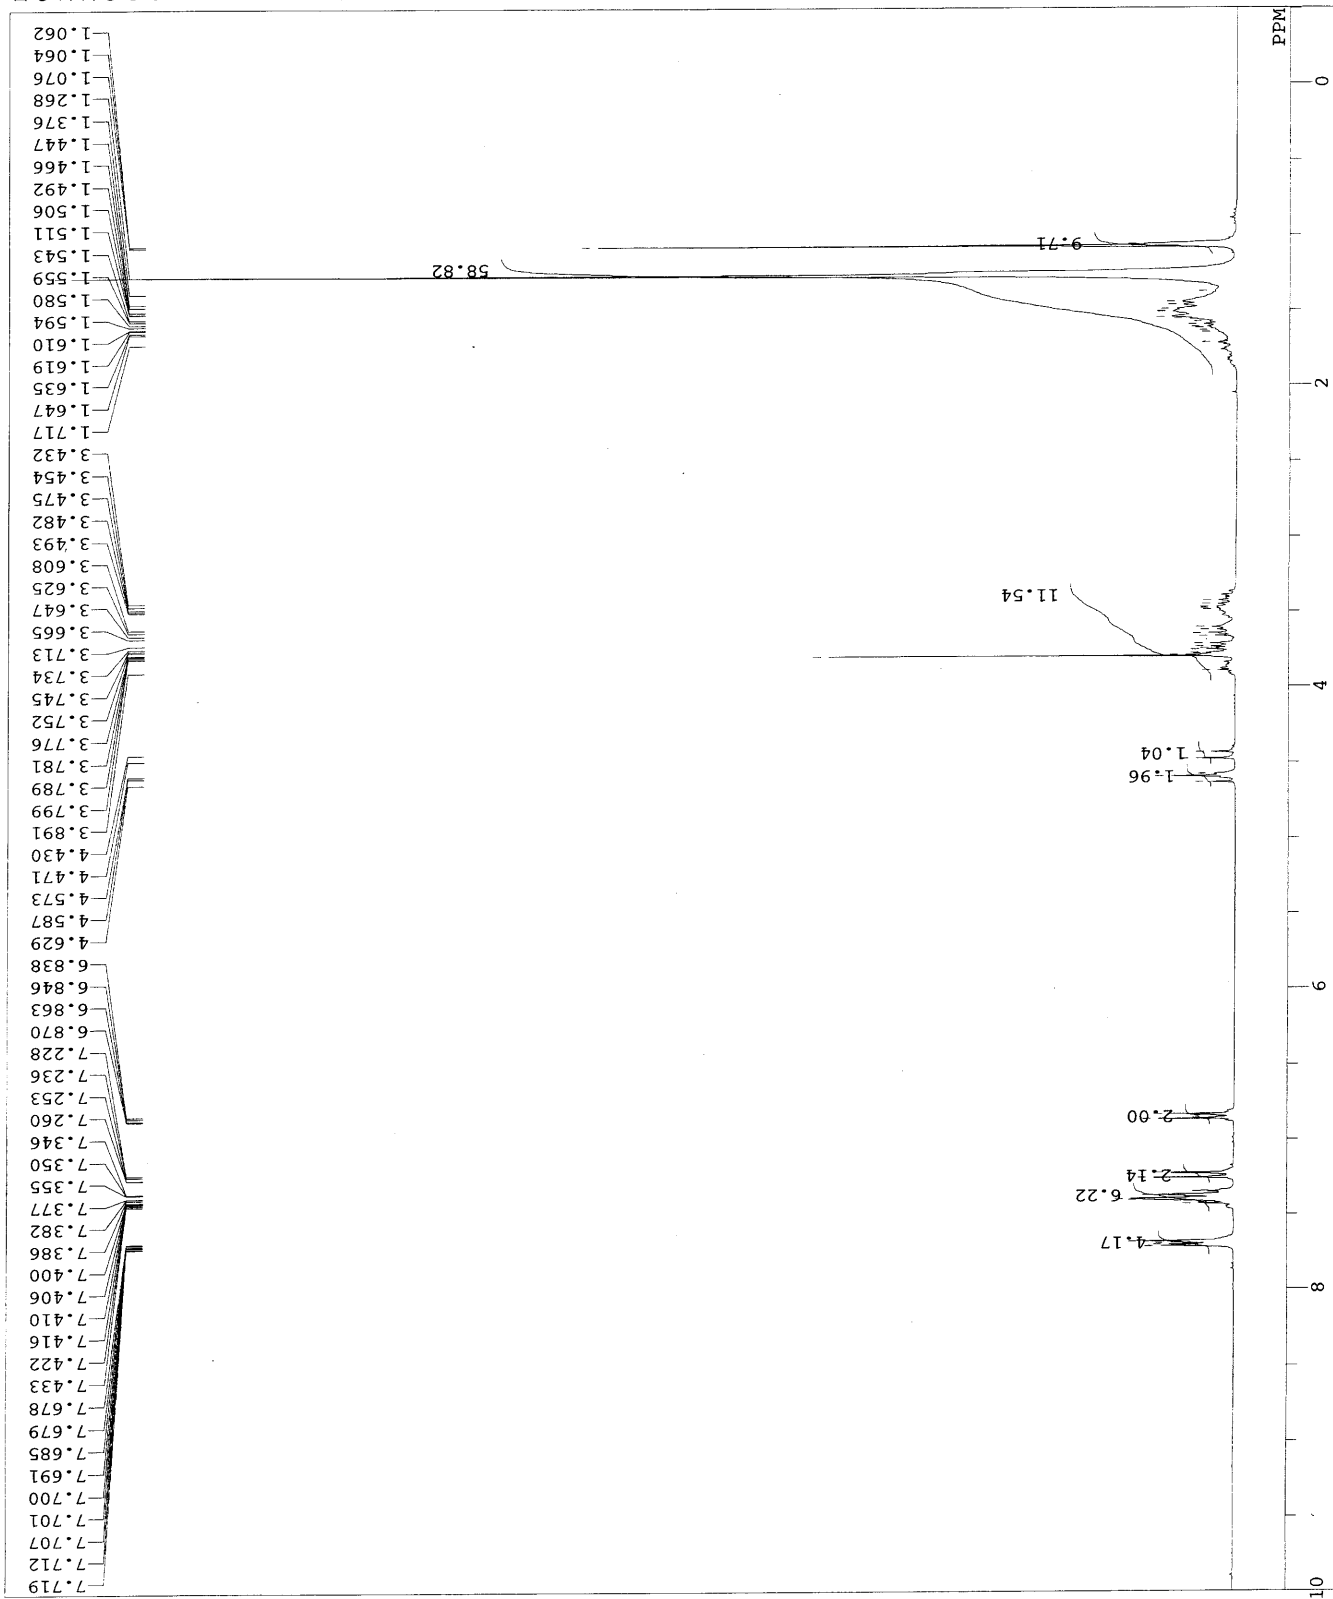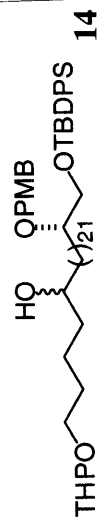

DFILE COMNT  
DATIM  
EXMOD BCM  
OBNUC 13C  
OBFRQ 67.80 MHz  
OBSET 135.00 KHz  
OBFIN 5200.0 Hz  
POINT 32768  
FREQU 18348.6 Hz  
CLPNT 1  
TODAT 1  
CLFRQ 500.0 Hz  
SCANS 300  
ACQTM 1.786 sec  
PD 1.211 sec  
PW1 3.8 us  
PW2 10.0 us  
PW3 10.0 us  
PI1 1.000 ms  
PI2 1.000 ms  
PI3 1.00 ms  
IRNUC 1H  
CTEMP 22.7 c  
SIVNT CDCL3  
EXREF 77.00 ppm  
CLEXR 0.00  
RGAIN 30  
OBATN 511  
LOOP1 1

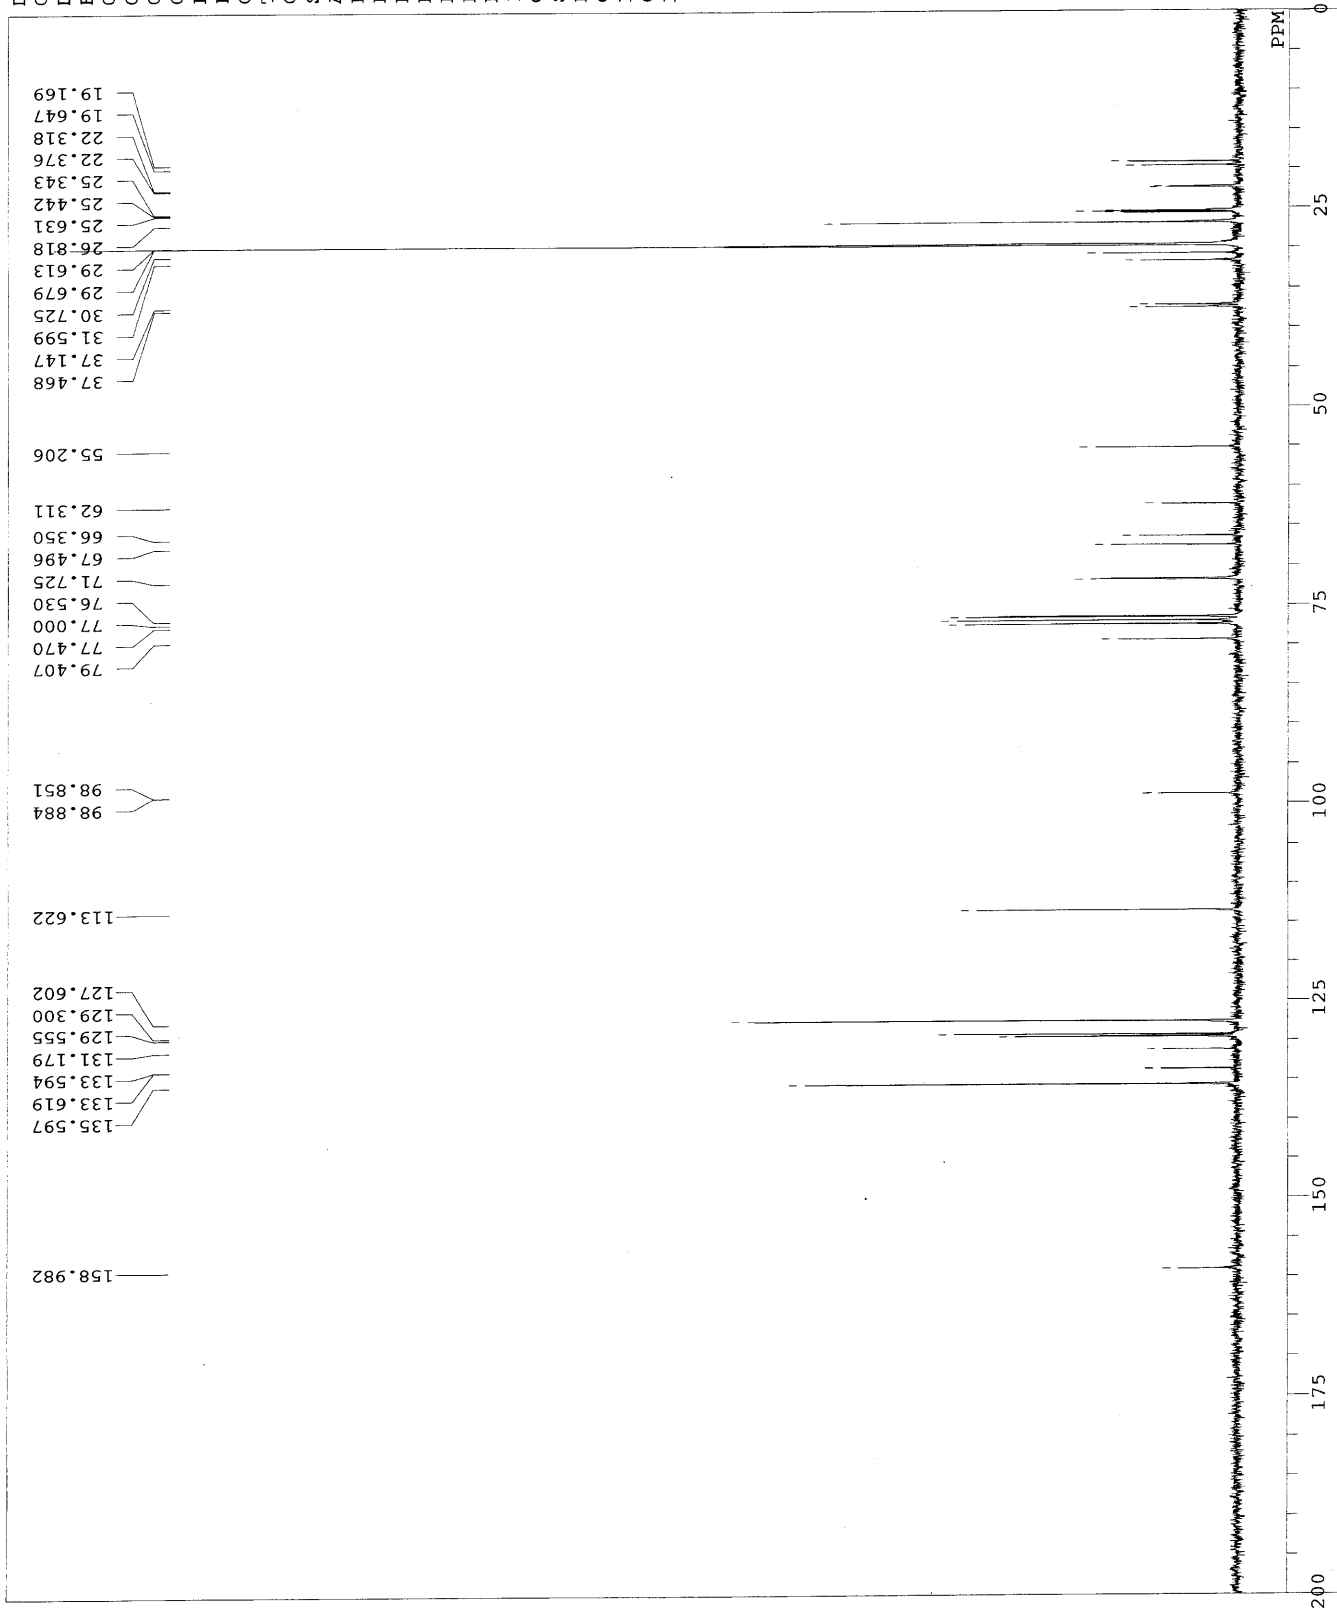

C:\WINMR98\TEMPDATA\Auto2BCM\_E1\_F  
Sun Dec 11 17:37:50 2005  
BCM  
13C

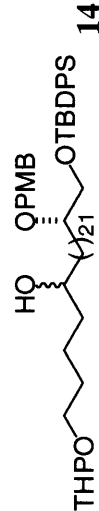

THP-THP-TBDPS(^-^)

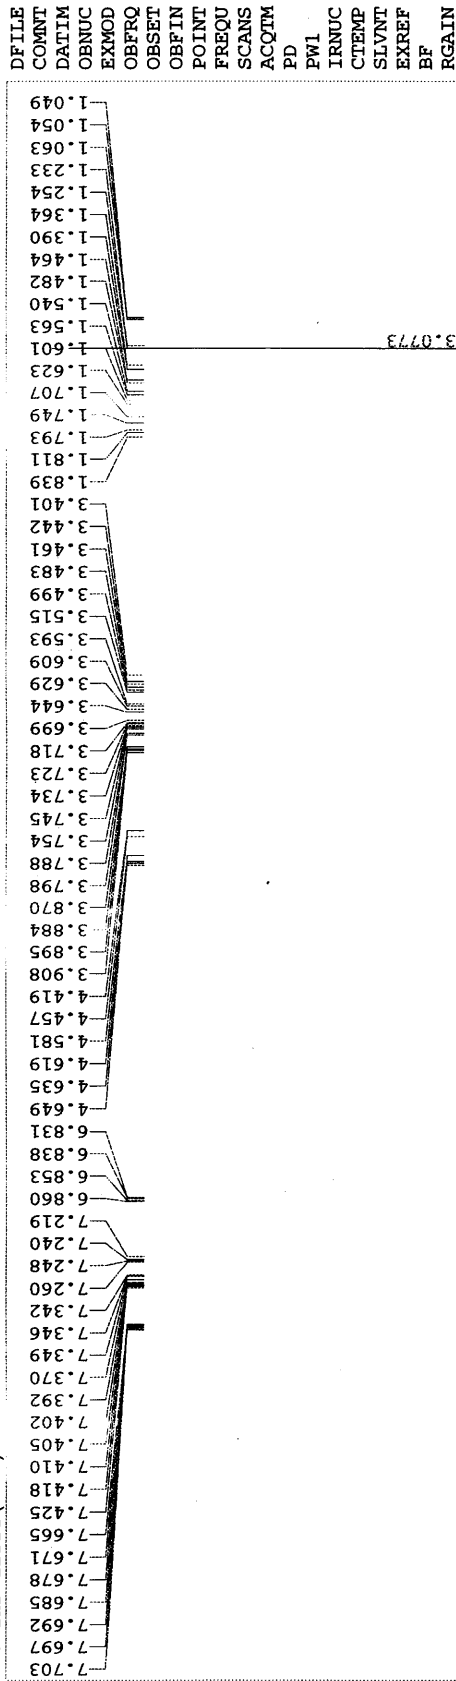

DFILE  
 COMNT THP-THP-TBDPS(^-^)  
 DATIM Wed Feb 08 21:07:50 2006  
 OBNUC 1H  
 EXMOD NON  
 OBFRQ 300.40 MHz  
 OBSET 130.00 KHz  
 OBFIN 1150.0 Hz  
 POINT 32768  
 FREQU 6020.4 Hz  
 SCANS 8  
 ACQTM 5.443 sec  
 PD 1.554 sec  
 PWL 5.4 us  
 IRNUC 1H  
 CTEMP 19.6 c  
 SLVNT CDCL3  
 EXREF 7.26 ppm  
 BF 0.12 Hz  
 RGAIN 17

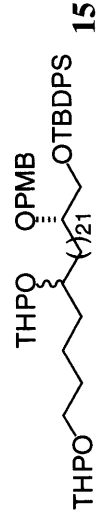

DFILE  
COMNT  
DATIM  
OBNUC  
EXMOD  
OBFRO  
OBSRT  
OBFIN  
POINT  
FREQU  
SCANS  
ACQIM  
PD  
PWI  
IRNUC  
CTEMP  
SLVNT  
EXREF  
BF  
RGAIN

158.947  
135.573  
135.507  
133.562  
133.538  
131.123  
129.540  
129.285  
127.587  
113.576  
98.766  
98.733  
98.700  
98.667  
97.513  
97.357  
94.546  
79.349  
77.420  
77.000  
76.580  
76.440  
71.709  
67.464  
67.415  
66.319  
62.866  
62.627  
62.231  
62.149  
55.168  
34.984  
34.786  
33.426  
33.262  
31.572  
31.144  
30.699  
30.624  
29.907  
29.858  
29.800  
29.677  
29.594  
26.792  
25.589  
25.506  
25.465  
25.391  
25.317  
24.971  
22.276  
21.699  
19.918  
19.696  
19.572  
19.144

C:\WINNR95\TEMPDATA\AUTO2BCM\_E1\_FT.AL  
THPO-THPO-COOH  
Tue Mar 14 21:10:51 2006  
13C  
BCM

75.45 MHz  
124.00 KHz  
1840.0 Hz  
32768  
20408.1 Hz  
320  
1.606 sec  
1.394 sec  
4.1 us  
1H  
20.7 C  
CDCL3  
77.00 ppm  
1.20 Hz  
22

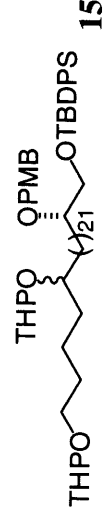

HO-

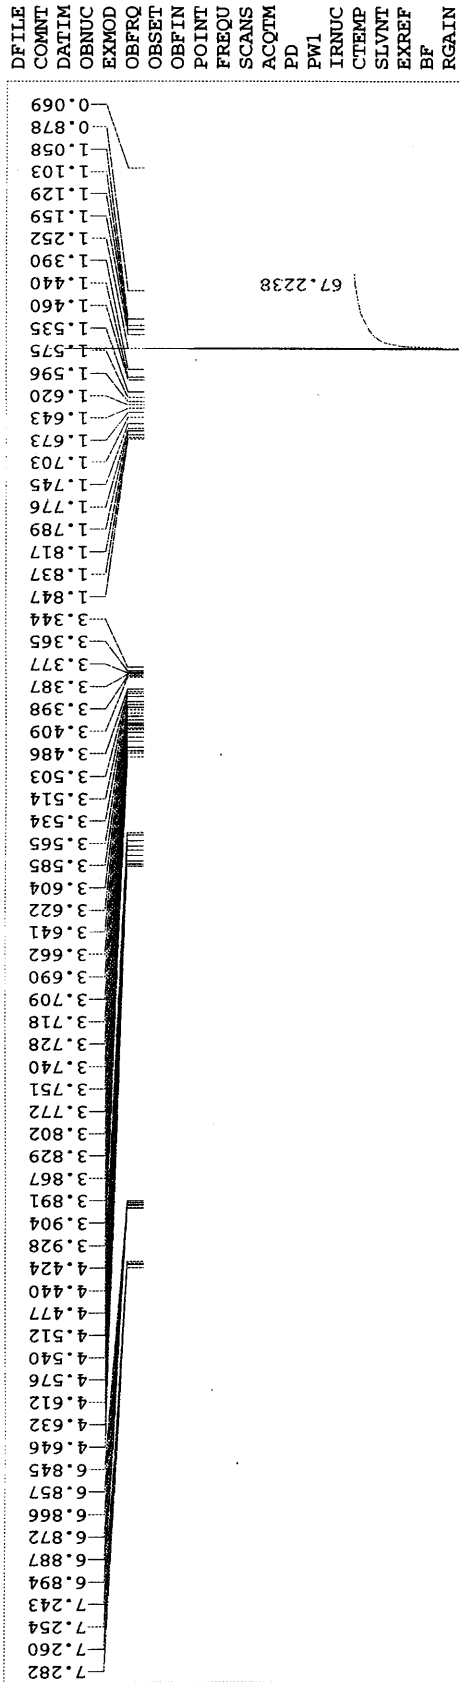

DFILE C:\WINMR95\DATA\AutolNON\_E1\_FT.als  
 COMNT -OH  
 DATIM Sat Feb 11 16:59:31 2006  
 OBNUC 1H  
 EXMOD NON  
 OBFRQ 300.40 MHz  
 OBSET 130.00 KHz  
 OBFIN 1150.0 Hz  
 POINT 32768  
 FREQU 6020.4 Hz  
 SCANS 8  
 ACQTM 5.443 sec  
 PD 1.554 sec  
 PWI 5.4 us  
 IRNUC 1H  
 CTEMP 20.8 C  
 SLVNT CDCL3  
 EXREF 7.26 ppm  
 BF 0.12 Hz  
 RGAIN 11

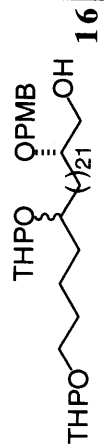



-OH  
Sat Feb 11 17:48:02 2006

Figure 1 is a schematic diagram of a multi-layered structure, likely a geological cross-section or a composite material. The diagram shows a central vertical axis with various layers and boundaries. On the left side, numerical values are listed, corresponding to different layers or depths. On the right side, there are labels for different regions or materials. The diagram is divided into several sections by horizontal lines, and some sections are further subdivided by vertical lines. The overall structure is symmetrical about the central axis.

Labels on the left side (from top to bottom):

- 19.605
- 19.951
- 22.309
- 25.004
- 25.366
- 25.465
- 25.531
- 25.630
- 29.545
- 29.693
- 29.775
- 29.841
- 29.932
- 30.731
- 30.797
- 31.168
- 33.451
- 34.811
- 35.009
- 55.250
- 62.215
- 62.280
- 62.651
- 64.275
- 67.464
- 67.514
- 71.148
- 76.489
- 76.580
- 77.000
- 77.206
- 77.429
- 79.431
- 97.555
- 98.783
- 113.626
- 113.848
- 129.384
- 130.554
- 159.227

Labels on the right side (from top to bottom):

- 19.605
- 19.951
- 22.309
- 25.004
- 25.366
- 25.465
- 25.531
- 25.630
- 29.545
- 29.693
- 29.775
- 29.841
- 29.932
- 30.731
- 30.797
- 31.168
- 33.451
- 34.811
- 35.009
- 55.250
- 62.215
- 62.280
- 62.651
- 64.275
- 67.464
- 67.514
- 71.148
- 76.489
- 76.580
- 77.000
- 77.206
- 77.429
- 79.431
- 97.555
- 98.783
- 113.626
- 113.848
- 129.384
- 130.554
- 159.227

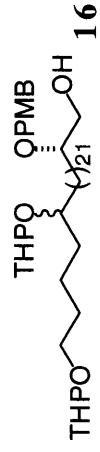

No.110-down

DFILE  
COMNT  
DATIM  
OBNUC  
EXMOD  
OBFRO  
OBSET  
OBFIN  
POINT  
FREQU  
SCANS  
ACQTM  
PD  
PWL  
IRNUC  
CTEMP  
SLVNT  
EXREF  
BF  
RGAIN

C:\WINNMR95\DATA\AutolNON\_EI\_FT.a  
No.110-down  
Thu Feb 09 13:54:43 2006  
1H  
NON  
300.40 MHz  
130.00 KHz  
1150.0 Hz  
32768  
6020.4 Hz  
64  
5.443 sec  
1.554 sec  
5.4 us  
1H  
18.8 c  
CDCL3  
7.26 ppm  
0.12 Hz  
16

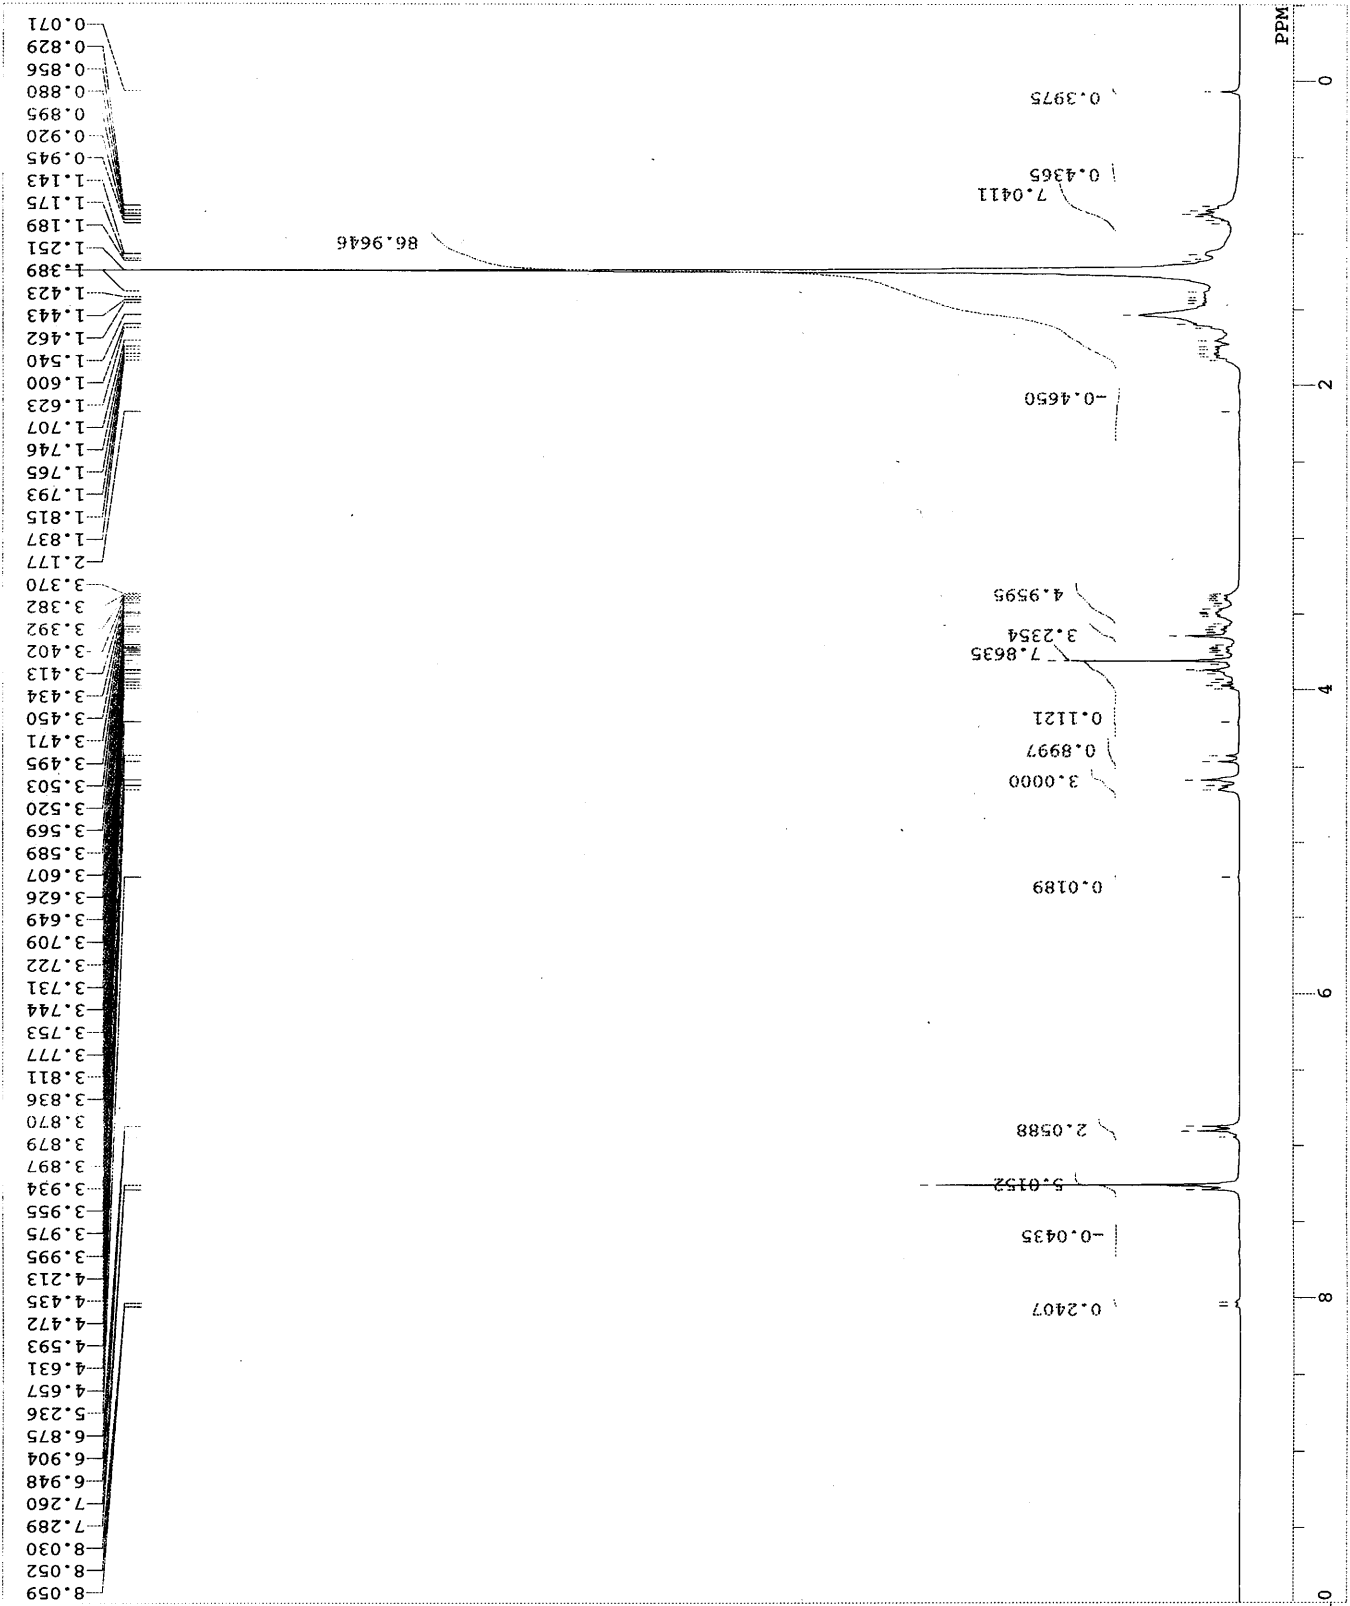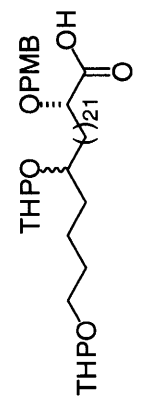

```

D:\FILE C:\WINNMR95\DATA\Auto1NON E1 FT.a.

```

```

C:\WINMR95\DATA\Auto1NON_E1_FT.a
COMMT No.111-TM
DATIM Tue Feb 07 18:15:34 2006

```

DFILE COMNT DATIM OBNUC EXMOD OBFRQ OBSET OBFIN POINT FREQU SCANS ACQTM PD PW1 IRNUC CTEMP SLVNT EXREF BF RGAIN

0.071  
0.832  
0.857  
0.881  
0.896  
0.921  
0.946  
0.982  
1.132  
1.145  
1.189  
1.213  
1.254  
1.423  
1.441  
1.459  
1.479  
1.485  
1.494  
1.504  
1.524  
1.538  
1.546  
1.551  
1.579  
1.589  
1.596  
1.608  
1.723  
1.746  
1.765  
1.778  
1.794  
1.818  
1.874  
2.178  
2.324  
2.348  
3.470  
3.494  
3.572  
3.608  
3.651  
3.673  
3.693  
3.799  
3.814  
3.958  
3.978  
3.997  
4.377  
4.396  
4.440  
4.478  
4.585  
4.623  
4.657  
4.667  
5.302  
6.853  
6.868  
6.877  
6.884  
6.899  
6.907  
6.916  
7.260  
7.281  
7.288  
7.343  
7.605

55.2080

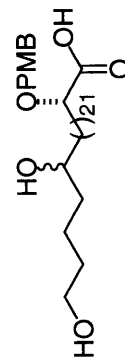

17

DF11E  
COMNT diol-COOH  
DATIM Fri Aug 06 08:31:57 2004  
OBNUC 13C  
EXMOD BCM  
OBFRQ 67.80 MHz  
OBSET 135.00 KHz  
OBFIN 5200.0 Hz  
POINT 32768  
FREQU 18348.6 Hz  
SCANS 10000  
ACQTM 1.786 sec  
PD 1.211 sec  
PWL 3.7 us  
IRNUC 1H  
CTEMP 20.9 c  
SLVNT CDCL3  
EXREF 77.00 ppm  
BF 1.20 Hz  
RGAIN 30

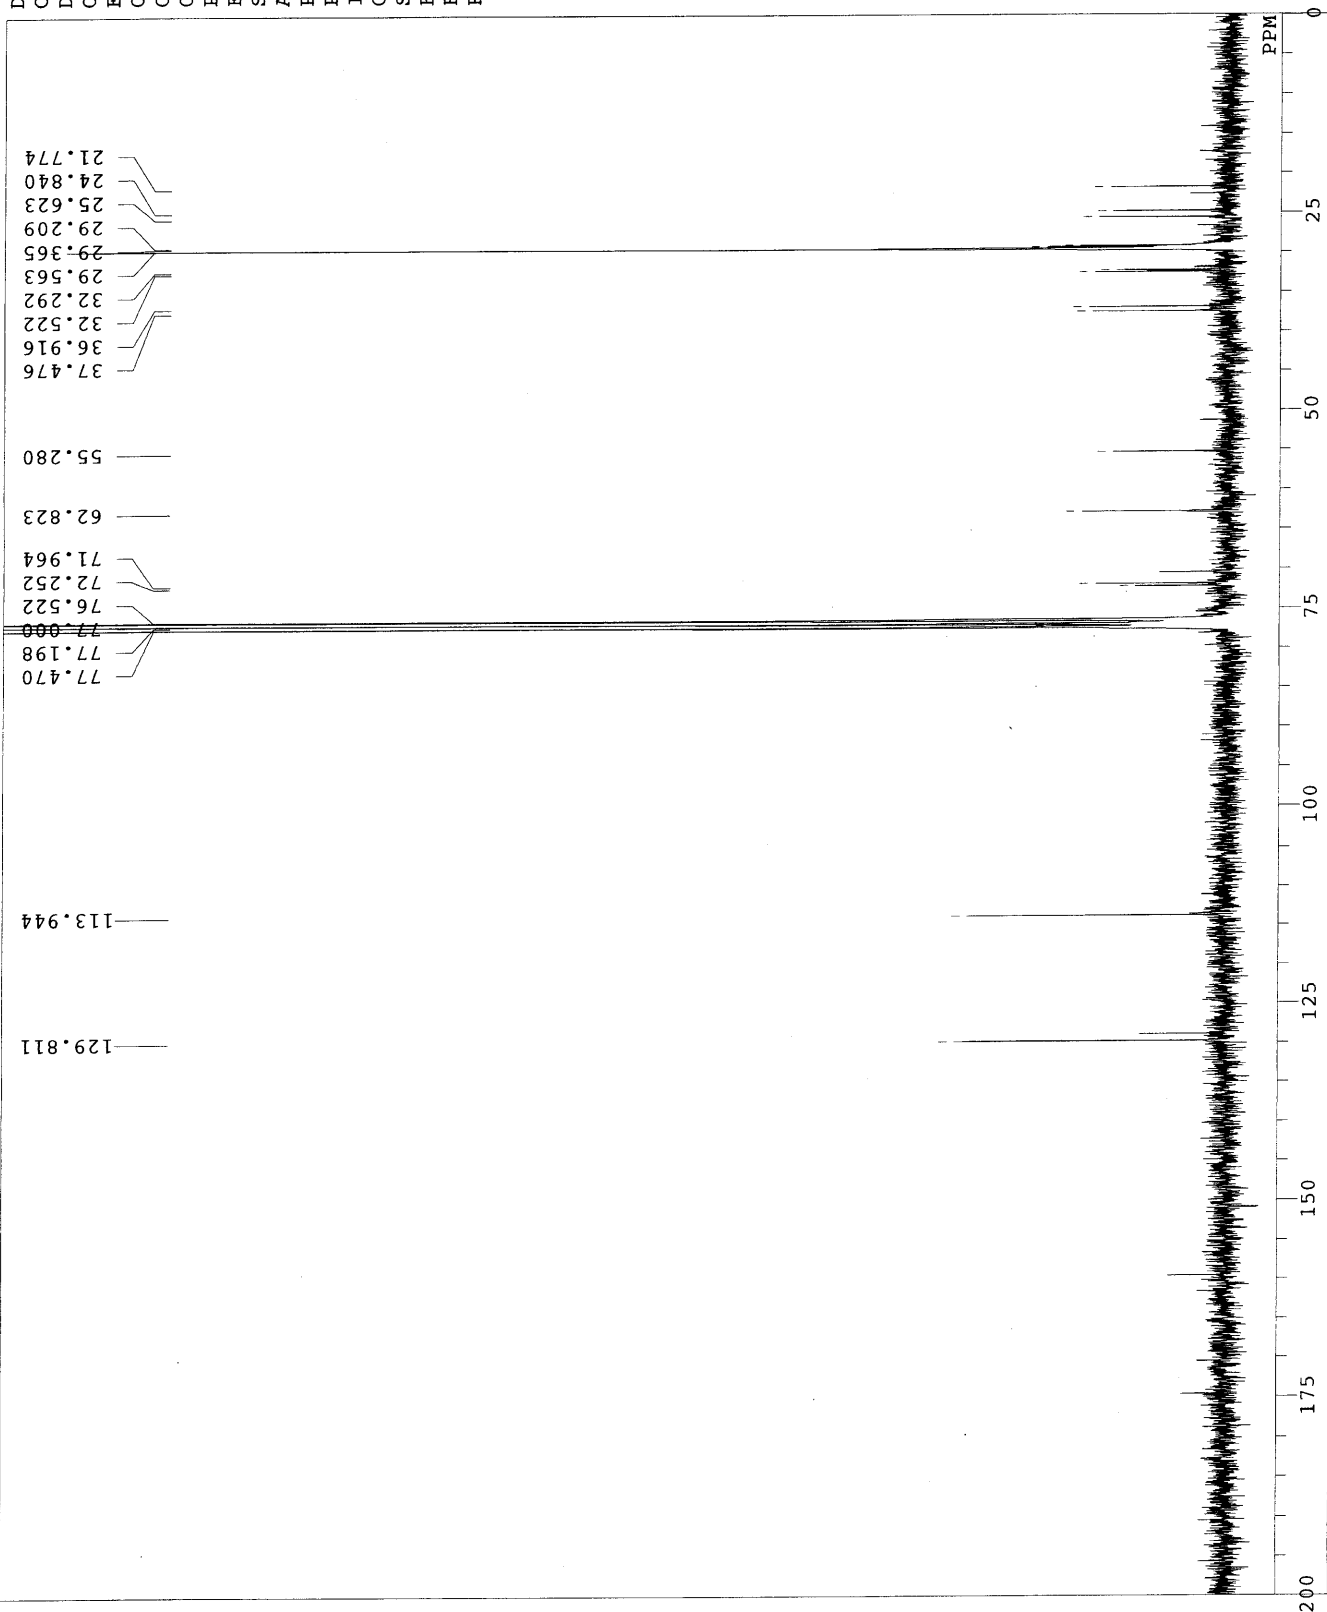

C:\WinLambda\AutoData\Autolnon\_E1

DFILE OBNUC 1H  
EXMOD non  
OFR 500.00 MHz  
OBSET 0.00 KHz  
OBFIN 162160.00 Hz  
POINT 32768  
FREQU 10000.00 Hz  
SCANS 32  
ACQTM 3.2768 sec  
PD 3.7232 sec  
PW1 6.38 usec  
IRN 24.4 C  
CTEMP CDCL3  
SLVNT 7.26 ppm  
EXREF 0.12 Hz  
BF 15  
RGAIN

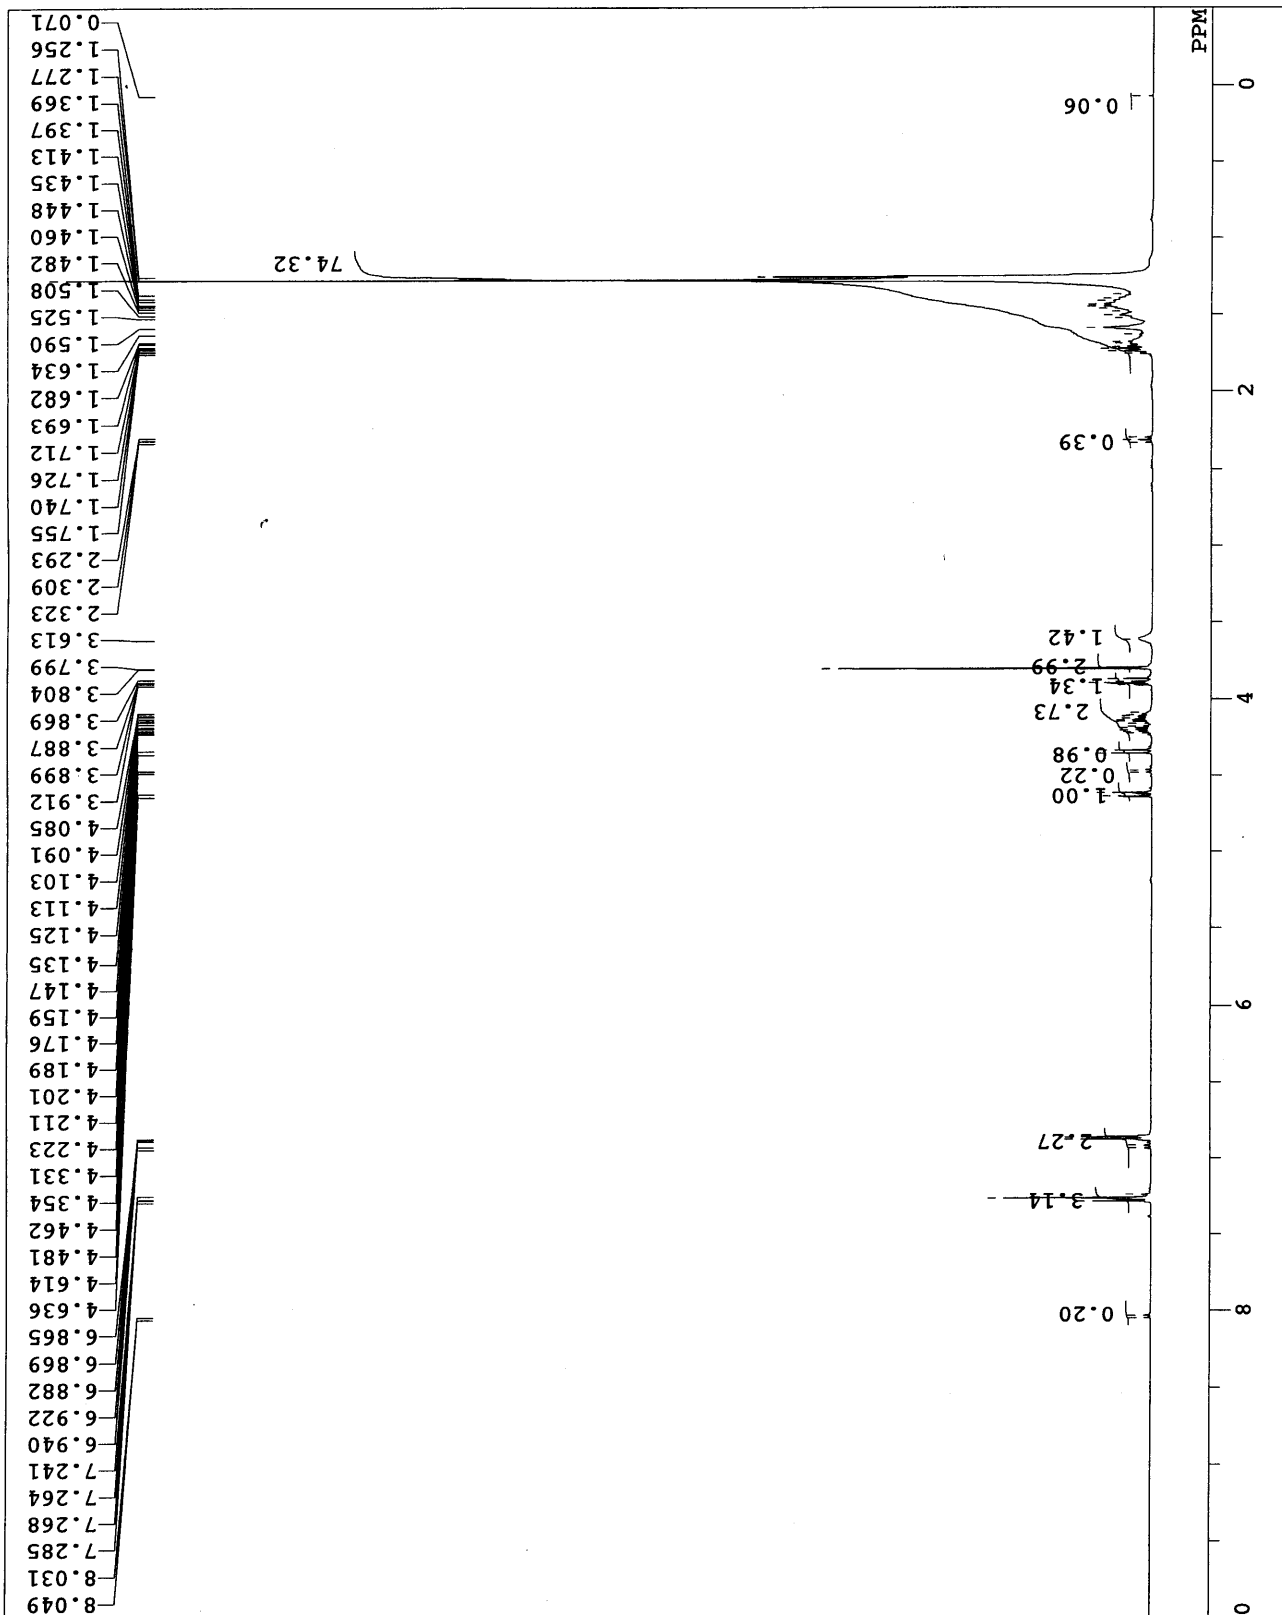

C:\WINNMR95\DATA\Shiina\_Lab\akane\19 c

DFILE 43-4  
COMNT 43-4  
DATIM Wed Jun 28 05:27:09 2006  
OBNUC 13C  
EXMOD BCM  
OBFRQ 75.45 MHz  
OBSET 124.00 KHz  
OBFIN 1840.0 Hz  
POINT 32768  
FREQU 20408.1 Hz  
SCANS 8000  
ACQTM 1.606 sec  
PD 1.394 sec  
PW1 4.1 us  
IRNUC 1H  
CTEMP 21.5 c  
SLVNT CDCL3  
EXREF 77.00 ppm  
BF 1.20 Hz  
RGAIN 22

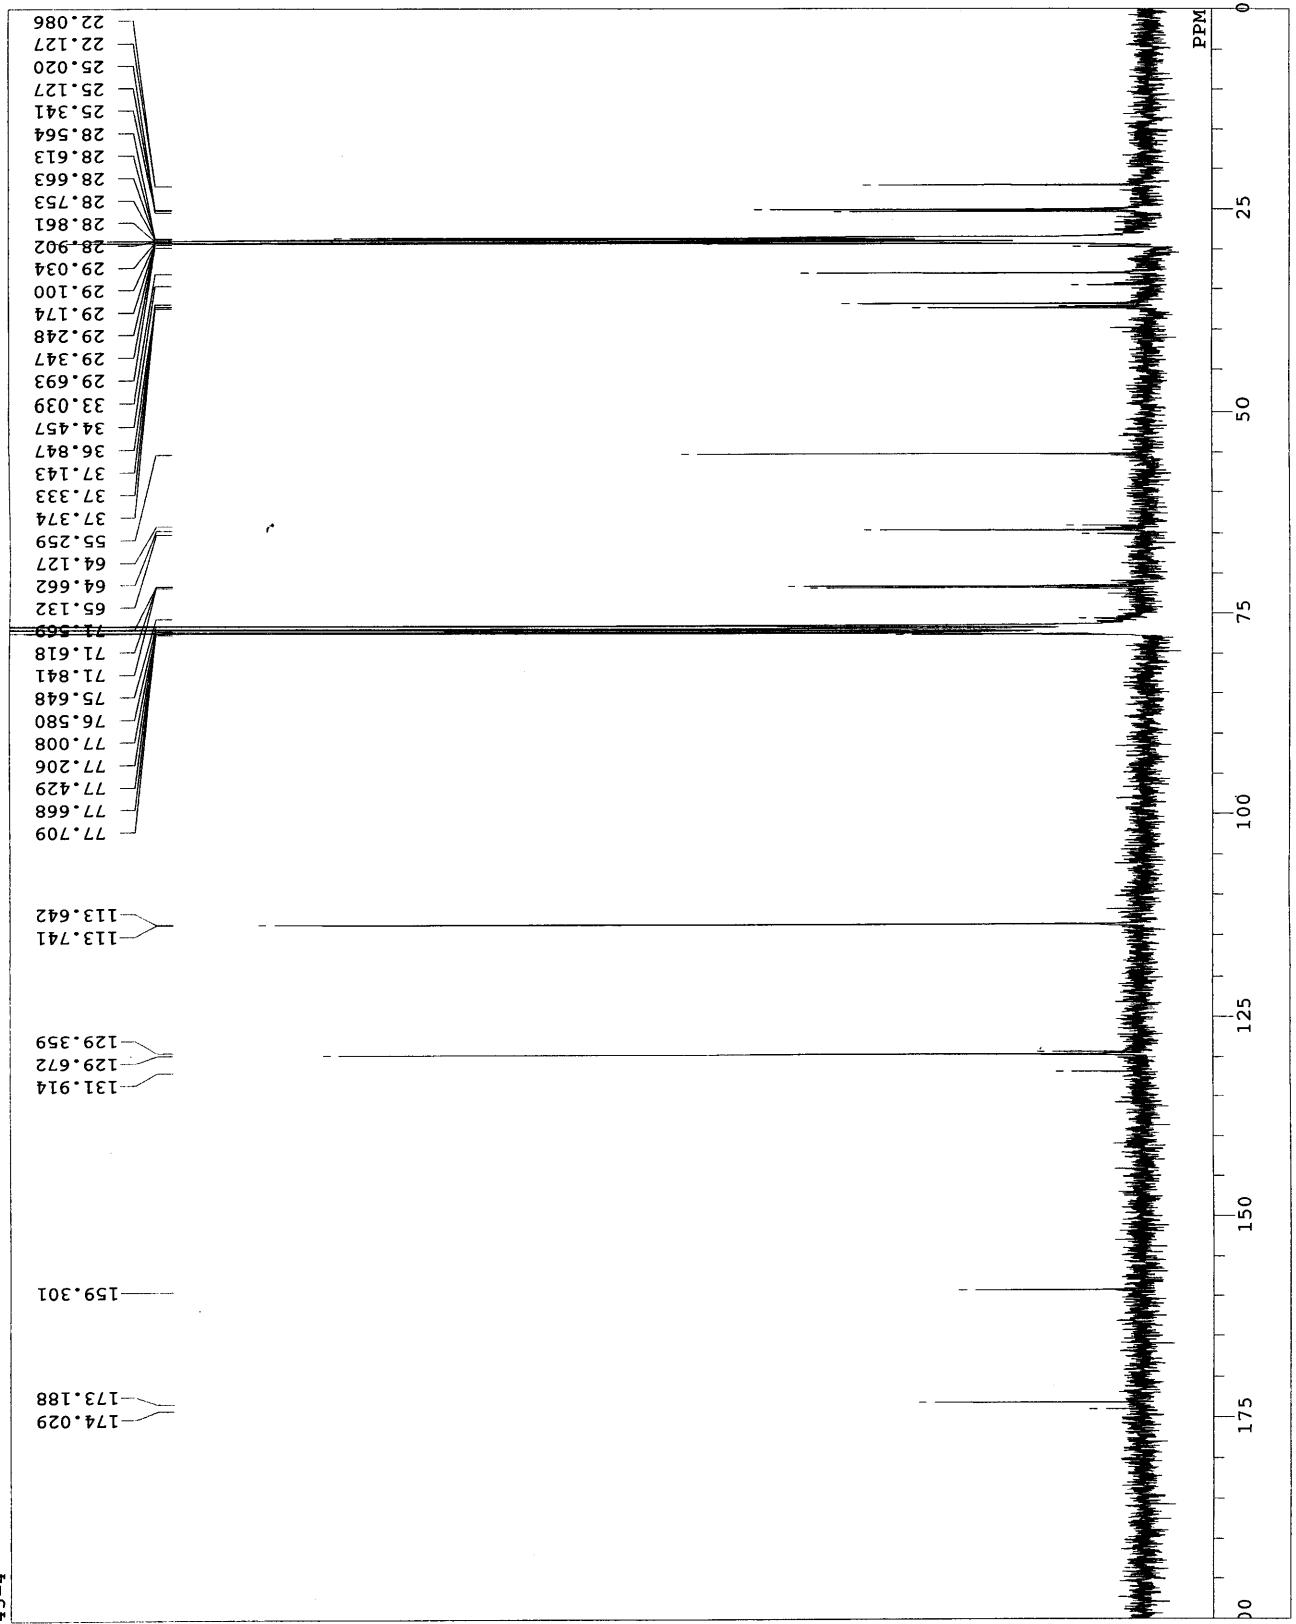

C:\WINNMR98\DATA\Auto1NON\_E1\_FT.als

DFILE  
COMNT  
DATIM  
EXMOD  
OBNUC  
OBFRQ  
OBSET  
OBFIN  
POINT  
FREQU  
CLPNT  
TODAT  
CLFRQ  
SCANS  
ACQTM  
PD  
PW1  
PW2  
PW3  
PI1  
PI2  
PI3  
IRNUC  
CTEMP  
SIVNT  
EXREF  
CLEXR  
RGAIN  
OBAIN  
LOOP1

Term  
Wed Sep 28 10:13:02 2005  
NON  
1H

270.05 MHz  
112.00 KHz  
5800.0 Hz  
32768  
5405.4 Hz  
1  
1  
100.0 Hz  
6.062 sec  
0.935 sec  
6.0 us  
10.0 us  
10.0 us  
1.000 ms  
1.000 ms  
1.00 ms  
1H  
24.1 C  
CDCL3  
7.26 ppm  
0.00  
17  
511  
1

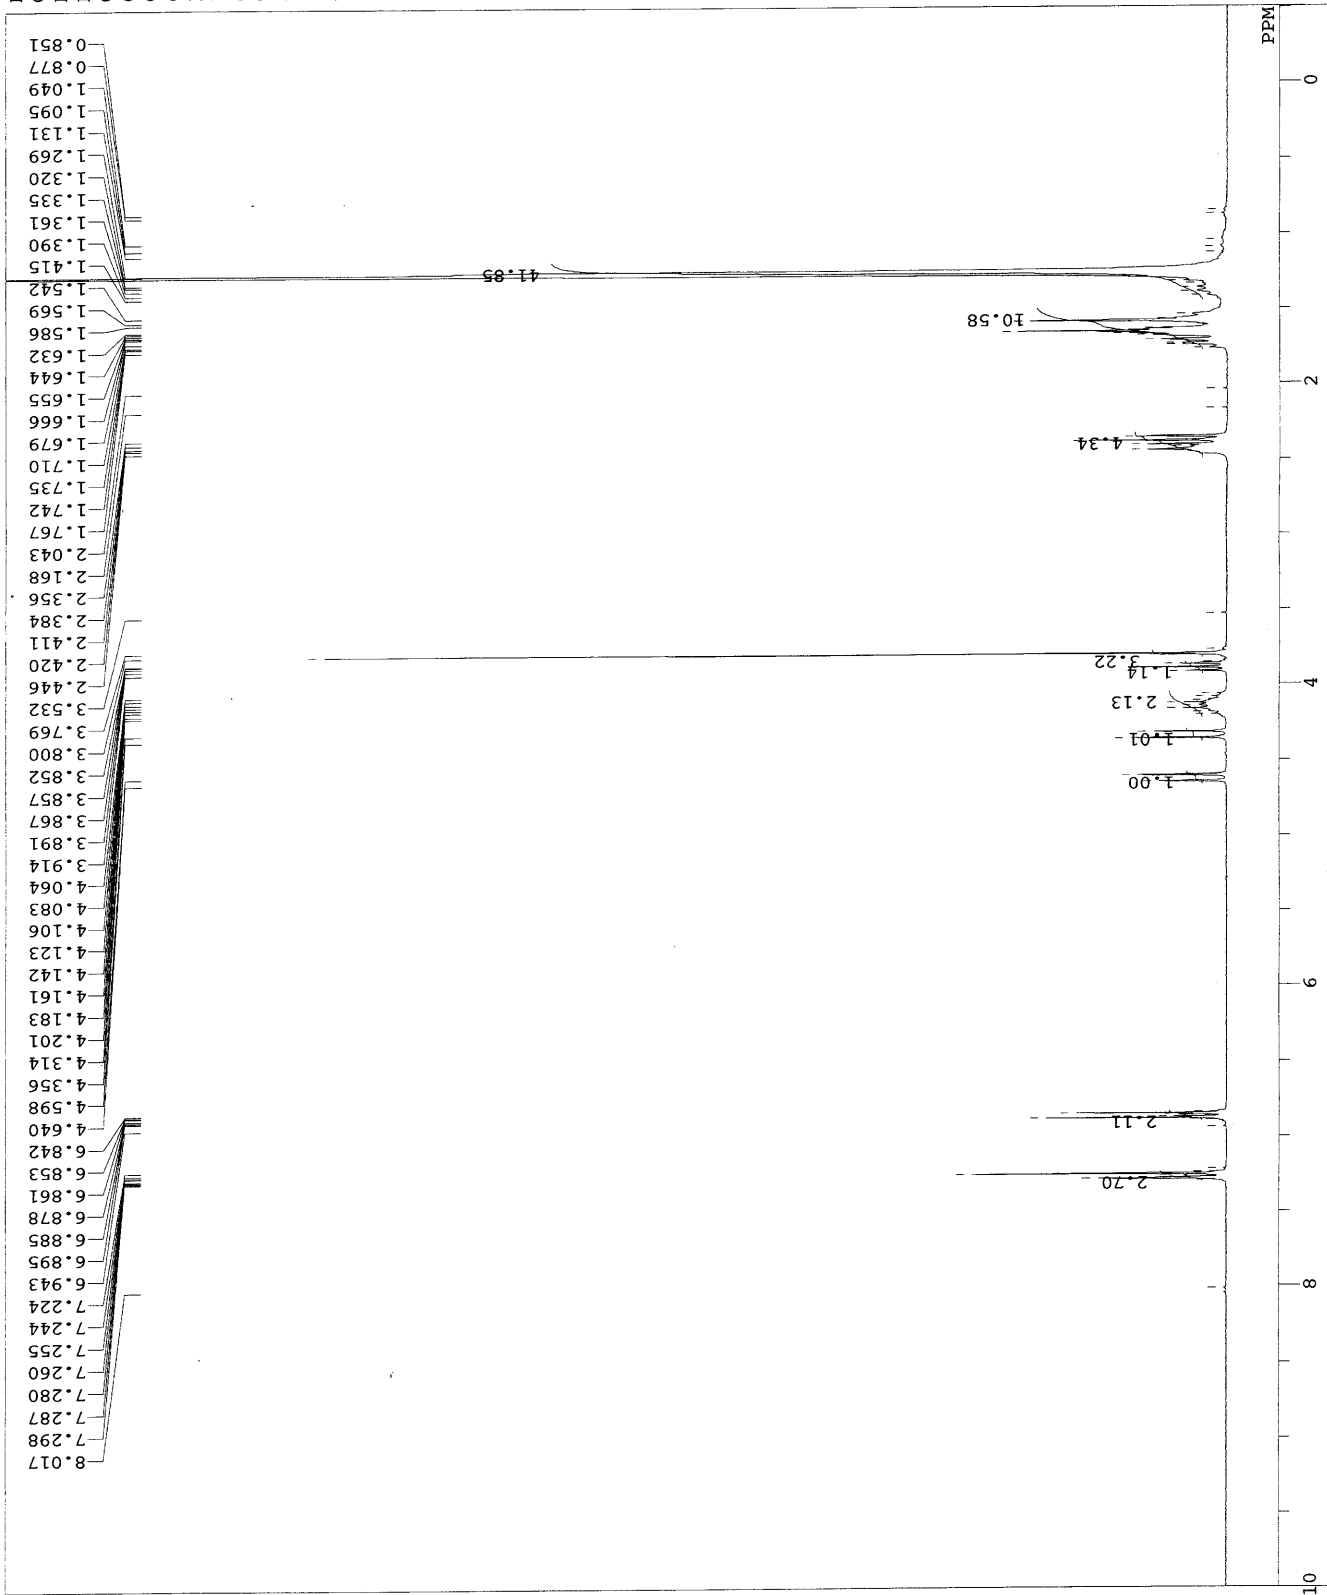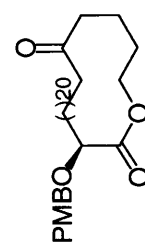

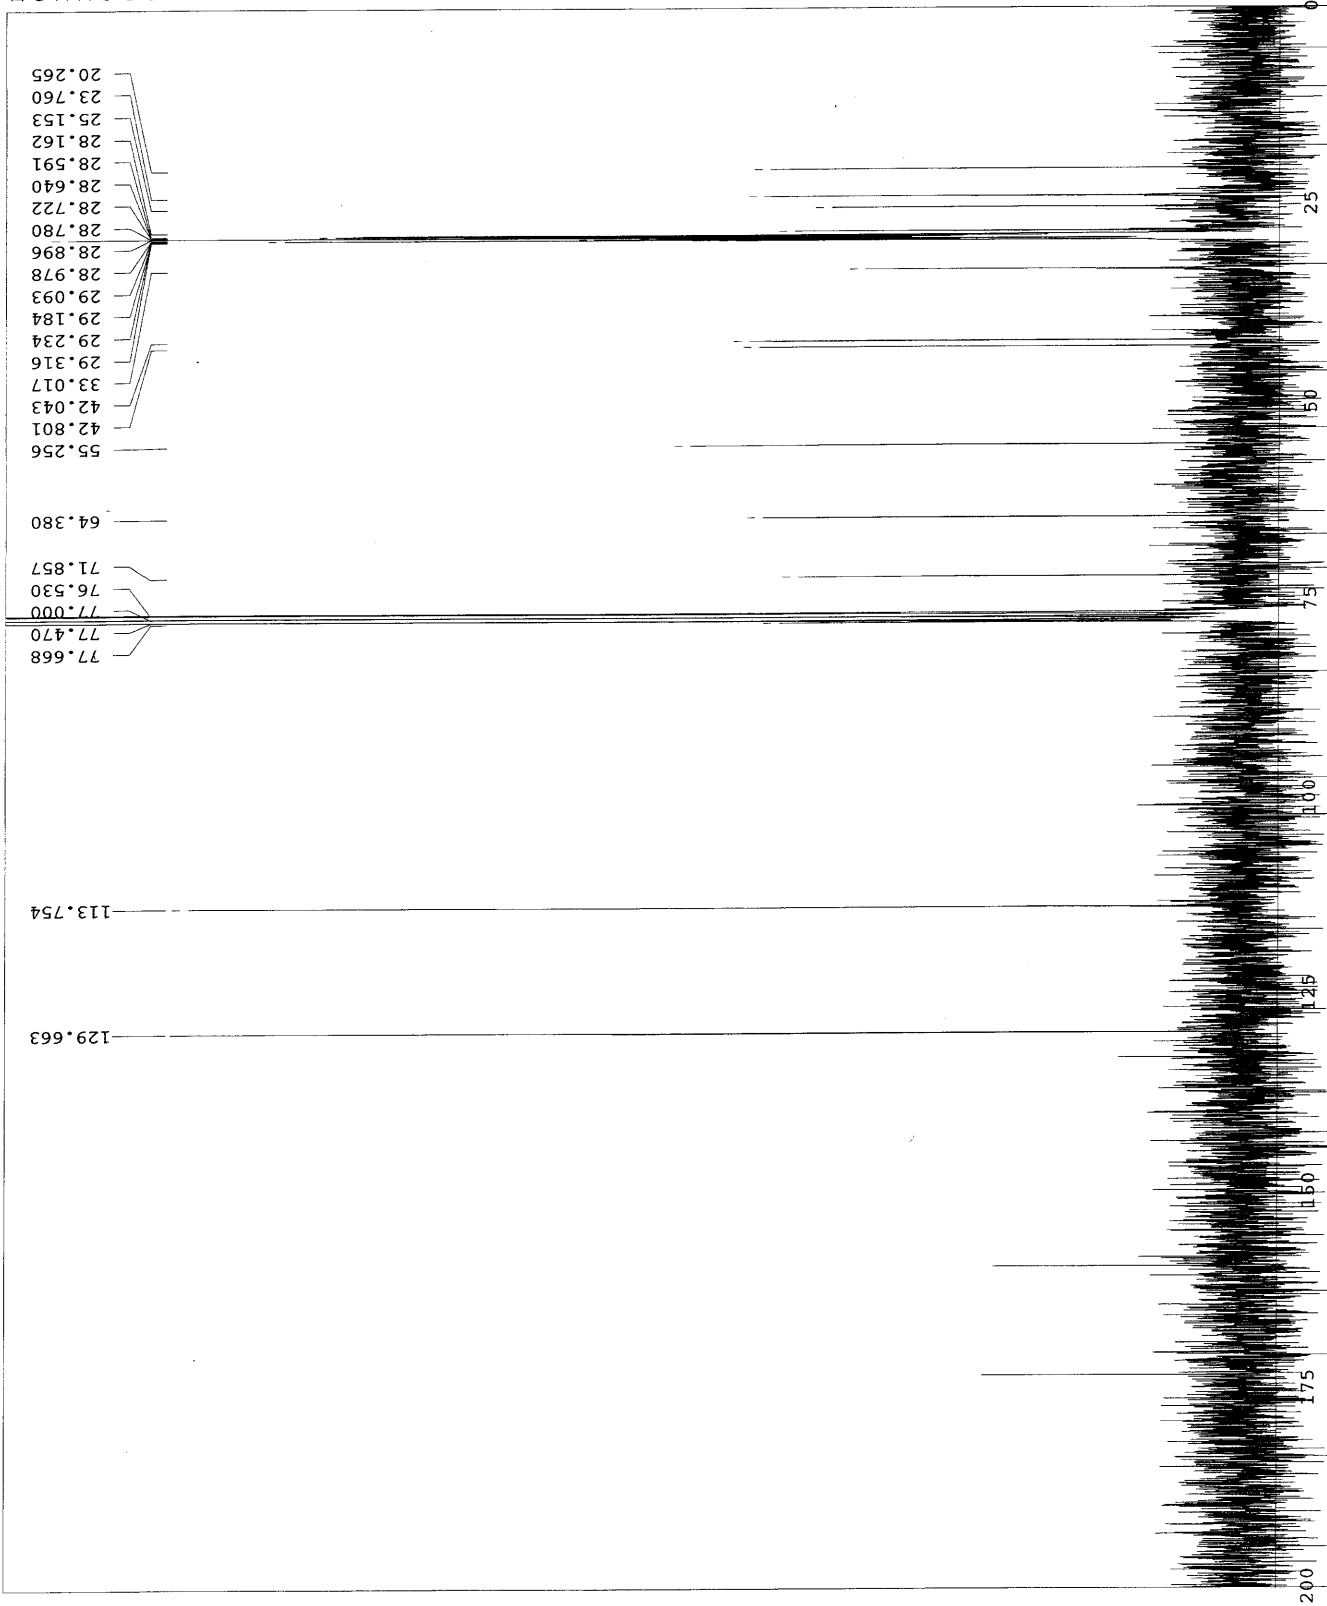

DFILE C:\WINNMR98\TEMPDATA\Auto2BCM\_E1\_F  
COMNT Term  
DATIM Wed Sep 28 10:31:25 2005  
EXMOD BCM  
OBNUC 13C  
OBFRQ 67.80 MHz  
OBSET 135.00 KHz  
OBFIN 5200.0 Hz  
POINT 32768  
FREQU 18348.6 Hz  
CLPNT 1  
TODAT 1  
CLFRQ 500.0 Hz  
SCANS 360  
ACQTM 1.786 sec  
PD 1.211 sec  
PW1 3.8 us  
PW2 10.0 us  
PW3 10.0 us  
PI1 1.000 ms  
PI2 1.000 ms  
PI3 1.00 ms  
IRNUC 1H  
CTEMP 23.7 c  
SLVNT CDCL3  
EXREF 77.00 ppm  
CLEXR 0.00  
RGAIN 30  
OBATN 511  
LOOP1 1

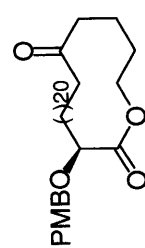



C:\WinLambda\TEMPDATA\Autolnon

DFILE  
OBNUC 1H  
EXMOD non  
OFR 500.00 MHz  
OBSET 0.00 KHz  
OBFIN 162160.00 Hz  
POINT 32768  
FREQU 10000.00 Hz  
SCANS 8  
ACQTM 3.2768 sec  
PD 3.7232 sec  
PWL 6.38 usec  
IRN 24.3 C  
CTEMP CDCL3  
SLVNT 0.00 ppm  
EXREF 0.12 Hz  
BF 17  
RGAIN

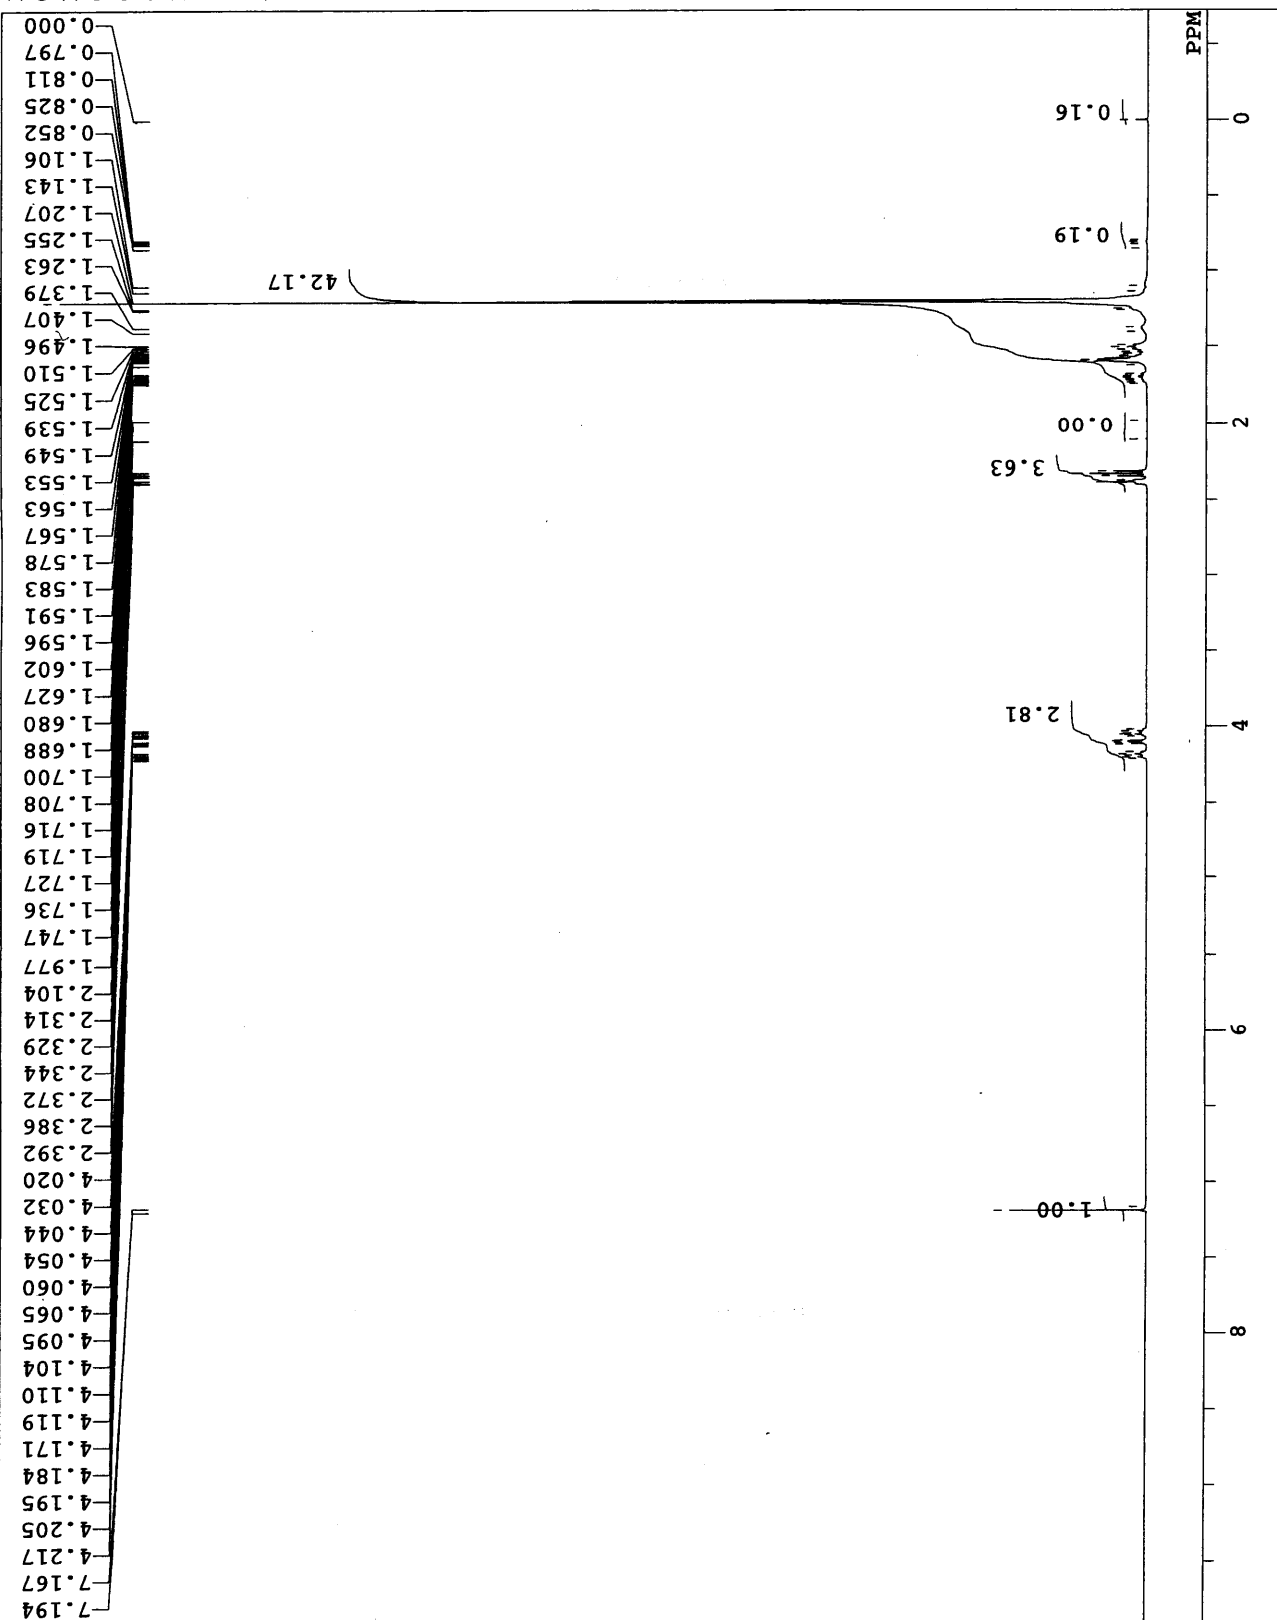

E24-SM Spure

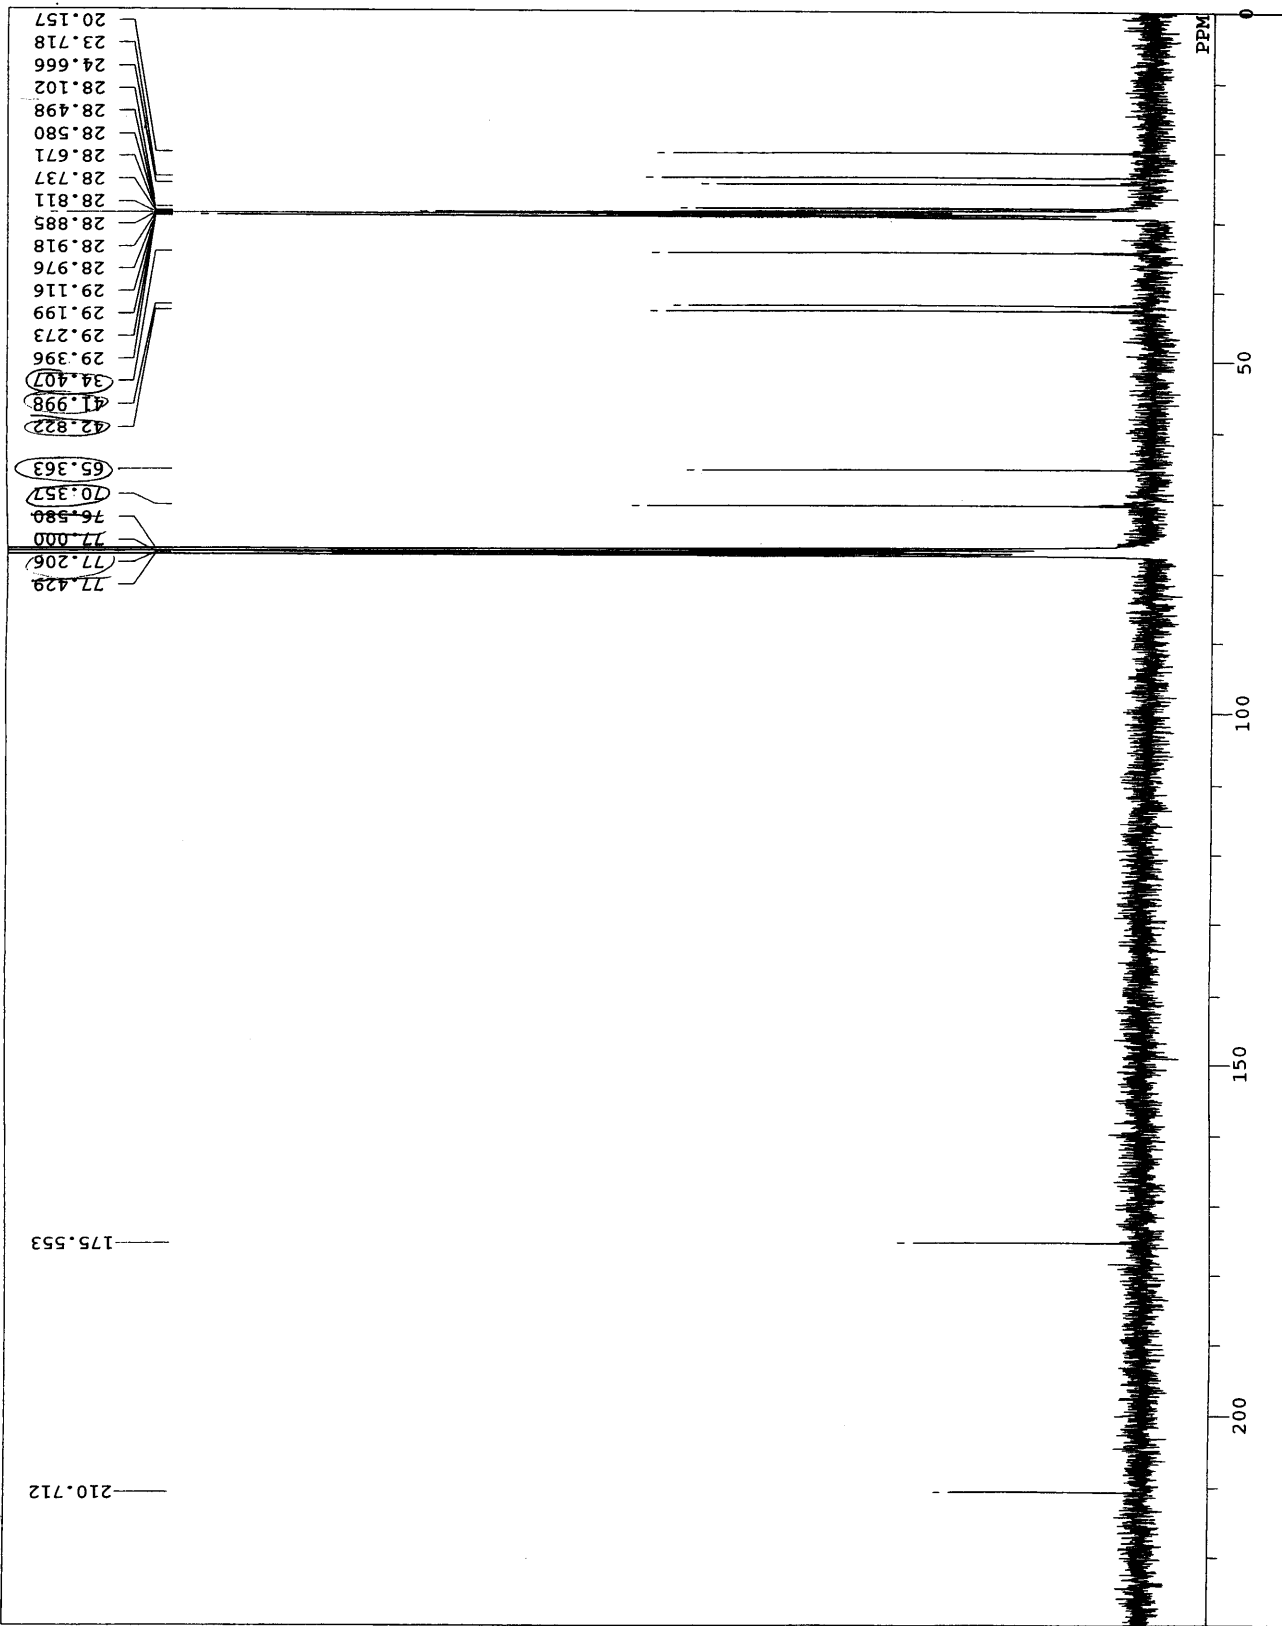

DFILE COMNT E24-SM Spure  
 DATIM Thu Jun 29 04:52:20 2006  
 OBNUC 13C  
 EXMOD BCM  
 OBFRQ 75.45 MHz  
 OBSET 124.00 KHz  
 OBFIN 1840.0 Hz  
 POINT 32768  
 FREQU 20408.1 Hz  
 SCANS 8000  
 ACQTM 1.606 sec  
 PD 1.394 sec  
 PW1 4.1 us  
 IRRUC 1H  
 CTEMP 21.6 c  
 SLVNT CDCL3  
 EXREF 77.00 ppm  
 BF 1.20 Hz  
 RGAIN 22

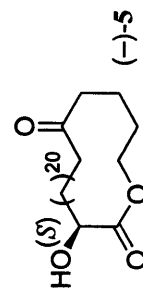

DFILE S  
COMNT S  
DATIM Wed Dec 21 14:59:52 2005  
EXMOD NON  
OBNUC 1H  
OBFRQ 270.05 MHz  
OBSET 112.00 KHz  
OBFIN 5800.0 Hz  
POINT 32768  
FREQU 5405.4 Hz  
CLPNT 1  
TODAT 1  
CLFRQ 100.0 Hz  
SCANS 180  
ACQTM 6.062 sec  
PD 0.935 sec  
PW1 6.0 us  
PW2 10.0 us  
PW3 10.0 us  
PI1 1.000 ms  
PI2 1.000 ms  
PI3 1.00 ms  
IRNUC 1H  
CTEMP 19.6 C  
SIVNT CDCL3  
EXREF 7.26 ppm  
CLEXR 0.00  
RGAIN 26  
OBATN 511  
LOOP1 1

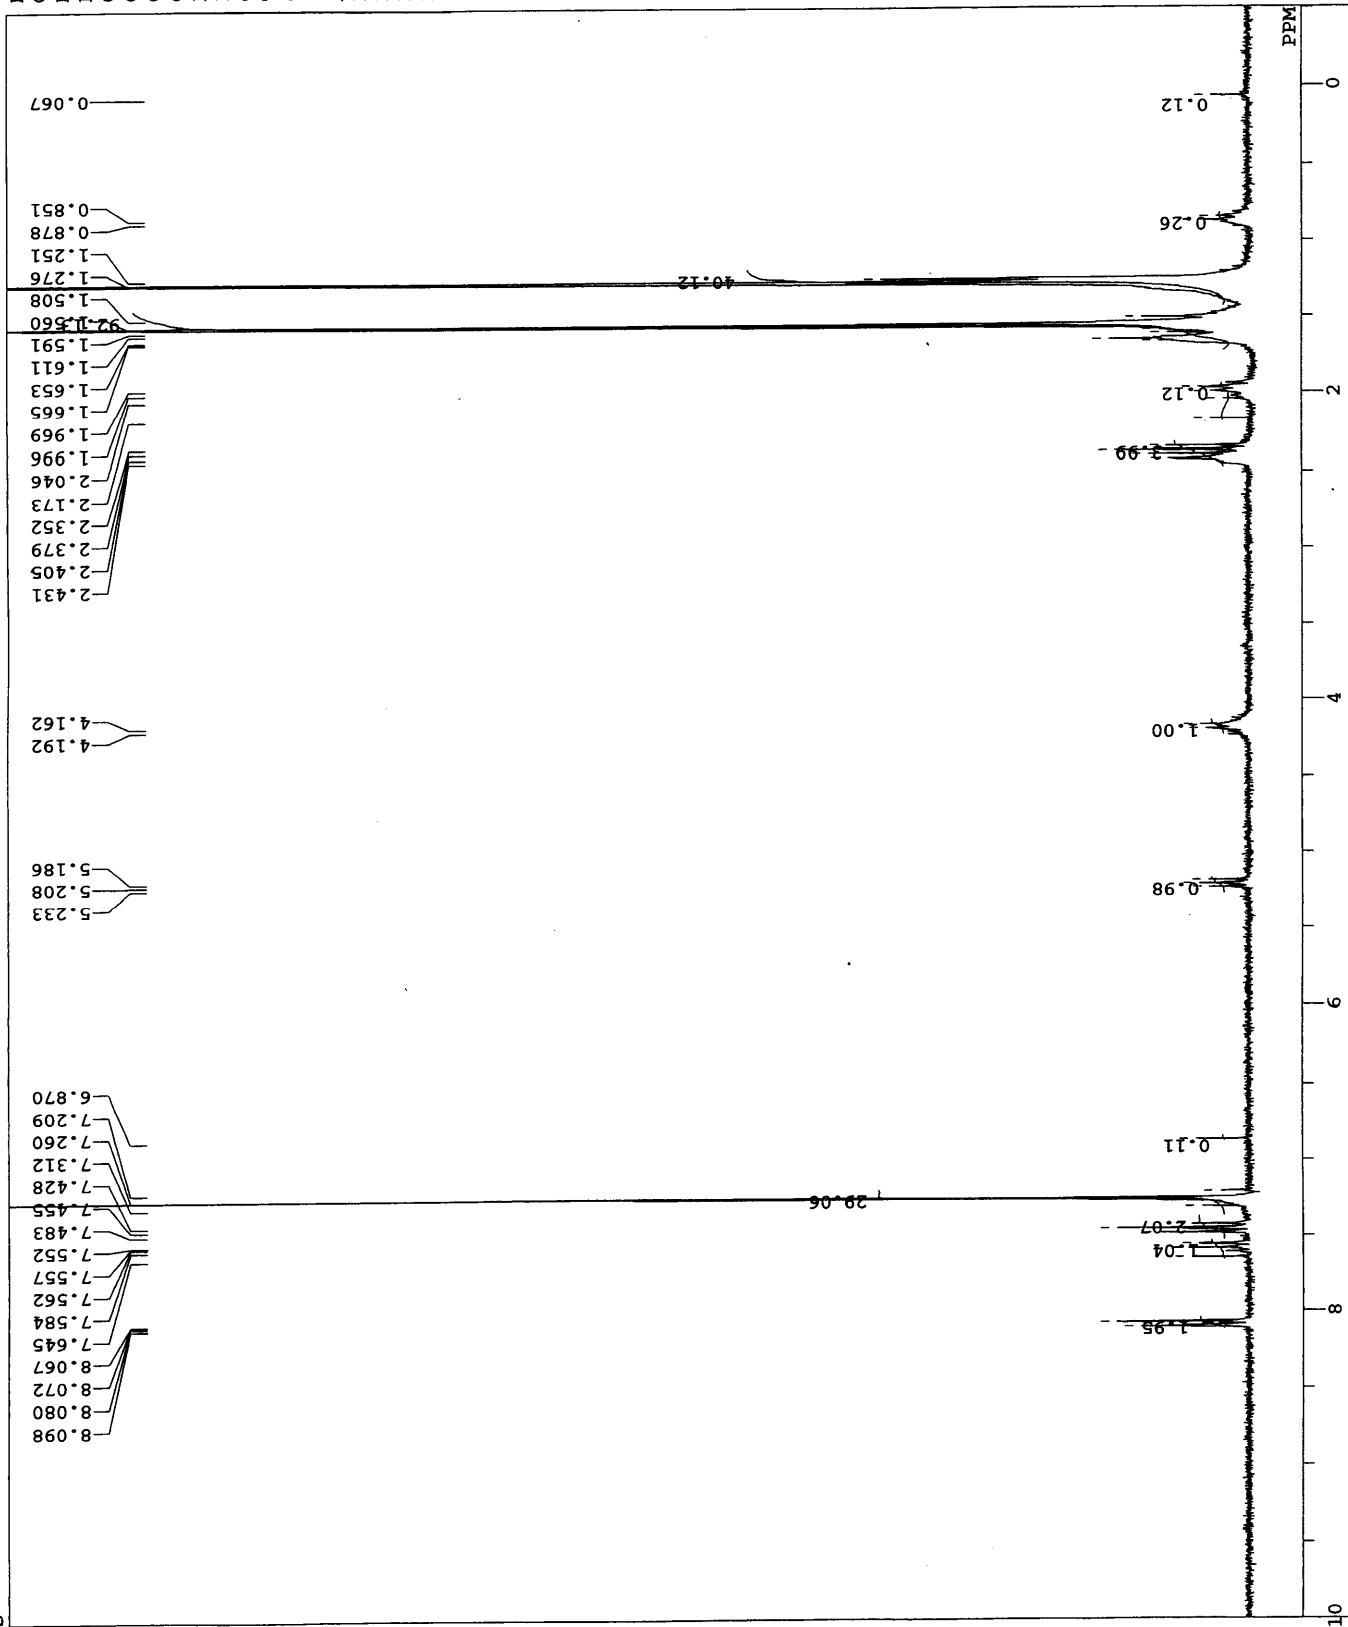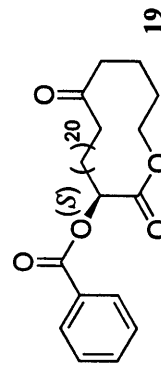

DFILE COMPT R  
DATIM Wed Dec 21 15:27:12 2005  
EXMOD NON  
OBNUC 1H

OBFRQ 270.05 MHz  
OBSET 112.00 KHz  
OBFIN 5800.0 Hz  
POINT 32768  
FREQU 5405.4 Hz  
CLPNT 1  
TODAT 1  
CLFRQ 100.0 Hz  
SCANS 180  
ACQTM 6.062 sec  
PD 0.935 sec  
PW1 6.0 us  
PW2 10.0 us  
PW3 10.0 us  
PI1 1.000 ms  
PI2 1.000 ms  
PI3 1.00 ms  
IRNUC 1H  
CTEMP 18.8 c  
SLVNT CDCL3  
EXREF 7.26 ppm  
CLEXR 0.00  
RGAIN 25  
OBATN 511  
LOOP1 1

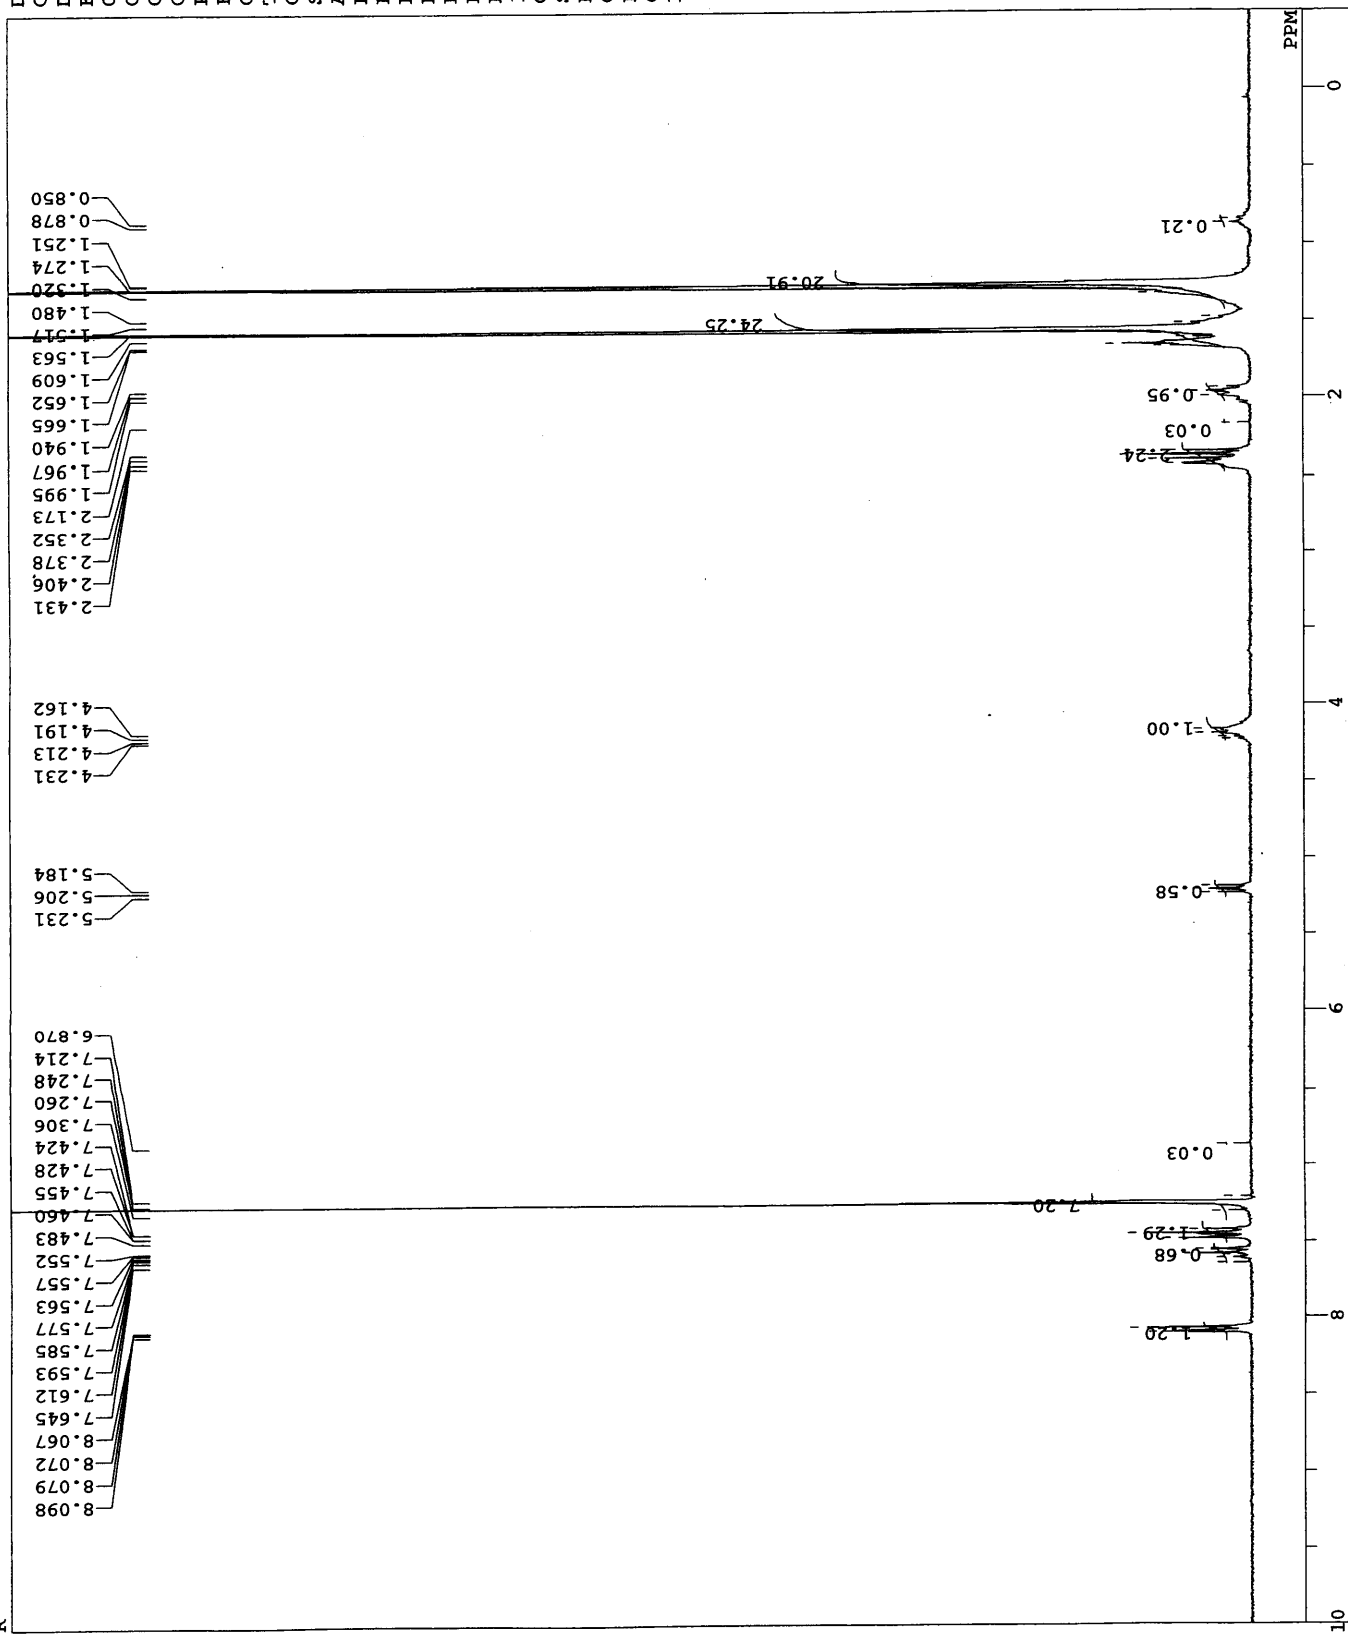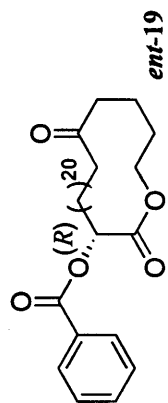

(R)-3,5-dinitro

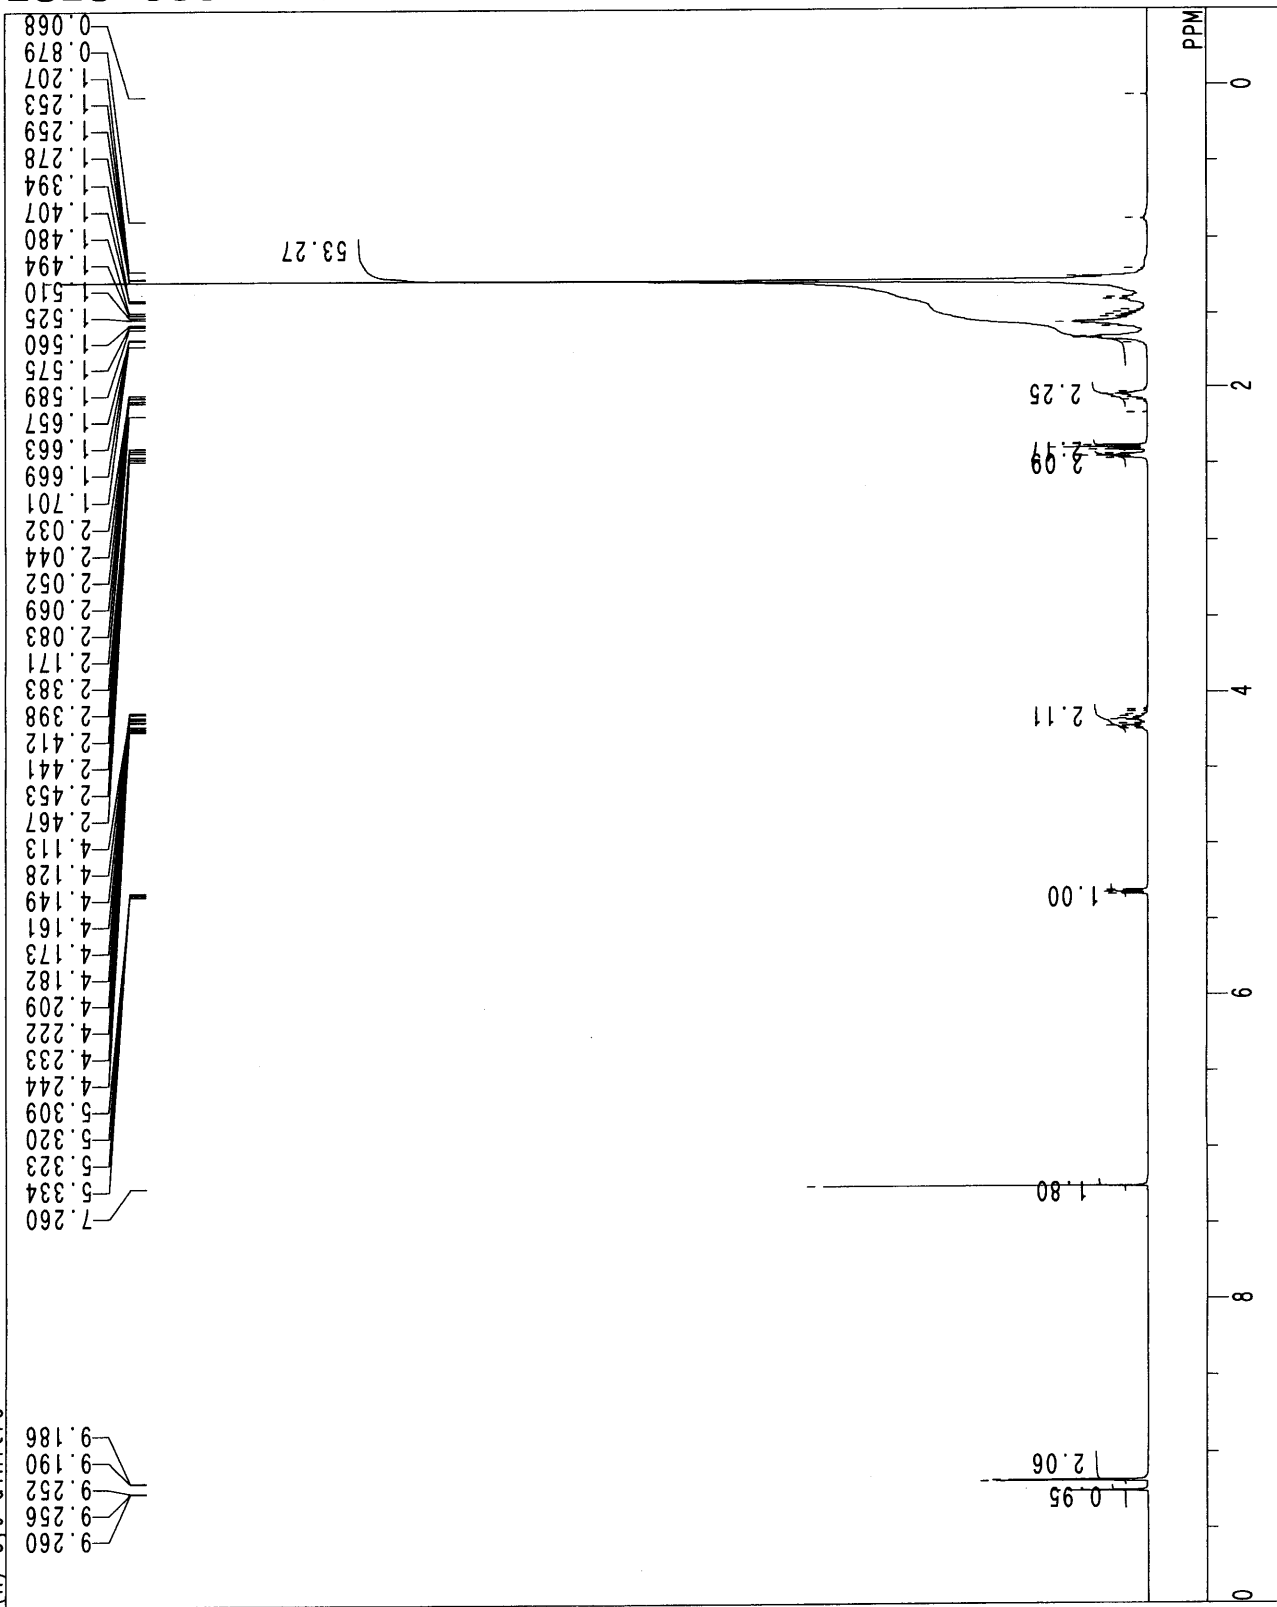

DFILE C:\WinLambda\DATA\shina\akane\akane\ (R)-  
COMNT (R)-3,5-dinitro  
DATIM Tue Sep 05 12:12:57 2006  
OBNUC 1H  
EXMOD non  
OBFREQ 500.00 MHz  
OBSET 0.00 KHz  
OBFIN 162160.00 Hz  
POINT 32768  
FREQU 10000.00 Hz  
SCANS 128  
ACQTM 3.2768 sec  
PD 3.7232 sec  
PW1 6.40 usec  
IRNUC 1H  
CTEMP 25.0 C  
SLVNT CDCL3  
EXREF 7.26 ppm  
BF 0.12 Hz  
RGAIN 18

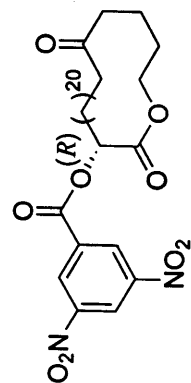

(R)-(1-ent)

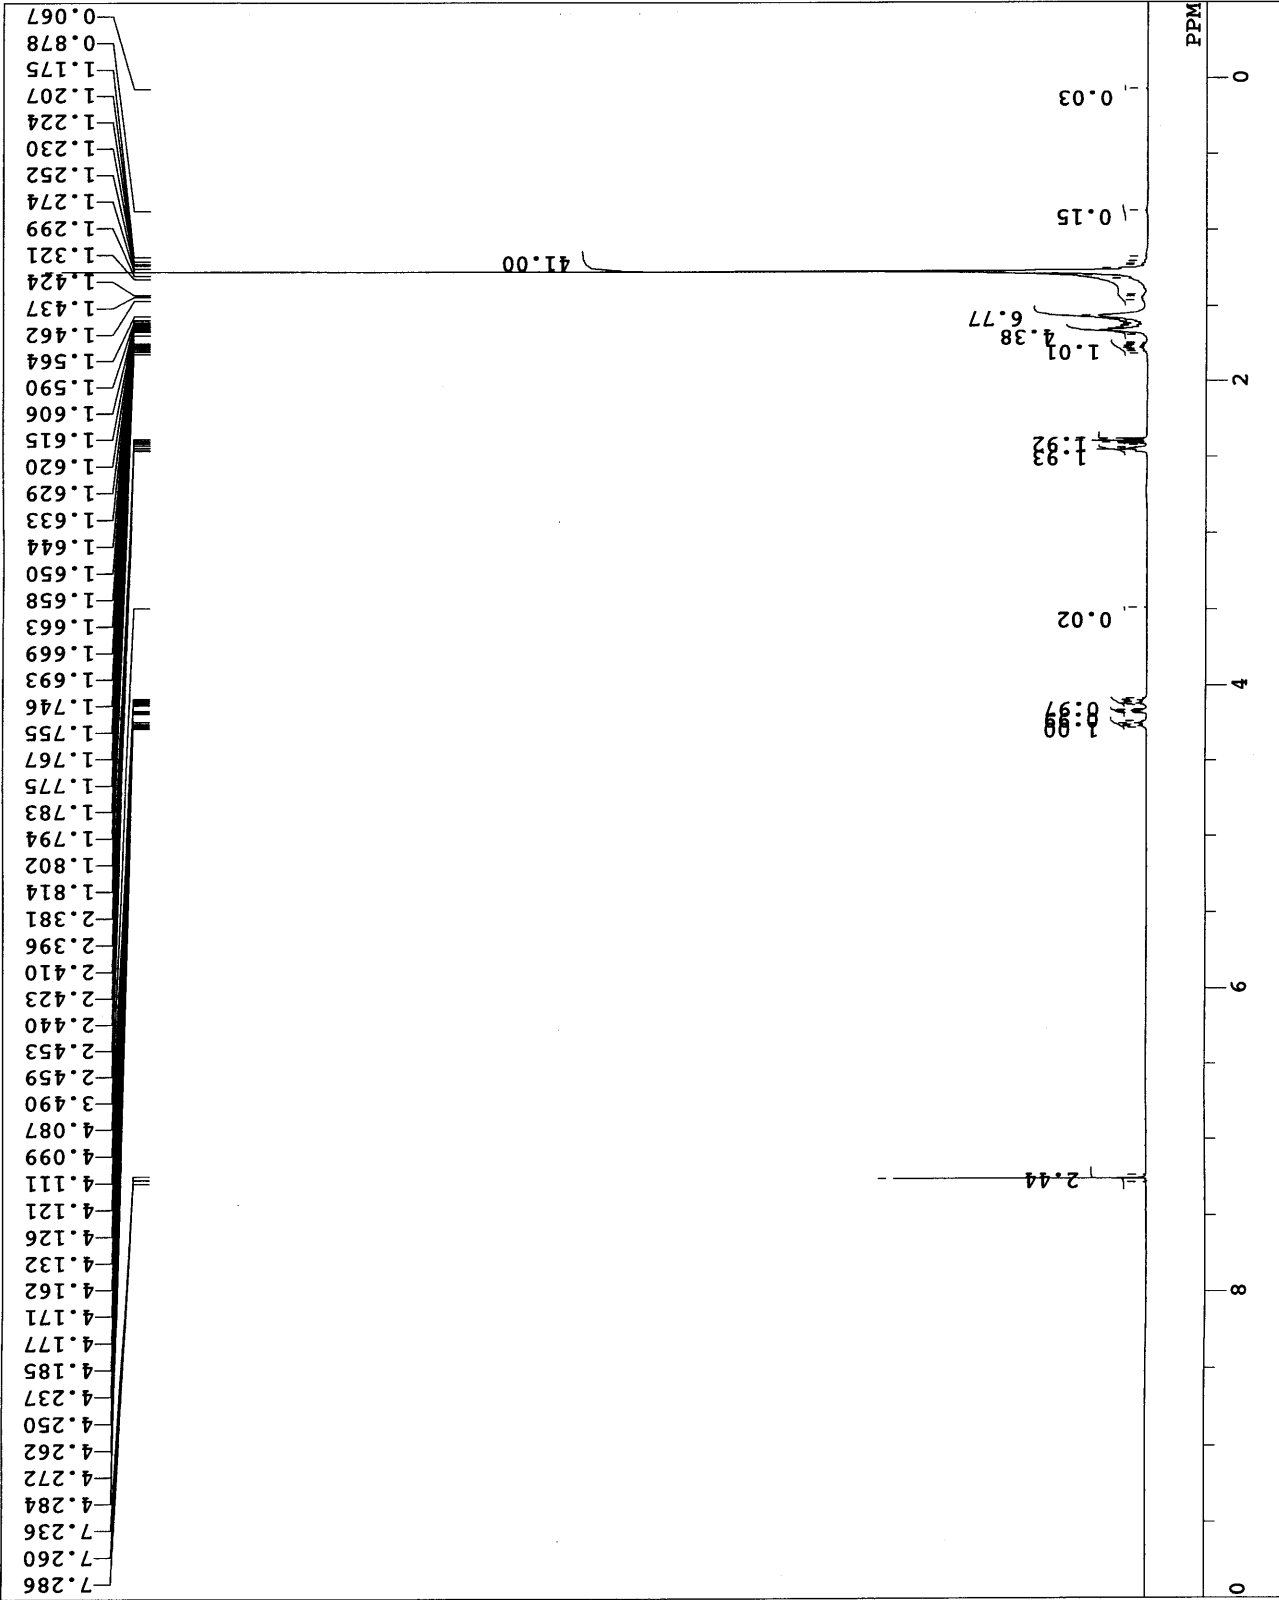

DFILE C:\WinLambda\AutoData\Autolnon\_E1  
OBNUC 1H  
EXMOD non  
OFR 500.00 MHz  
OBSET 0.00 KHz  
OBFIN 162160.00 Hz  
POINT 32768  
FREQU 10000.00 Hz  
SCANS 8  
ACQTM 3.2768 sec  
PD 3.7232 sec  
PW1 6.38 usec  
IRN 23.7 C  
CTEMP CDCL3  
SLVNT 7.26 ppm  
EXREF 0.12 Hz  
BF 18  
RGAIN

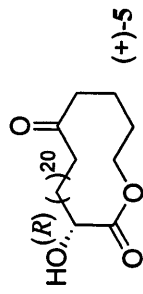

Supplement: Supplementary file 1 [file 4759891]
